# Supplementary material for: Impact of the clinically approved BTK inhibitors on the conformation of full-length BTK and analysis of the development of BTK resistance mutations in chronic lymphocytic leukemia
Source: eLife. 2024 Dec 27;13:RP95488. doi: 10.7554/eLife.95488 (PMC11677227; doi:10.7554/eLife.95488)
Supplement: Supplementary file 1. — In addition to mutations in BTK C481, T474, and L528, other BTK mutations that have been detected include: R28S, E108K, G164D, V416L, A428D, M437R, R490H, Q516K, V537I, and T316A (Maddocks et al., 2015; Ahn et al., 2017; Woyach et al., 2014; Blombery et al., 2022; Wang et al., 2022; Jackson et al., 2023; Handunnetti et al., 2019; Woyach et al., 2019; Woyach et al., 2017; Kanagal-Shamanna et al., 2019; Gángó et al., 2020; Sharma et al., 2016). [file elife-95488-supp1.xlsx]

## Sheet: Sheet1
BTK inhibitor	Total number of patients with BTK mutations.	Patients with BTK C481 mutated.	Patients with BTK T474 mutated.	Patients with BTK L528 mutated.	Patients with other BTK mutations.
Ibrutinib	106	95 (90%)	1 (1%)	1 (1%)	5 (5%)
Acalabrutinib	11	11 (100%)	1 (9%)	0	0
Zanubrutinib	17	15 (88%)	0	11 (65%)	0
Tirabrutinib	6	4 (67%)	3 (50%)	4 (67%)	1 (17%)
Pirtobrutinib	9	0	2 (22%)	4 (44%)	3 (33%)
