# Supplementary material for: Impact of the clinically approved BTK inhibitors on the conformation of full-length BTK and analysis of the development of BTK resistance mutations in chronic lymphocytic leukemia
Source: eLife. 2024 Dec 27;13:RP95488. doi: 10.7554/eLife.95488 (PMC11677227; doi:10.7554/eLife.95488)
Supplement: Supplementary file 2. — The value of each deuterium difference for every colored box in each Figure as well as the complete dataset for each state are also found in this file. [file elife-95488-supp2.xlsx]

## Sheet: Experimental Summary
	HDX Data: Summary and List of Experimental Parameters
		FIGURE 4			FIGURE 6	Figures 6 and 8
	Data Set	WT BTK1, WT BTK1:Zanubrutinib, and WT BTK1:Pirtobrutinib	WT BTK2, WT BTK:Tirabrutinib, and WT BTK:Ibrutinib	WT BTK3 and WT BTK:Acalabrutinib	WT BTK4	T474I BTK, T474I BTK:Pirtobrutinib, T474I BTK:Zanubrutinib, and T474I BTK:Tirabrutinib	L528W BTK, L528W BTK:Pirtobrutinib, L528W BTK:Zanubrutinib, and L528W BTK:Tirabrutinib
	HDX reaction details	Final D2O concentration=94.7%, pHread=7.60, 21 °C. See also footnote a
	HDX time course	10s, 1m, 10m, 1h, 4h
	HDX controls	See replication tab for details
	Back-exchange	30-35%
	Number of peptides	190 followed; 237 identified
	Sequence coverageb	92.5
	Average peptide length; Redundancy	13.7;4.19
	Peptide filtering parameters	0.25 products/amino acid; 2 consecutive products
	Replicates	See replication tab for details
	Repeatability c	+/- 0.25 relative Da
	Significant differences	> 0.5 Da
		a 18-fold dilution with labeling buffer [20 mM Tris pH 8.0, 150mM NaCl, 10% glycerol, 2% DMSO, 99.9% D2O].
		1:1 dilution with quench buffer [150 mM potassium phosphate, pH 2.4, H2O].
		b Maximum possible coverage, actual coverage depends upon construct modification
		c No statistical tests were applied to the HDX MS measurements. Rather, based on measurements of mean methodological error (+/- 0.14 Da; [Houde D, Berkowitz SA, Engen JR. J. Pharm. Sci. 2011;100(6):2071-2086]) we chose a value (+/- 0.25 Da) well above that as the threshold for calling differences in relative deuterium incorporation measurements meaningful. See also explanations of this methodolog…
		The following expanded experimental details were submitted with the PRIDE database deposition

## Sheet: Replication
	DESCRIPTION OF THE NUMBER OF REPLICATES PER EXPERIMENT
	FIGURE 4
	WT BTK1, WT BTK:Zanubrutinib, and WT BTK:Pirtobrutinib						WT BTK2, WT BTK:Tirabrutinib, and WT BTK:Ibrutinib						WT BTK3 and WT BTK:Acalabrutinib
			Number of replicates						Number of replicates						Number of replicates
		Time point	apo	+Zanubrutinib	+Pirtobrutinib			Time point	apo	+Tirabrutinib	+Ibrutinib			Time point	apo	+Acalabrutinib
		undeuterated controls	2	2	2			undeuterated controls	2	3	2			undeuterated controls	2	2
		10 sec	2	3	2			10 sec	2	3	2			10 sec	2	2
		1 min	2	2	2			1 min	2	3	2			1 min	2	2
		10 min	2	3	2			10 min	2	3	2			10 min	2	2
		1 hr	2	2	2			1 hr	2	3	2			1 hr	2	2
		4 hr	2	2	2			4 hr	2	3	2			4 hr	2	2
	FIGURE 6/8
	T474I BTK, T474I BTK:Pirtobrutinib, T474I BTK:Zanubrutinib, and T474I BTK:Tirabrutinib									WT BTK4
			Number of replicates									Number of replicates
		Time point	apo	+Pirtobrutinib	+Zanubrutinib	+Tirabrutinib					Time point	apo
		undeuterated controls	3	2	2	2					undeuterated controls	1
		10 sec	3	2	2	2					10 sec	1
		1 min	3	2	2	2					1 min	1
		10 min	2	2	2	2					10 min	1
		1 hr	3	2	2	2					1 hr	1
		4 hr	3	2	2	2					4 hr	1
	L528W BTK, L528W BTK:Pirtobrutinib, L528W BTK:Zanubrutinib, and L528W BTK:Tirabrutinib
			Number of replicates
		Time point	apo	+Pirtobrutinib	+Zanubrutinib	+Tirabrutinib
		undeuterated controls	2	2	1	2
		10 sec	3	2	2	2
		1 min	2	2	2	2
		10 min	3	2	2	2
		1 hr	2	2	1	2
		4 hr	3	2	2	2

## Sheet: Figure 4
			Relative Deuterium Incorporation: ALL DATA
										WT BTK1						WT BTK1:Zanubrutinib						WT BTK1:Pirtobrutinib							WT BTK2						WT BTK2:Tirabrutinib						WT BTK2:Ibrutinib							WT BTK3
			Sequence	Start	End	MHP	MaxUptake	RT		10 sec	1 min	10 min	1 hour	4 hours		10 sec	1 min	10 min	1 hour	4 hours		10 sec	1 min	10 min	1 hour	4 hours			10 sec	1 min	10 min	1 hour	4 hours		10 sec	1 min	10 min	1 hour	4 hours		10 sec	1 min	10 min	1 hour	4 hours			10 sec	1 min
			AAVILES	2	8	702.403	6	3.50991		1.59186	2.45267	3.38093	3.80617	3.97022		1.52657	2.48914	3.40118	3.76262	3.972		1.58195	2.45815	3.41563	3.81274	4.03972			1.42784	2.31169	3.21841	3.70937	3.91144		1.39943	2.24783	3.17514	3.67993	3.83856		1.42434	2.28496	3.23552	3.69802	3.90466			1.48938	2.30106
			IFLKRSQQKKKTSPLNF	9	25	2063.21	15	3.42301		6.4321	6.5457	6.74239	6.58721	6.73781		6.25718	6.41318	6.48943	6.57122	6.66692		6.15249	6.29001	6.19738	6.34083	6.51462			6.67974	6.90321	6.89336	6.98823	6.95782		6.60557	6.93063	6.89141	7.11381	7.26096		6.64595	6.72946	6.74006	6.91893	7.16126			6.91474	6.93884
			LKRSQQKKKTSPLNF	11	25	1803.06	13	2.8457		6.67688	6.82922	6.78571	6.81757	6.80577		6.47725	6.75232	6.6451	6.72116	6.79363		6.62699	6.90365	6.67298	6.61736	6.70794			6.46473	6.58745	6.57937	6.65815	6.54431		6.41159	6.48758	6.62777	6.65593	6.47875		6.32289	6.49517	6.47811	6.65364	6.57852			6.96419	6.94644
			LTVHKLSY	32	39	960.551	7	3.41268		0.524195	0.969201	1.34274	1.47134	1.47484		0.601086	1.1179	1.54234	1.60526	1.70103		0.566784	1.09816	1.49767	1.47456	1.63113			0.47819	1.06179	1.46879	1.50614	1.63732		0.518632	1.10449	1.52639	1.51529	1.59544		0.486633	1.04833	1.51864	1.54362	1.65338			0.514646	1.01476
			LTVHKLSYYE	32	41	1252.66	9	3.9901		0.54896	1.17221	1.89759	2.45256	2.76332		0.578985	1.31695	2.12405	2.7143	2.66935		0.579797	1.35052	2.17585	2.57809	2.74794			0.691074	1.3647	2.12419	2.77206	2.89719		0.551029	1.24673	2.05225	2.668	2.81116		0.714352	1.35517	2.18916	2.65767	3.00899			0.616672	1.25273
			TVHKLSY	33	39	847.467	6	3.41613		0.504998	0.900851	1.27181	1.32425	1.31487		0.423636	0.908894	1.24435	1.29341	1.36566		0.430442	0.827065	1.19846	1.22259	1.35302			0.474232	0.840727	1.22959	1.26683	1.39273		0.39411	0.766445	1.20098	1.20887	1.31453		0.41283	0.83115	1.20136	1.24011	1.35329			0.427574	0.831133
			YEYDFERGRRGSKKGSIDVE	40	59	2391.17	19	3.42813		5.23177	7.08542	8.26548	8.34972	8.37418		5.04963	7.21933	8.08814	8.43165	8.43193		4.82077	7.15839	7.95476	8.24859	8.47054			4.9873	6.837	8.31055	8.15029	8.25686		4.70822	6.71219	7.96745	8.11604	8.00705		4.77753	6.59312	7.99631	8.19475	8.22537			5.05842	7.18265
			DFERGRRGSKKGSIDVE	43	59	1936	16	2.48354		4.64021	6.60376	7.49626	7.58408			4.44893	6.52388	7.32056	7.43864	7.6615		4.5022	6.44714	7.23995	7.39278	7.71905			4.31859	6.24451	7.23134	7.45421	7.73514		4.07182	6.09047	7.11874	7.31258	7.57054		4.12344	6.06293	6.92532	7.40118	7.46554			4.71754	6.89809
			FERGRRGSKKGSIDVE	44	59	1820.97	15	2.11809		4.14749	6.01265	7.04836	6.9983	7.23614		3.94609	5.80348	6.81136	6.95712	7.14139		3.74389	5.58851	6.6424	6.89031	7.0276			3.5883	5.38713	6.5451	6.73109	6.82304		3.32938	5.3359	6.43665	6.53473	6.73878		3.49232	5.06212	6.30697	6.79362	6.80258			3.69832	5.81941
			VEKITCVE	58	65	920.476	7	3.27178		0.241905	0.524297	0.948201	1.1521	1.51947		0.138917	0.499133	0.920971	1.09858	1.64015		0.145139	0.415488	0.875205	1.0297	1.72786			0.160667	0.386048	0.848105	1.03364	1.44422		0.121783	0.34027	0.849008	0.979344	1.368		0.192128	0.425959	0.879258	1.02723	1.49915			0.222772	0.491653
			VETVIPEKNPPPERQIPRRGEE	64	85	2570.37	16	2.92696		8.02784	9.33759	9.80145	10.2636	10.6849		8.01562	9.3953	9.64759	10.3781	10.7279		8.19312	9.31845	9.55244	9.96648	10.7576			7.62268	8.88709	9.35825	9.68199	10.2107		7.45921	8.60733	9.24583	9.58527	10.2345		7.46804	8.68997	9.30976	9.6388	10.1531			7.75442	9.04886
			VETVIPEKNPPPERQIPRRGEES	64	86	2657.4	17	2.87677		8.96386	10.0706		11.1753	11.2846		9.01888	10.2188	10.3867	11.4482	11.5743		8.9119	10.2463	10.3312	11.1209	11.6056			8.43012	9.68476	10.1345	10.5942	11.144		8.38832	9.34182	10.138	10.4811	11.0361		8.19416	9.86206	10.1617	10.7695	11.0383			8.57356	10.141
			VETVIPEKNPPPERQIPRRGEESSE	64	88	2873.48	19	2.91677		9.69528	10.8181	11.19	11.5982	12.2161		9.44016	10.8786	11.1271	11.7058	12.1347		9.38889	10.7281	10.853	11.4455	12.036			9.04445	10.5194	10.9944	11.3029	11.8427		8.88731	10.4211	10.9987	11.3223	11.9217		9.12301	10.6064	10.8318	11.3461	11.9623			9.35146	10.7185
			VETVIPEKNPPPERQIPRRGEESSEM	64	89	3004.52	20	3.17758		10.1161	11.1819	11.6671	12.0047	12.7397		9.99752	11.4345	11.7651	12.3443	12.6789		9.91078	11.2615	11.4843	11.9617	12.4316			9.59548	10.9214	11.272	11.6938	11.9938		9.64397	10.8401	11.523	11.7174	12.3315		9.47088	10.7087	11.2899	11.5447	12.2225			9.92585	11.1592
			TVIPEKNPPPERQIPRRGEE	66	85	2342.26	14	2.68676		8.05623	8.65112	8.92812	9.2987	9.56872		7.78901	8.66075	8.84211	9.33465	9.49627		7.83789	8.66599	8.75203	9.15971	9.56078			7.46922	8.29012	8.55115	8.78017	9.14648		7.22793	7.9025	8.55121	8.69176	9.03319		7.18246	8.16392	8.45608	8.64831	9.10288			7.45485	8.55956
			TVIPEKNPPPERQIPRRGEES	66	86	2429.29	15	2.64504		9.03522	9.4911	9.99555	10.2264	10.3569		8.83502	9.68173	9.80726	10.302	10.5066		8.61036	9.40636	9.60598	9.98353	10.3975			8.22506	9.15383	9.38617	9.65794	10.0302		8.19324	9.06548	9.30876	9.58342	9.94294		8.05878	9.15603	9.37347	9.67849	10.0926			8.4959	9.50329
			TVIPEKNPPPERQIPRRGEESSE	66	88	2645.36	17	2.68565		9.28196	9.99236	10.2576	10.7313	10.836		9.14157	10.1137	10.2801	10.8723	11.1556		9.03891	10.0165	10.0868	10.5294	11.0048			8.84233	9.74281	9.95539	10.3546	10.7828		8.7095	9.76832	9.9985	10.2804	10.8388		8.82514	9.74243	9.9593	10.43	10.8684			9.06171	10.1046
			TVIPEKNPPPERQIPRRGEESSEM	66	89	2776.4	18	2.97273		9.78821	10.5729	10.8189	11.1065	11.3262		9.59796	10.6004	10.7599	11.2078	11.4179		9.66835	10.5252	10.7137	11.1758	11.536			9.50598	10.3113	10.5444	10.9077	11.2314		9.34796	10.2508	10.4734	10.867	11.2195		9.37282	10.1078	10.4892	10.8512	11.2194			9.41246	10.4713
			ISIIERFPYPFQ	92	103	1509.81	9	5.79837			4.15805	4.3051	4.07103			3.62244	3.89093	3.95846	3.78548	3.93611		3.54729	4.00495	3.99674	4.06157	4.07053			3.44558	3.77518	4.06082	3.90852	3.9768		3.32208	3.78492	3.92769	3.97265	3.82092		3.33793	3.78298	3.84776	3.9027	3.83743
			IIERFPYPFQ	94	103	1309.69	7	5.32547																											1.36898	1.78032	2.06247	2.25239	2.19849		1.34061	1.67067	1.87512	2.14988	2.20063
			IIERFPYPFQVVY	94	106	1670.89	10	6.07834		2.55091	2.64541	3.01018	3.67427	3.14235		2.07117	2.36955	2.85787	3.14283	3.09936		1.86846	2.14778	2.84031	3.08286	3.12039			1.7639	1.99209	2.8238	2.90846	3.06071		1.47004	1.93314	2.41834	2.91649	2.75961		1.38192	1.96195	2.45272	2.77793	2.78768
			IERFPYPFQ	95	103	1196.61	6	5.34136		0.975866	1.18511	1.17154	1.19605	1.2512		0.991149	1.19194	1.21612	1.23268	1.25356		0.851867	1.066	1.13282	1.10731	1.20826			0.918725	1.10839	1.11357	1.1213	1.25248		0.747563	1.00969	1.07894	1.07857	1.11158		0.659804	0.988517	0.981938	1.02356	1.05723			0.796629	1.15382
			VVYDEGPL	104	111	891.446	6	4.38211		1.24399	1.55587	1.98586	2.39432	2.34276		1.18346	1.54868	2.03644	2.4342	2.59993		1.14728	1.64542	1.90847	2.38513	2.6022			0.958224	1.41319	1.82094	2.17222	2.4356		0.886671	1.37589	1.8048	2.20324	2.37875		0.876201	1.36178	1.80156	2.17779	2.37371			0.932836	1.52879
			VVYDEGPLYV	104	113	1153.58	8	5.21777		1.43211	2.12515	3.12356	3.35209	3.45843		1.22076	2.0672	2.8917	3.22785	3.55868		1.33702	2.07502	2.8142	3.34884	3.57904			1.10221	1.76762	2.62745	3.03793	3.35772		1.04557	1.84793	2.65461	3.10604	3.28677		0.986714	1.76218	2.61738	3.10944	3.32759			1.26437	2.14716
			VVYDEGPLYVFSPTEE	104	119	1843.86	13	5.94753		2.33194	3.0979	4.48935	5.12629	5.01936		2.39804	3.34721	4.66902	5.17109	5.4956		2.32516	3.22244	4.51345	4.99771	5.29315			1.9863	2.84362	4.0436	4.66652	4.97012		1.92046	2.76037	3.91676	4.71739	4.76846		1.85757	2.69448	3.85077	4.79141	4.79041			1.86434	2.72274
			YVFSPTEEL	112	120	1084.52	7	5.24298																											1.92308	1.97185	2.296	2.48737	2.58264		1.87394	1.89947	2.29474	2.60315	2.66486
			VIRYNSDL	131	138	979.521	7	3.71419		3.66386	3.85549	4.47767	4.48357	4.54583		3.57765	3.91103	4.35789	4.45105	4.41523		3.52391	4.05427	4.22606	4.52171	4.53121			3.37705	3.57236	4.14557	4.11482	4.11648		3.22234	3.46768	3.99446	4.05919	4.04462		3.31328	3.48462	4.03456	4.09391	4.07573			3.37449	3.81246
			LVQKYHPCF	138	146	1134.58	7	3.90749		0.858512	1.24489	1.33672	1.85014	2.29086		1.00078	1.31264	1.53354	2.02909	2.58975		0.837122	1.30338	1.37107	1.76934	2.54385			0.80506	1.18199	1.32132	1.61928	2.22095		0.809128	1.10797	1.24409	1.62374	2.26224		0.805047	1.18786	1.23605	1.61721	2.05418			0.947654	1.43313
			VQKYHPCF	139	146	1021.49	6	3.69542		0.435864	0.631864	0.762746	1.29356	1.97687		0.275523	0.583559	0.717309	1.34561	1.9604		0.319514	0.535523	0.692197	1.18261	1.95293			0.230038	0.570208	0.752459	1.07831	1.90016		0.302371	0.643017	0.828759	1.16953	1.89061		0.205611	0.548915	0.740306	1.0503	1.83856			-0.103322	0.190003
			QKYHPCF	140	146	922.424	5	3.69834		0.367998	0.617209	0.74399	1.1713	1.72398		0.323175	0.558988	0.681106	1.26184	1.75037		0.265818	0.475446	0.616811	1.0988	1.70449			0.301103	0.502491	0.625826	0.923802	1.59011		0.244062	0.452861	0.613585	0.938589	1.50679		0.265674	0.508537	0.592893	0.94199	1.56221			0.338976	0.548516
			WIDGQYL	147	153	894.436	6	5.41884		0.890305	1.19812	1.50017	2.38782	2.75761		0.854886	1.17945	1.50584	2.39469	2.8178		0.822158	1.15376	1.46351	2.31118	2.72283			0.780127	1.12235	1.39585	2.10776	2.62842		0.707718	1.10029	1.3897	2.10446	2.64685		0.708388	1.08041	1.34747	2.11602	2.61153			0.729865	1.09928
			LCCSQTAKNAMGCQ	153	166	1457.6	13	3.46418		4.92125	6.34031	7.14288	7.45618	7.9406		4.79397	6.09853	6.84428	7.36315	7.64017		4.76143	6.07311	6.77528	7.20904	7.53885			4.54991	5.87806	6.8148	7.1655	7.5321		4.49515	5.78041	6.74499	7.2517	7.4996		4.42159	5.72774	6.71847	7.2517	7.48107			4.57024	6.25047
			CCSQTAKNAMGCQ	154	166	1344.52	12	2.76224		4.80602	5.89909	6.78399	7.12804	7.5166		4.64737	5.90635	6.6577	7.14092	7.49407		4.61869	5.80568	6.64387	7.04825	7.37144			4.6068	5.87753	6.69099	7.15129	7.44399		4.47201	5.73433	6.76212	7.18097	7.41802		4.62163	5.76003	6.78866	7.1243	7.493			4.36185	5.72645
			SQTAKNAMGC	156	165	1010.44	9	2.46118		4.44874	5.37043	5.83663	5.90244	5.89334		4.36738	5.4625	5.76111	5.84147	5.83734		4.27358	5.41845	5.77219	5.7513	5.87189			4.0142	5.2143	5.71076	5.73902	5.77886		4.02274	5.2976	5.75717	5.75409	5.75235		4.10984	5.20472	5.69011	5.7562	5.80539			4.0437	5.28313
			SQTAKNAMGCQ	156	166	1138.5	10	2.29315		3.97479	4.97516	5.33765	5.53481	5.95817		4.30205	5.42395	5.76741	6.04262	6.40687		4.16362	5.20283	5.56102	5.73408	6.27671			3.62534	4.79863	5.3102	5.41308	5.7002		3.57065	4.57829	5.1524	5.22335	5.48336		3.61849	4.64057	5.12285	5.24765	5.56967			3.64375	4.8108
			SQTAKNAMGCQIL	156	168	1364.67	12	4.32192		4.82663	6.09316	6.98944	7.27114	7.55686		4.71556	6.11488	7.05815	7.356	7.65842		4.69076	6.04375	6.97178	7.21176	7.56347			4.45057	5.76598	6.90193	7.06386	7.35627		4.33521	5.71585	6.88974	7.06993	7.31715		4.35543	5.77748	6.856	7.14096	7.41786			4.34634	5.83759
			ILENRNGSLKPGSS	167	180	1471.79	12	2.61107		7.62749	7.67344	7.73487	7.80693	7.70048		7.57354	7.66521	7.67101	7.7799	7.79046		7.54913	7.81481	7.47844	7.6551	7.63841			7.4269	7.42336	7.38848	7.45556	7.46322		7.29938	7.44617	7.50108	7.41693	7.42302		7.31719	7.39681	7.39629	7.42263	7.36659			7.62946	7.64123
			ILENRNGSLKPGSSHRKTKKPLPPTPEE	167	194	3110.71	22	2.52536																											10.6395	10.8215	10.8298	10.9797	10.9605		10.5964	10.6353	10.661	10.9104	10.9938
			DQILKKPLPPEPTAAPIST	195	213	2016.14	13	3.62894		9.73145	9.69278	9.7909	9.73024	9.83784		9.62587	9.73037	9.77777	9.7369	9.74334		9.49574	9.64248	9.58705	9.59939	9.67618			9.52604	9.49401	9.52685	9.5567	9.55247		9.33403	9.24559	9.37216	9.32409	9.30233		9.29923	9.32012	9.31229	9.34711	9.36573			9.79429	9.79973
			DQILKKPLPPEPTAAPISTTE	195	215	2246.23	15	3.65997		11.2003	11.1537	11.077	11.3076	11.1918		10.969	11.1399	11.1206	11.218	11.2398		10.9967	11.0912	10.9724	11.023	11.1443			10.8677	10.8692	10.9177	10.8645	10.8738		10.6967	10.7336	10.7825	10.834	10.7926		10.5828	10.8112	10.7976	10.815	10.8425			11.1746	11.2179
			DQILKKPLPPEPTAAPISTTEL	195	216	2359.31	16	4.28228		11.7889	11.7687	11.924	11.8756	11.9086		11.7622	11.8765	11.9038	11.9118	11.9732		11.7257	11.8117	11.7537	11.8872	11.8775			11.7365	11.7215	11.7684	11.7427	11.7084		11.71	11.8462	11.9049	11.8134	11.8158		11.7087	11.6641	11.8635	11.88	11.7677			11.8235	11.8935
			QILKKPLPPEPTAAPIST	196	213	1901.11	12	3.45709		8.99219	8.899	9.01279	9.05982	9.08002		8.87777	9.01045	9.03672	8.99888	9.0432		8.91071	8.99555	8.96728	9.07337	8.98327			8.93221	8.90029	8.96491	8.89515	8.92327		8.75676	8.70464	8.87822	8.83346	8.79721		8.85101	8.85958	8.90656	8.93937	8.91168			8.97544	9.0771
			QILKKPLPPEPTAAPISTTE	196	215	2131.2	14	3.48449		10.3009	10.2017	10.3024	10.3949	10.4715		10.1675	10.3087	10.3622	10.3711	10.365		10.0679	10.2656	10.1533	10.2831	10.2711			10.3071	10.1282	10.1766	10.1134	10.1649		10.1221	10.0196	10.1455	10.121	10.2126		10.1216	10.1066	10.2079	10.254	10.2225			10.2349	10.3808
			ILKKPLPPEPTAAPIST	197	213	1773.05	11	3.32091		8.00171	8.0893	8.05585	8.12623	8.10333		8.06571	8.03092	8.15063	8.22959	8.09826		7.93653	8.08287	8.05387	8.04794	8.19749			8.00118	7.93284	8.00403	7.988	7.99228		7.88838	7.85276	7.93503	7.94918	7.9334		7.79333	7.9929	7.98133	8.04187	8.02705			8.01406	8.05131
			ILKKPLPPEPTAAPISTTE	197	215	2003.14	13	3.35442		9.39844	9.19774		9.459	9.5093		9.40725	9.52512	9.62185	9.57618	9.63577		9.40256	9.58033	9.53647	9.57518	9.66402			9.42066	9.35327	9.3241	9.42069	9.37922		9.42385	9.46458	9.45685	9.50112	9.4744		9.41245	9.45843	9.5545	9.42559	9.54432			9.56743	9.58823
			LKKPLPPEPTAAPIST	198	213	1659.97	10	3.17883		7.32618	7.22105	7.23253	7.23305	7.14306		7.39724	7.31176	7.4317	7.51732	7.58287		7.23541	7.31584	7.25303	7.35724	7.30202			7.13099	7.14631	7.32669	7.20253	7.2178		7.29671	7.03035	7.25681	7.25427	7.1151		7.12055	7.23755	7.24176	7.12566	7.36685			7.32376	7.3239
			TELKKVVAL	214	222	1000.64	8	3.47449		1.29027	2.08321	2.69816	3.85405	5.24687		1.20974	2.08481	2.94588	4.27466	5.37357		1.17215	1.95678	2.27839	2.5836	3.64142			1.0542	1.84285	2.35804	3.26039	4.5349		1.02693	1.82241	2.52037	3.71805	4.97105		1.05441	1.84307	2.69069	3.93008	5.0032			1.07186	1.85427
			LKKVVAL	216	222	770.55	6	2.99		0.224749	0.513035	0.973745	1.89724	3.2104		0.234307	0.533677	1.20693	2.33778	3.42537		0.159614	0.392808	0.576472	0.850339	1.77986			0.111984	0.357108	0.708168	1.45154	2.66294		0.080869	0.350093	0.841404	1.89263	2.97932		0.165854	0.444074	0.982818	2.10237	3.05358			0.217498	0.459815
			YDYMPMNA	223	230	1004.39	6	4.64606		2.41594	3.01918	3.15375	3.36959	3.64232		2.5966	3.06616	3.15874	3.44111	3.77024		1.83426	2.72321	3.08113	3.11297	3.26656			2.18469	2.91503	3.04868	3.16984	3.45644		2.41612	2.99892	3.09062	3.27801	3.59605		2.58056	3.03617	3.10771	3.36273	3.65284			2.21541	3.00005
			YDYMPMNAND	223	232	1233.46	8	4.3896		3.06265	3.68391	4.04973	4.49805	4.82232		3.28176	3.78672	4.24659	4.66199	5.02613		2.56892	3.50069	3.86087	4.20185	4.44687			2.86946	3.61145	3.84514	4.29886	4.58234		3.1208	3.67329	4.03088	4.47042	4.81356		3.21809	3.67428	4.09185	4.5136	4.88634			2.84169	3.62816
			LQLRKGEE	233	240	972.547	7	2.3394		0.299224	0.411109	1.3875	3.05104	4.2377		0.371698	0.563288	1.90201	3.51656	4.51338		0.261002	0.304901	1.06533	1.9259	2.92888			0.315597	0.437021	1.07462	2.43865	3.80787		0.35875	0.437241	1.32312	2.98076	4.04867		0.382298	0.489317	1.60166	3.20597	4.14799			0.332387	0.394513
			LQLRKGEEY	233	241	1135.61	8	2.65854		0.254108	0.351002	1.25407	2.74478	4.14186		0.370352	0.468604	1.61504	3.26659	4.52783		0.20293	0.24801	0.838524	1.4934	2.54763																						0.271512	0.34954
			LQLRKGEEYF	233	242	1282.68	9	4.16021		0.196035	0.303868	1.35521	2.96823	4.82816		0.234291	0.383502	1.72517	3.67279	5.30898		0.148759	0.209271	0.812174	1.58306	2.87429			0.180737	0.253142	0.932557	2.47894	4.27946		0.203519	0.27648	1.18617	3.11858	4.88894		0.217406	0.296294	1.457	3.54181	5.05096			0.191203	0.256684
			QLRKGEE	234	240	859.463	6	2.33848		0.471726	0.577082	1.5903		4.22342		0.458183	0.597168	1.82986	3.42774	4.22449		0.304616	0.445688	1.08721	1.72396	3.02022			0.259614	0.400221	1.01294	2.27704	3.5895		0.343926	0.44786	1.29576	2.82782	3.95408		0.317863	0.431935	1.33987	3.10663	3.92256			0.555288	0.589898
			QLRKGEEY	234	241	1022.53	7	3.10063		0.290064	0.361617	1.22364	2.77926	4.21379		0.210133	0.405703	1.60538	3.24114	4.44285		0.197148	0.20394	0.825629	1.54045	2.59643			0.261273	0.337327	0.966194	2.28426	3.79007		0.253075	0.355791	1.154	2.88489	4.14835		0.275271	0.365295	1.33787	3.15	4.24112			0.232014	0.325273
			RKGEEYF	236	242	928.452	6	3.49294		0.205815	0.273253	0.839709	1.82534	2.76229		0.201318	0.271174	1.07692	2.06498	2.95632		0.100679	0.164131	0.625205	1.07281	1.69757			0.187414	0.134284	0.574038	1.23474	2.22071		0.067365	0.170576	0.71232	1.52206	2.49878		0.092231	0.1763	0.836306	2.02096	2.67471			0.39724	0.420096
			ILEESNLPWWRARDKNGQEGYIPSN	243	267	2972.46	22	4.81069		4.06927	5.28657	7.94674	10.9846	12.7084		4.19417	5.50824	8.66326	11.5827	13.1747		3.86958	5.13946	7.15417	8.73743	10.5212			3.8423	5.06386	7.16371	10.0647	12.0368		3.91226	5.13754	7.67341	10.8815	12.6644		4.02309	5.31757	8.20502	11.4214	12.8325			3.78593	5.21203
			ILEESNLPWWRARDKNGQEGYIPSNY	243	268	3135.53	23	5.04349		3.86849	5.03275	8.03911	11.42	13.1362		3.88409	5.29955	8.56979	11.707	13.4183		3.61482	4.83883	6.90173	8.41837	10.6919			3.72776	4.97878	7.19574	10.3972	12.5943		3.7039	5.06487	7.67209	11.3805	13.0291		3.88378	5.07578	8.22141	11.8328	13.3388			3.51873	4.89133
			EESNLPWWRARDKNGQEGYIPSN	245	267	2746.3	20	4.51001		3.15506	4.26009	6.74981	9.67298	11.3268		3.17673	4.47065	7.35148	10.0149	11.7144		2.89909	4.11797	5.72516	7.27499	9.11182			2.85276	4.08674	6.01367	8.62981	10.5638		2.92446	4.18453	6.4942	9.61655	11.2166		2.98452	4.26897	6.89996	9.81606	11.3399			2.79437	4.1785
			EESNLPWWRARDKNGQEGYIPSNY	245	268	2909.36	21	4.80071		2.86403	4.1933	6.75529	10.2582	11.994		3.08483	4.41603	7.57812	10.6597	12.4474		2.85623	3.99228	5.75358	7.34211	9.59026			2.75999	4.01871	5.9407	9.00123	11.2832		2.88389	4.10841	6.50157	9.9732	11.8082		2.94881	4.21611	7.02616	10.3866	11.9698			2.78549	4.39736
			ESNLPWWRARDKNGQEGYIPSN	246	267	2617.25	19	4.48502		2.73202	3.28728	6.46627	9.21018	10.673		2.67556	3.89471	6.87971	9.34191	11.1218		2.41673	3.49357	5.27895	6.51124	8.52239			2.24629	3.39222	5.20636	7.84873	9.79796		2.30449	3.46384	5.6865	8.81149	10.3779		2.35394	3.60542	6.10813	9.05762	10.5439			2.32827	3.47278
			ESNLPWWRARDKNGQEGYIPSNY	246	268	2780.32	20	4.77829		2.53908	3.67213	6.3	9.62323	11.4455		2.63069	3.83299	6.98868	10.0775	11.7975		2.25481	3.51513	5.17745	6.72879	8.88223			2.36751	3.46249	5.41074	8.49875	10.7832		2.40835	3.55216	5.99022	9.49365	11.3995		2.46043	3.66285	6.43147	9.78922	11.4885			2.19598	3.48226
			AEDSIEM	272	278	794.324	6	3.87612		2.45076	2.93596	3.269	3.30886	3.2838		2.45897	2.98432	3.24003	3.2861	3.28321		2.17964	2.74138	3.13146	3.20313	3.19152			2.28325	2.7781	3.16	3.2033	3.21059		2.36239	2.84864	3.20966	3.23132	3.23102		2.39611	2.85405	3.18151	3.21422	3.2235			2.31509	2.83888
			YEWYSKHMTRSQAEQL	279	294	2056.95	15	4.04424		2.7689	3.56114	5.37957	7.03359	8.19427		2.79529	3.74418	5.56742	7.35703	8.23849		2.37557	3.23873	4.50393	5.61179	7.05278			2.71858	3.53565	4.82491	6.24788	7.59637		2.81877	3.56923	5.17246	6.64608	8.08024		2.87301	3.62712	5.32788	6.8247	8.16428			2.71953	3.60061
			WYSKHMTRSQAEQL	281	294	1764.85	13	3.39046		2.95726	3.55303	4.21546	5.89275	6.97625		3.04212	3.67186	4.59187	6.25576	7.20825		2.67744	3.50529	3.7448	4.4641	5.89108			3.02248	3.80128	4.16697	5.20474	6.50503		3.16203	3.97073	4.49939	5.71515	7.08064		3.2558	3.95479	4.56216	5.90281	7.08138			2.93128	3.71858
			YSKHMTRSQA	282	291	1208.58	9	1.64076																											3.36542	4.06212	4.15041	4.45462	4.77016		3.4135	4.04505	4.07307	4.5056	4.70649
			YSKHMTRSQAEQ	282	293	1465.69	11	1.75482																											3.17989	3.91637	4.04542	5.0651	5.99793		3.40468	3.91141	4.16212	5.27892	6.0424
			YSKHMTRSQAEQL	282	294	1578.77	12	2.6798		2.96909	3.46776	3.93673	5.46909	6.65318		2.98268	3.5684	4.24934	5.79319	6.79162		2.66399	3.34647	3.44757	3.98655	5.51082			2.74144	3.37396	3.57235	4.38163	5.75838		2.87748	3.46846	3.80956	4.90192	6.27626		2.93965	3.47297	3.85864	5.17034	6.351			2.81035	3.5178
			YSKHMTRSQAEQLL	282	295	1691.85	13	3.49996																											3.13223	3.89941	4.14441	5.47571	7.19899		3.20741	3.8667	4.15894	5.80586	7.43394
			LLKQEGKEGGF	294	304	1205.65	10	2.67796		1.4566	2.22043	3.60693	5.11333	5.73876		1.66158	2.34484	4.00126	5.54217	5.79964		1.65884	2.29146	3.28456	4.07138	4.99966																						1.42203	2.06979
			LKQEGKEGGF	295	304	1092.57	9	2.63692		1.54115	2.14432	3.55829	4.55541	4.83258		1.53994	2.29911	3.78784	4.70569	4.90004		1.37412	1.95318	3.09043	3.83241	4.51688			1.34524	1.92561	3.09382	3.96687	4.52621		1.63216	2.20719	3.67546	4.94049	5.25716		1.57322	2.25154	3.82269	4.96018	5.21846			1.42649	1.99616
			IVRDSSKAGKYTVSV	305	319	1609.89	14	3.10193		4.00217	4.5385	5.36154	7.35303	8.45113		3.96201	4.67603	5.82318	7.77005	8.59369		3.79689	4.42221	4.65838	5.25234	7.042			3.86757	4.45033	4.92535	6.32848	8.00903		3.91047	4.46711	5.27822	7.10707	8.36747		3.88679	4.54138	5.42896	7.27412	8.33552			4.0849	4.64481
			IVRDSSKAGKYTVSVF	305	320	1756.96	15	3.94278		3.81374	4.42462	5.3446	7.82836	8.92095		3.6409	4.39584	5.59578	7.99461	9.00067		3.55819	4.10602	4.29845	4.7617	7.64793			3.6744	4.29623	4.73538	6.27887	8.28611		3.50729	4.02697	4.94778	6.89458	8.56823		3.51594	4.18259	5.11355	7.22606	8.39142			3.99078	4.57312
			FAKSTGEPQGVIRH	320	333	1526.81	12	2.52985		5.6824	6.3032	7.01788	7.39098	7.70187		5.55895	6.64331	7.10602	7.66043	7.73518		5.45648	6.50983	6.90006	6.97534	7.34347			5.55953	6.48886	6.9579	7.22358	7.61491		5.52147	6.55386	7.09735	7.48315	7.78989		5.54455	6.41676	7.09741	7.52453	7.65079			5.4977	6.41579
			FAKSTGEPQGVIRHYVV	320	336	1888.01	15	3.83109		5.43235	6.37714	7.27437	8.19911	8.97887		5.33765	6.46891	7.31703	8.38599	8.99589		5.29505	6.3109	6.74462	7.11101	8.09028			5.43791	6.49622	7.18269	7.74883	8.53284		5.35922	6.37885	7.25348	8.03254	8.91912		5.33372	6.35779	7.18312	8.22971	8.94611			5.38813	6.4046
			FAKSTGEPQGVIRHYVVC	320	337	1991.02	16	4.00974		5.62375	6.64461	7.5255	9.02434	9.84489		5.48698	6.62403	7.62925	9.16262	10.0223		5.4133	6.4046	7.05721	7.58061	8.90876			5.66627	6.74488	7.40463	8.32737	9.44017		5.63537	6.64736	7.56891	8.85643	9.87102		5.58723	6.61873	7.70072	9.08558	9.962			5.48972	6.56882
			FAKSTGEPQGVIRHYVVCSTPQSQ	320	343	2619.3	21	3.93879		7.64	9.0716	11.2516	12.8489	13.4531		7.51742	9.34412	11.5052	13.0405	13.7194		7.2453	8.99533	10.4474	11.2152	12.7746			7.19306	9.13052	10.7148	12.009	13.1164		7.21909	9.10166	10.9408	12.4944	13.4942		7.31244	9.03577	11.1583	12.7933	13.5707			7.3245	9.2927
			FAKSTGEPQGVIRHYVVCSTPQSQY	320	344	2782.36	22	4.17855		7.08973	8.85783	11.0227	12.9905	14.0461		7.13687	9.05229	11.4651	13.448	14.2704		6.96208	8.77535	10.3492	11.4522	12.917			7.00278	8.76788	10.5751	12.1824	13.4177		6.70941	8.54194	10.6353	12.5348	13.6137		6.73827	8.77787	10.8624	12.7333	13.6914			6.90072	8.83717
			AKSTGEPQGVIRHYVVC	321	337	1843.95	15	3.82945		5.39919	6.37088	7.32107	9.07646	9.8311		5.19014	6.27209	7.5556	9.02133	9.81155		5.1317	6.21293	6.8224	7.29152	8.99592			5.00942	6.16385	6.8735	7.76048	8.83119		5.07975	6.21394	7.07423	8.17016	9.32066		4.94545	6.12255	7.08177	8.4338	9.32061			5.0822	6.30682
			AKSTGEPQGVIRHYVVCSTPQSQ	321	343	2472.23	20	3.76763		6.57991	8.18601	10.0085	11.5976	12.562		6.53875	8.38327	10.3263	11.9545	12.7584		6.3445	8.03469	9.3256	10.3617	11.5324			6.38913	8.14812	9.67909	10.9127	11.9686		6.40755	8.08462	9.96663	11.3601	12.439		6.38377	8.08327	10.0154	11.5934	12.4185			6.30716	8.11822
			AKSTGEPQGVIRHYVVCSTPQSQY	321	344	2635.29	21	4.4385		6.6379	8.30523	10.3525	12.3046	13.349		6.57304	8.52085	10.9396	12.7983	13.4554		6.52509	8.13518	9.76765	10.7773	12.3435			6.45965	8.29911	9.99943	11.4611	12.8149		6.2176	8.13065	10.2439	11.9629	13.2581		6.35288	8.06268	10.3606	12.1616	13.2539			6.27263	8.18375
			PQGVIRHYVV	327	336	1167.66	8	3.82976		3.35257	4.10315	4.74067	5.61585	6.15614		3.33249	4.30499	5.01839	6.05683	6.4575		3.14165	3.9032	4.37255	4.63606	5.75337			2.9957	3.82959	4.44897	4.78349	5.69395		3.02876	3.90774	4.52695	5.23878	5.9135		2.88614	3.94981	4.54709	5.37324	5.96483			2.96161	3.71016
			YVVCSTPQSQ	334	343	1111.51	8	3.18205		1.8863	2.298	3.36506	4.15029	4.66886		1.75007	2.41556	3.60927	4.26559	4.83689		1.78145	2.33225	3.1109	3.61614	4.29991			1.49067	1.99409	3.07692	3.71144	4.06395		1.51268	2.08457	3.06013	3.73372	4.21729		1.51927	2.16092	3.20455	3.76372	4.26612			1.95096	2.58119
			YVVCSTPQSQY	334	344	1274.57	9	3.8944		1.81321	2.51092	3.83015	5.14044	5.68617		1.83287	2.5942	4.06686	5.23607	5.76671		1.75353	2.36436	3.4042	4.16632	5.12634			1.64308	2.26108	3.30227	4.36017	5.01019		1.61357	2.2515	3.46726	4.64675	5.09687		1.63637	2.24489	3.67187	4.67237	5.16807			1.74143	2.4299
			YYLAEKHLFSTIPEL	344	358	1823.96	13	5.50982		2.34678	3.62222	5.20543	6.4872	6.9089		2.37806	3.78465	5.50855	6.70705	7.06726		2.29249	3.50655	4.87463	5.86593	6.52836			2.37725	3.59684	4.97337	6.06019	6.79596		2.30731	3.51383	5.02655	6.30564	6.81664		2.32795	3.55793	5.20553	6.39235	6.87875			2.37878	3.59
			YLAEKHL	345	351	873.483	6	2.81011		2.16312	3.05822	3.20232	3.1019	3.15152		2.17041	3.03031	3.12695	3.1263	3.12894		2.16529	3.02384	3.14582	3.08984	3.12829			2.09461	2.82099	3.01963	2.95832	3.01502		2.02074	2.80691	2.9241	2.93	2.91805		2.12466	2.83302	2.94926	2.96384	3.06145			2.13876	2.96958
			YLAEKHLFSTIPEL	345	358	1660.89	12	5.27226		2.19149	3.28999	4.64785	5.5566	5.89939		2.18137	3.42152	4.79863	5.67652	6.04113		2.0535	3.15256	4.31112	4.88733	5.57818			2.19215	3.19708	4.4209	5.17739	5.80182		2.18833	3.29561	4.58133	5.3937	5.87397		2.1961	3.35855	4.63912	5.48165	5.91086			2.19762	3.22725
			LAEKHLFSTIPEL	346	358	1497.83	11	5.05768		1.96128	2.76907	4.0747	4.94965	5.31149		1.88945	2.89585	4.18784	5.10037	5.39324		1.91859	2.69148	3.7446	4.23494	4.96179			2.02416	2.76016	3.89391	4.66253	5.16412		1.99049	2.8132	4.06593	4.93238	5.46255		2.02632	2.90723	4.16661	5.14259	5.57072			1.93434	2.7042
			LAEKHLFSTIPELINYHQHNSAG	346	368	2619.33	21	3.62632		6.90832	8.9919	10.6301	12.4982	13.3906		6.95768	9.03318	11.025	12.9765	13.7751		6.85456	8.95476	10.0739	11.3411	12.2093																						6.65673	8.61437
			FSTIPEL	352	358	806.429	5	5.15681		0.461419	1.25967	2.29128	2.78087	3.00182		0.395559	1.32294	2.35529	2.87739	3.05064		0.35432	1.12814	2.049	2.34136	2.75124			0.256426	0.884873	1.91861	2.36735	2.68453		0.239717	0.903169	1.97355	2.49228	2.84537		0.244162	0.883778	1.99496	2.54493	2.8555			0.284549	0.984302
			TIPELINYHQHNSAGLISRLKY	354	375	2567.37	20	4.28369		3.17571	4.17179	6.01842	8.54041	9.58549		3.30579	4.08853	6.18093	8.26343	9.47837		3.22908	4.17751	5.97815	8.34869	9.51339																						3.13187	3.96517
			INYHQHNSAGL	359	369	1253.6	10	2.91496		2.64426	2.70143	3.03371	3.7247	3.81797		2.52132	2.71936	3.19109	3.78385	3.84895		2.48819	2.5096	2.63137	3.04464	3.62866			2.55061	2.58529	2.79906	3.37064	3.69781		2.58637	2.59342	2.96767	3.62457	3.7507		2.5601	2.61841	3.02665	3.60244	3.77738			2.67313	2.69537
			NYHQHNSAGL	360	369	1140.52	9	2.91681		2.62332	2.62332	2.97003	3.64869	3.81228		2.54694	2.68954	3.12986	3.78243	3.8363		2.50797	2.57615	2.61898	3.06198	3.59476			2.51465	2.56291	2.73791	3.31944	3.63886		2.53824	2.59928	2.93659	3.55419	3.72579		2.56486	2.6231	3.02994	3.55708	3.71309			2.63478	2.68461
			HQHNSAGL	362	369	863.412	7	1.79185		2.75765	2.73862	2.78667	2.85109	2.82914		2.73516	2.8189	2.84813	2.86866	2.81774		2.69506	2.83768	2.81405	2.78842	2.83409			2.65682	2.67891	2.73589	2.76965	2.75804		2.69058	2.60283	2.79838	2.80333	2.69728		2.68916	2.67025	2.75003	2.77882	2.75272			2.81111	2.85686
			ISRLKYPVSKQNKNAPSTAGL	370	390	2272.28	18	3.1634		7.99032	8.53413	10.5058	11.6907	11.5122		8.36693	9.02628	11.0718	12.0402	11.9807		7.62522	8.55693	9.73227	11.4534	11.659			8.45658	8.89698	10.0785	11.8929	11.928		8.61489	9.11635	10.578	12.0171	12.1372		8.64053	9.0871	10.6715	12.1743	12.1238			8.5138	8.92436
			ISRLKYPVSKQNKNAPSTAGLG	370	391	2329.3	19	3.02846		9.43747	9.93509	12.2591	13.1093	12.953		9.38062	10.17	12.3405	13.0489	13.0718		8.46631	9.52257	10.8398	12.2594	12.6987			9.14613	9.66237	10.9431	12.5649	12.6951		9.21543	9.80192	11.2643	12.6692	12.7399		9.21374	9.73179	11.3992	12.6495	12.7346			9.55001	10.0783
			ISRLKYPVSKQNKNAPSTAGLGYGSW	370	395	2822.49	23	4.16418		11.3255	11.8743	13.6317	14.7852	14.8574		11.2365	12.1074	14.0389	14.8532	14.9013		10.2038	11.7204	12.7704	14.4751	14.7173			11.595	12.0379	13.3286	14.9603	14.9962		11.6608	12.0787	13.698	15.0221	15.0316		11.5568	12.0857	13.8114	15.0278	15.0033			11.6428	12.0896
			EIDPKDLTF	396	404	1077.55	7	4.87757		2.04743	2.33353	3.3368	3.87395	4.32465		2.0581	2.31058	3.07893	3.74939	4.15648		2.03893	2.16046	2.56162	3.34067	3.73178			1.92503	2.16749	2.94931	3.52547	3.98097		1.87301	2.08285	2.62642	3.43069	3.7854		1.85183	2.12936	2.77078	3.47977	3.89784			1.91536	2.25476
			EIDPKDLTFL	396	405	1190.63	8	5.53737		1.85362	2.46682	3.47786	4.00337	4.32109		1.78666	2.32484	3.2622	3.88664	4.18411		1.63774	1.97262	2.71445	3.3877	3.79738			1.66628	2.15458	3.11703	3.70259	4.10499		1.54932	1.98771	2.84888	3.53738	3.87699		1.58454	2.23497	3.03414	3.62735	4.03712			1.68035	2.268
			FLKELGTGQF	404	413	1139.61	9	4.69247		4.77308	5.45946	5.63497	5.78701	5.72104		4.05583	4.87749	5.70865	5.74415	5.80084		3.5945	4.26979	4.91666	5.3748	5.75953			4.78961	5.51901	5.80732	5.79556	5.78386		4.03411	4.58628	5.47167	5.69444	5.66672		4.05395	4.88818	5.46682	5.66812	5.66044			4.7648	5.5649
			LKELGTGQF	405	413	992.541	8	4.02973		4.6155	5.10074	5.26761	5.27349	5.30439		4.16115	4.65894	5.18766	5.26666	5.23209		3.59403	4.09244	4.39684	4.86127	5.19081			4.55966	4.98372	5.23546	5.19896	5.17691		3.97741	4.46429	4.97121	5.1393	5.13166		4.06766	4.60007	4.90657	5.11073	5.1053			4.62019	5.10724
			LKELGTGQFGVVKYGKWRGQY	405	425	2414.3	20	4.35956		5.79702	7.55356	10.173	11.8299	12.2164		4.87877	6.3453	8.26689	9.32797	10.2832		3.88753	5.23967	6.93212	8.00299	8.82332			5.32509	7.07503	9.67849	11.2825	11.9434		4.52719	6.05661	7.76414	9.01788	9.54739		4.57325	6.28076	8.10312	9.63147	10.0416			5.54656	7.15592
			KELGTGQF	406	413	879.457	7	3.53052		3.84508	4.25867	4.29793	4.40897	4.41748		3.31514	3.796	4.33223	4.3624	4.41086		2.87497	3.25234	3.58877	3.95726	4.25535			3.89256	4.3124	4.49193	4.50091	4.5487		3.34903	3.72095	4.26867	4.40985	4.44939		3.4637	3.87291	4.25895	4.4609	4.41134			3.69562	4.15101
			GVVKYGKWRGQY	414	425	1440.77	11	3.6154		1.60126	2.58639	5.19862	7.06701	7.55533		1.44559	2.2069	3.4462	4.53783	5.34689		1.15876	1.76633	2.73548	3.34836	3.9692			1.18842	2.07012	4.33995	6.41003	7.20088		1.16442	1.77262	2.92597	3.98637	4.65402		1.18109	1.89686	3.46931	4.75163	5.44334			1.40572	2.33158
			GVVKYGKWRGQYD	414	426	1555.8	12	3.46166																											2.13313	2.74031	4.00189	4.61003	5.46885		2.15322	2.87018	4.19679	5.42217	6.40905
			GVVKYGKWRGQYDVA	414	428	1725.91	14	3.71803		1.81577	2.79082	5.41497	7.10329	7.6512		1.68947	2.36135	3.59839	4.56766	5.31852		1.44824	2.04242	3.00588	3.50939	4.11266			1.72974	2.48086	4.80228	6.69491	7.55005		1.74426	2.25768	3.3975	4.43445	5.0453		1.75936	2.51801	3.97808	5.16998	5.95884			1.65516	2.53661
			VKYGKWRGQY	416	425	1284.68	9	3.61974		1.39551	2.22892	4.33694	5.83319	6.29497		1.36218	1.9076	3.00814	3.82579	4.6041		1.15965	1.64831	2.52008	3.00843	3.51314			1.386	2.1492	4.09774	5.96087	6.6648		1.34947	1.8131	2.87671	3.89191	4.34267		1.42631	2.10304	3.41243	4.44741	5.09929			1.30888	2.07705
			YGKWRGQ	418	424	894.458	6	3.61629		1.15714	2.04698	4.02222	5.12524	5.46729		1.49547	1.97465	2.577	3.56585	4.00099		1.15818	1.63821	2.25352	2.55261	3.15034			1.08954	1.68692	3.29325	4.71061	5.21335		1.06864	1.51578	2.30149	3.02443	3.5613		1.04252	1.5983	2.75721	3.59134	4.07296
			IREGSMSE	432	439	908.414	7	2.46413		3.77147	4.28427	4.3494	4.33599	4.36285		3.68749	4.2745	4.29166	4.34102	4.26264		2.32434	3.328	4.15264	4.23112	4.23824			3.51643	4.12089	4.25671	4.27898	4.2408		3.50595	4.38638	4.53668	4.53715	4.50669		3.81003	4.49099	4.50442	4.57735	4.5148			3.47665	4.24196
			IREGSMSED	432	440	1023.44	8	2.49736		4.75585	5.2373	5.13508	5.29953	5.26035		4.55031	5.14968	5.09455	5.17874	5.26834		3.17596	4.21	4.88255	5.02934	5.01675			4.34212	4.95716	4.98419	5.03328	5.00263		3.93616	4.90203	5.05976	5.00359	5.02602		4.25524	4.98936	4.92844	5.05901	4.96312
			IREGSMSEDE	432	441	1152.48	9	2.66376		4.13127	4.78146	4.83416	4.82591	4.74594		3.9898	4.69016	4.6978	4.78181	4.74752		2.81052	3.83786	4.5899	4.65205	4.76754			3.80132	4.5676	4.66936	4.71016	4.74272		3.63399	4.52182	4.66036	4.71212	4.72246		3.8588	4.59508	4.61878	4.68088	4.71995			3.89171	4.77021
			IREGSMSEDEF	432	442	1299.55	10	4.05979		3.58644	4.23265	4.69159	4.83006	4.962		3.49726	4.15435	4.57496	4.84367	4.96779		2.39962	3.37639	4.15834	4.59098	4.89968			3.34898	4.0955	4.54793	4.69671	4.77768		3.15579	4.01282	4.53608	4.72862	4.66047		3.20562	4.1593	4.54867	4.69813	4.73001			3.36312	4.35765
			IEEAKVMM	443	450	950.469	7	3.63958																											0.643092	1.34784	2.80073	4.02973	4.57549		0.914609	1.46986	3.00123	4.43198	4.68572
			IEEAKVMMNLSHEKL	443	457	1771.91	14	4.47691		2.41506	3.56543	5.74698	7.23485	8.06275		2.27331	3.58089	5.43062	7.09631	8.0591		1.19764	2.57552	4.11746	5.58101	6.79537			1.82488	2.70906	4.4119	6.092	7.27847		1.58325	2.55694	4.22729	5.76031	6.9975		1.80732	2.84049	4.62707	6.22692	7.21095			1.79896	2.91778
			EAKVMMNLSHEKL	445	457	1529.78	12	5.27032		2.39092	3.29652	4.53054	5.23473	5.30719		2.1618	3.27393	4.47416	5.14894	5.39338		2.08878	3.04075	3.98892	4.43223	5.09444			2.18533	3.10781	4.07873	4.77052	5.25384		2.13669	3.12303	4.2468	5.03206	5.39404		2.15531	3.086	4.30584	5.09319	5.42431			2.25062	3.27572
			AKVMMNLSHEKL	446	457	1400.74	11	3.64127		1.23811	2.06925	3.40126	4.42625	5.07498		1.17553	2.13922	3.33923	4.23764	5.09538		0.764498	1.37485	2.51018	3.27273	4.15022			0.954974	1.87742	3.0903	4.09898	4.9994		0.915404	1.70946	3.02859	4.02732	4.89469		1.06044	2.05125	3.32448	4.33124	5.17013			0.974852	1.82354
			KVMMNLSHEKL	447	457	1329.7	10	3.54682		1.07304	1.69004	2.52324	3.53964	4.43828		1.01918	1.67613	2.40031	3.29584	4.26723		0.789884	1.17668	1.86759	2.46387	3.34118			1.03115	1.58786	2.29902	3.5584	4.1447		0.952136	1.55957	2.25409	3.15387	4.06905		1.10759	1.75007	2.52513	3.66934	4.25329			1.08142	1.68365
			VMMNLSHEKL	448	457	1201.61	9	3.63006																											0.864828	1.55995	2.66573	3.53586	4.30422		1.08693	1.73206	2.94952	3.8617	4.48888
			MMNLSHEKL	449	457	1102.54	8	3.83427		1.26239	1.98309	2.12664	2.40556	3.13984		0.991709	1.50293	2.01	2.39338	2.94436		1.00224	1.70289	1.66255	2.15728	2.38848			1.06054	1.65078	1.79838	2.25344	2.92853		1.04047	1.55295	1.86717	2.23392	2.64119		1.06045	1.57849	1.96395	2.29368	2.88563			1.42274	1.87517
			NLSHEKL	451	457	840.457	6	3.08465		0.585949	0.870615	0.92282	1.19591	1.46348		0.902791	1.21348	1.35702	1.67252	1.92896		0.769701	1.0135	1.23808	1.41707	1.70621			0.939258	1.26387	1.32172	1.50812	1.91123		0.923657	1.20246	1.38803	1.70244	1.96154		1.02016	1.29297	1.45841	1.77227	1.98641			0.624162	0.956285
			YGVCTKQRPIF	461	471	1311.69	9	4.11285		1.9714	2.26024	2.60302	3.0311	3.52842		1.78869	2.22042	2.54436	3.00564	3.37553		1.84333	2.19954	2.28719	2.38699	2.67485			1.75235	2.08204	2.39074	2.70114	3.25759		1.67395	2.01744	2.33699	2.79318	3.21914		1.7022	2.02383	2.36796	2.7678	3.15879			1.87262	2.18562
			YGVCTKQRPIFIIT	461	474	1638.9	12	4.76763		2.35521	2.77193	3.06367	3.59107	4.06682		2.02428	2.64774	2.98847	3.48758	3.86645		2.14482	2.57212	2.6288	2.66506	3.06409			1.92421	2.2979	2.69253	2.92084	3.49006		1.84756	2.26935	2.60488	3.10308	3.54466		1.88203	2.35518	2.62491	3.07354	3.49512			2.08118	2.53896
			YGVCTKQRPIFIITE	461	475	1767.95	13	4.77986		2.31876	2.77055	3.02654	3.60417	4.11411		2.04691	2.61247	2.85123	3.35511	3.7569		2.10972	2.54661	2.57129	2.6902	3.02837			1.8842	2.24757	2.6102	2.91292	3.54197		1.79377	2.16824	2.53795	2.98644	3.38085		1.79442	2.19194	2.55063	3.05764	3.46887			2.03754	2.44777
			GVCTKQRPIF	462	471	1148.62	8	4.10956		1.75282	2.03246	2.35796	2.72473	3.09965		1.61937	2.00308	2.26534	2.63299	2.95038		1.66461	1.99069	2.08847	2.14033	2.42154			1.58977	1.89779	2.16661	2.48718	2.94203		1.51977	1.86697	2.12651	2.56654	2.91058		1.53072	1.89621	2.13893	2.49484	2.86671			1.69697	1.95717
			TKQRPIF	465	471	889.525	5	3.35501		1.00774	1.28108	1.47413	1.59569	1.80264		1.00741	1.31535	1.44352	1.5297	1.81485		0.960232	1.2652	1.39251	1.39658	1.5342			0.92519	1.16259	1.33527	1.42606	1.65852		0.879689	1.16543	1.37708	1.43185	1.63535		0.87515	1.14	1.30248	1.36471	1.58178			0.956656	1.20847
			EYMANGCL	475	482	900.359	7	4.44014		2.75358	3.29444	3.80804	3.721	3.79627								0.939172	1.49434	1.70723	2.12372	2.70662			2.33846	2.86621	3.4235	3.48466	3.50777															2.47421	2.93893
			YMANGCL	476	482	771.316	6	4.24434		1.45675	1.96187	2.52388	2.49138	2.38893								0.719223	1.08611	1.45845	1.83995	2.40521			1.52459	1.97525	2.57253	2.62568	2.6747															1.41068	1.87232
			LNYLREMRHRFQTQQL	483	498	2133.11	15	4.34625		4.72907	5.59982	6.83571	6.97328	7.26397								4.64645	5.43946	6.60039	6.49984	6.95775																						4.87796	5.73068
			NYLREMRHRFQTQQL	484	498	2020.03	14	4.38681		6.24798	7.03304	8.06482	8.25359	8.23824								5.74005	6.6929	7.59552	7.81287	7.86964			5.37599	6.08091	7.22615	7.36869	7.60015						0					0				5.49327	6.41576
			LREMRHRFQTQQL	486	498	1742.92	12	3.08443		4.50138	5.23267	6.11055	6.153	5.87731		4.21642	4.96846	5.63062	5.98981	5.74072		4.54387	5.39671	5.86149	6.04007	5.9455			4.33775	5.01762	6.12124	6.02334	5.99257		4.226	5.05043	5.88703	5.84767	5.79059		4.07463	4.71407	5.70927	5.82468	5.79394			4.40642	5.21423
			REMRHRFQTQQL	487	498	1629.84	11	2.81878		4.8615	5.35771	5.9588	5.87518	5.60313								4.08803	4.74712	5.1567	5.32307	5.39135			4.00995	4.78326	5.31064	5.18353	5.26954		3.65432	4.63961	4.94077	4.98951	4.94722		3.68699	4.6217	4.98514	4.88346	5.08422			4.26407	5.03021
			MRHRFQTQQL	489	498	1344.7	9	2.90072		3.25399	3.88867	4.37003	4.32673	4.29219			3.45329	3.93168	3.83056	3.85539		3.0298	3.60695	4.06389	4.07213	4.05972			3.08066	3.85532	4.34627	4.39969	4.30255		2.79485	3.79576	4.21062	4.2886	4.28936		2.94609	3.702	4.14889	4.27268	4.20503			3.01801	3.74891
			CKDVCEAM	502	509	898.347	7	3.41541		0.18794	0.130414	0.140379	0.174942	0.177101		0.161775	0.20594	0.211189	0.183139	0.190913		0.079564	0.073316	0.047174	0.050368	0.092458			0.074026	0.097321	0.056226	0.040827	0.105249		0.111668	0.081318	0.043777	0.091964	0.063968		0.07659	0.081708	0.051219	0.061799	0.068912			0.222704	0.199143
			MEYLESKQFL	509	518	1287.63	9	5.00205		0.265505	0.63171	1.78648	2.76219	3.30167		0.31799	0.702011	1.64226	2.72531	3.07119		0.168276	0.582345	1.38237	2.39771	2.80322			0.310936	0.47761	1.63089	2.70627	3.31702		0.043482	0.410829	1.5783	2.81611	3.26341		0.177994	0.577805	1.41703	2.38371	3.00366			0.025185	0.391448
			EYLESKQFL	510	518	1156.59	8	4.67161		0.196318	0.586858	1.72639	2.69762	3.1962		0.29973	0.666683	1.5693	2.6545	2.9285		0.214476	0.591507	1.36902	2.35996	2.71456			0.197299	0.486394	1.56752	2.49011	3.10473		0.159663	0.489341	1.63312	2.86527	3.15707		0.134596	0.516588	1.38865	2.41044	2.89322			0.256119	0.535123
			YLESKQFL	511	518	1027.55	7	4.49808		0.074006	0.503425	1.64085	2.6946	3.0747		0.033477	0.573799	1.45101	2.39386	2.81769		0.256903	0.726441	1.5261	2.47252	2.72231			0.156844	0.500143	1.47473	2.52089	3.05898		0.130922	0.531113	1.72774	3.08497	3.51326		0.119163	0.592898	1.46088	2.6221	3.22472			0.025878	0.365821
			YLESKQFLHRDLAARNCL	511	528	2177.13	17	4.06312		0.553932	1.02102	2.77885	4.16679	4.89935		0.535093	1.36724	2.87043	3.77211	4.2284		0.448722	0.869236	2.03574	3.52309	4.05792			0.363666	0.808394	2.5088	4.08423	5.0024		0.571761	1.35704	3.10487	4.5903	5.28721		0.418424	0.894817	2.62791	3.98679	4.71306			0.348067	0.76965
			LESKQFL	512	518	864.482	6	4.02273		0.324424	0.839444	2.06648	3.25595	3.65229		0.302726	0.987308	1.84619	2.96608	3.36853		0.173996	0.733338	1.6025	2.68066	2.92613			0.175439	0.491143	1.58833	2.8459	3.49614		0.13194	0.526653	1.74	3.0861	3.47154		0.182115	0.607211	1.58001	2.72344	3.17909			0.312852	0.648574
			ESKQFLHRDLAARNCL	513	528	1900.98	15	3.59799		0.500933	1.07823	2.51303	3.79666	4.36083		0.524883	1.35766	2.64847	3.28475	3.77923		0.405465	0.846696	1.80434	3.00783	3.45363			0.327219	0.815472	2.30486	3.64581	4.29172		0.537864	1.52886	2.95384	4.04816	4.81804		0.324931	0.839975	2.3617	3.51661	3.97491			0.481677	0.894132
			FLHRDLAARNCL	517	528	1428.75	11	3.58915		0.161982	0.611082	1.34042	1.99201	2.35311		0.30001	0.916178	1.66982	1.8591	2.17552		0.12912	0.28512	0.932668	1.59725	1.96821			0.198205	0.377239	1.17206	1.86436	2.12217		0.392507	1.01681	1.66337	2.01234	2.68671		0.194086	0.405526	1.21317	1.85367	2.06487			0.24738	0.571122
			LHRDLAARNC	518	527	1168.6	9	2.38677		0.268592	0.32192	1.08961	1.59371	1.8168		0.312902	0.588316	1.50921	1.56475	1.62553		0.14473	0.081576	0.66171	1.26629	1.55615																						0.34554	0.45538
			HRDLAARNCL	519	528	1168.6	9	2.84255		0.542888	0.771516	1.4924	1.94372	2.17282		0.641095	1.08489	1.8016	1.92419	1.99786		0.402758	0.51077	0.89108	1.61749	1.77252			0.340316	0.46691	1.1209	1.66408	1.80852		0.554916	1.05218	1.57436	1.82823	2.2092		0.347025	0.499579	1.27125	1.64944	1.76302			0.626276	0.714474
			RNCLVNDQGVVKVSDF	525	540	1792.9	15	4.5345		1.79493	2.56148	3.10968	3.5608	3.90875		1.02942	1.80179	1.96956	2.31725	2.64132		1.10417	1.83143	2.21763	2.3126	2.34532			1.46259	2.27953	2.76077	3.13884	3.67313		0.853807	1.71439	1.9863	2.49422	2.82717		1.01587	1.80463	2.1876	2.63821	2.86961			1.47134	2.34576
			RNCLVNDQGVVKVSDFGL	525	542	1963.01	17	4.86705		1.5689	2.71031	4.22981	4.63048	5.11164		0.887592	1.77174	2.54248	3.39703	3.83289		0.875751	1.7018	2.07144	2.33362	2.34476																						1.23276	2.40449
			CLVNDQGVVKVSD	527	539	1375.69	12	3.738		1.94841	2.64987	2.76152	3.00227	3.34911		1.28485	2.00371	2.20194	2.41054	2.63136		1.29532	2.05638	2.46228	2.53786	2.58456			1.68205	2.49577	2.6096	2.82191	3.19963		0.984459	1.8918	2.20713	2.53509	2.64145		1.12585	2.12616	2.12582	2.45523	2.67853			1.64662	2.4882
			CLVNDQGVVKVSDF	527	540	1522.76	13	4.80129		1.70897	2.48188	3.07873	3.41775	3.79238		1.05732	1.76175	2.05769	2.33865	2.58427		1.07506	1.85658	2.24234	2.32883	2.41855			1.49746	2.33502	2.9427	3.27981	3.60219		0.897827	1.66713	2.0976	2.4155	2.70261		1.01249	1.93436	2.26125	2.54927	2.75748			1.44398	2.39103
			VNDQGVVKVSD	529	539	1159.6	10	2.85725		1.43686	2.07849	2.28687	2.45368	2.75325		0.979652	1.68502	1.88413	2.1813	2.37562		0.944746	1.65931	2.10351	2.14706	2.211			1.3425	1.97412	2.15709	2.3595	2.62484		0.792148	1.44433	1.78316	2.05082	2.13901		0.96857	1.64414	1.85942	2.09815	2.32622			1.16133	1.93222
			VNDQGVVKVSDF	529	540	1306.66	11	4.30265		1.76617	2.42133	3.03677	3.32442	3.60539		0.819366	1.4385	1.68342	2.01232	2.26776		0.760347	1.38591	1.77218	1.85121	1.8539			1.18014	1.87035	2.416	2.73939	3.06164		0.70991	1.31188	1.69941	2.06435	2.33185		0.864329	1.57367	1.894	2.21163	2.45625			1.2015	1.96277
			VNDQGVVKVSDFGL	529	542	1476.77	13	5.08414		1.48651	2.59313	3.93234	4.39701	4.68322		0.799134	1.49651	2.32232	3.23115	3.60252		0.715962	1.31004	1.6734	1.75833	1.89481			1.20722	2.24572	3.59777	4.08093	4.44277		0.657909	1.28334	2.14416	3.13532	3.4347		0.772673	1.68963	2.48685	3.1817	3.50927			1.009	2.36432
			VNDQGVVKVSDFGLS	529	543	1563.8	14	4.67819		2.01831	3.53963	4.81066	5.56874	5.80493		1.26528	2.47783	3.38019	4.32808	4.61588		0.973472	1.94966	2.56364	2.78194	2.91016			1.54425	3.15615	4.67595	5.14963	5.48605		0.969514	2.09354	3.08882	4.11413	4.5023		1.05921	2.36349	3.44445	4.188	4.57092			1.73386	3.43064
			VNDQGVVKVSDFGLSR	529	544	1719.9	15	4.28898		2.53465	4.35464	5.98015	6.37056	6.72762		1.73122	3.11142	4.12773	5.23382	5.50695		1.61045	2.73598	3.50879	3.61697	3.82385			2.21762	3.96487	5.59496	6.05989	6.41035		1.49353	2.89475	3.97547	5.11235	5.50082		1.61669	3.18412	4.25687	5.23453	5.65144			2.25098	4.1043
			VNDQGVVKVSDFGLSRY	529	545	1882.97	16	4.71269		2.52654	4.42933	6.43319	6.6787	6.93613		1.77692	3.35701	4.6578	5.71179	6.02592		1.46089	2.49961	3.25091	3.33673	3.72115			2.19949	4.04757	6.08721	6.61967	6.99671		1.54196	3.08723	4.55532	5.59738	5.97009		1.57543	3.38003	4.74287	5.66147	6.02664			2.16468	4.1491
			VNDQGVVKVSDFGLSRYVL	529	547	2095.12	18	5.49519		3.06844	5.75189	8.09082	8.47673	8.76391		2.34157	4.68773	6.53503	7.4422	7.78162		1.66152	3.11535	4.21374	4.67	5.43981			2.45376	4.98826	7.71169	8.23896	8.5542		1.60975	3.71931	5.95607	7.09352	7.38995		1.81764	4.17801	6.24607	7.11371	7.50277			2.67762	5.44071
			VNDQGVVKVSDFGLSRYVLDD	529	549	2325.17	20	5.31938		3.55982	6.42799	8.72207	9.30059	9.34017		2.93661	5.16367	7.14897	7.88784	8.32417		2.65283	4.02476	5.22573	6.18372	6.42389			3.14467	5.58436	8.48319	8.83484	9.16247		2.29028	4.39719	6.62563	7.6617	8.11873		2.58425	5.01077	7.01417	7.86365	8.38077			3.07589	5.83646
			VNDQGVVKVSDFGLSRYVLDDE	529	550	2454.21	21	5.32956		3.7856	6.48636	8.99516	9.37394	9.56925		3.23084	5.38604	7.26594	7.93042	8.57026		2.49585	3.94904	5.02587	5.54789	6.41708			3.37712	5.85587	8.73715	9.04723	9.32292		2.43632	4.58874	6.89338	7.80106	8.43962		2.71871	5.03841	7.28428	8.38847	8.35945			3.27927	5.93196
			VVKVSDFGL	534	542	963.551	8	4.90248																											0.138788	0.169874	0.913238	2.04383	2.38611		0.356118	0.692612	1.18274	2.08998	2.43069
			FGLSRYVL	540	547	954.541	7	5.25		1.33283	2.78405	4.15445	4.19995	4.1397		1.19609	2.52454	3.88479	4.20116	4.20217		0.662156	1.29037	1.95323	2.35363	2.99015			1.1743	2.48034	3.97402	4.08629	4.11919		0.879175	2.05958	3.56338	4.02904	4.05981		0.995597	2.32131	3.71059	4.03947	4.05775			1.06	2.4823
			FGLSRYVLDD	540	549	1184.59	9	4.94377		2.17592	3.71485	5.22264	5.26368	5.23039		2.05099	3.47288	4.90355	5.18758	5.11358		1.50726	2.23254	2.88674	3.25159	3.895			1.9123	3.32693	5.01546	5.12027	5.07808		1.65208	2.94579	4.60976	5.11271	5.08362		1.77099	3.23687	4.70088	5.02758	5.05743			1.83679	3.43603
			FGLSRYVLDDE	540	550	1313.64	10	4.9518		2.52435	4.0499	5.62572	5.54842	5.62435		2.46591	3.80145	5.16954	5.50194	5.49023		1.81471	2.63985	3.28399	3.67015	4.31699			2.26229	3.7099	5.35209	5.46478	5.45841		2.03645	3.34951	4.90694	5.41542	5.3425		2.19673	3.59208	5.00772	5.38291	5.37455			2.20479	3.78759
			GLSRYVL	541	547	807.472	6	4.44503		1.36246	2.73083	3.9028	3.92291	3.91777		1.22828	2.69658	3.75199	3.83795	3.86502		0.693904	1.4318	2.13847	2.58429	3.15358			1.16739	2.45827	3.7854	3.82107	3.81366		0.975483	2.4087	3.83526	3.97748	3.96649		1.1462	2.64912	3.91647	3.97569	4.01752			1.12946	2.55087
			GLSRYVLDD	541	549	1037.53	8	4.14813		2.1575	3.54264	4.70406	4.71287	4.73559		2.22588	3.68062	4.78914	4.85752	4.78021		1.60108	2.35699	3.06202	3.41136	4.06896			2.06143	3.40868	4.68286	4.70707	4.70747		1.83733	3.14922	4.52184	4.64726	4.69119		1.97751	3.33327	4.60933	4.69828	4.62689			2.0179	3.44693
			GLSRYVLDDE	541	550	1166.57	9	4.20101		2.68683	4.14239	5.26223	5.23617	5.25604		2.6646	3.99935	5.1115	5.21463	5.19503		2.05726	2.64809	3.57522	3.94269	4.90078			2.45874	3.79456	5.1503	5.2068	5.2497		2.22157	3.50192	4.8912	5.16861	5.12303		2.38299	3.73328	4.96685	5.13466	5.08793			2.46827	3.85032
			SRYVLDD	543	549	867.421	6	3.39175		1.48283	2.46187	3.51052	3.43147	3.37669		1.42273	2.56278	3.22712	3.38803	3.31147		1.17405	1.71297	1.98278	2.38883	2.95903			1.41529	2.22399	3.34717	3.3803	3.44667		1.13101	2.12767	3.45447	3.54312	3.52863		1.34252	2.3693	3.41074	3.49822	3.58956			1.32107	2.20749
			SRYVLDDE	543	550	996.463	7	3.50835		1.80982	2.81822	3.77047	3.84196	3.74509		1.96673	2.88551	3.76725	3.86322	3.77776		1.41924	1.9213	2.1692	2.71989	3.27474			1.63653	2.58928	3.67838	3.69808	3.72392		1.51047	2.28451	3.4989	3.67618	3.63632		1.5865	2.51858	3.5687	3.66441	3.65429			1.50955	2.50258
			EYTSSVGSKF	550	559	1104.52	9	3.65111		4.82724	4.9575	5.01261	4.91051	4.89687		4.70437	5.04632	5.02999	5.05617	4.89612		4.5051	4.9319	4.95815	4.87984	4.80972			4.63514	4.76619	4.87652	4.90884	4.87019		4.56829	4.66054	4.9133	4.8829	4.91836		4.61755	4.7705	4.9364	4.8313	4.86021			4.74351	5.05762
			EYTSSVGSKFPVRWSPPEVL	550	569	2265.16	16	5.22855		5.26315	5.89187	7.34564	9.10629	9.80321		5.17618	5.8592	7.45807	9.0383	9.6817		5.00235	5.6868	7.04802	8.88226	9.64738			5.46527	5.85541	7.14677	8.91499	9.66447		5.43308	6.30678	8.23919	9.45618	9.76419		5.39456	5.86215	7.31454	9.06847	9.71397			5.32963	5.77508
			EYTSSVGSKFPVRWSPPEVLM	550	570	2396.2	17	5.24106		5.29569	5.81262	7.70246	9.82461	10.3109		4.8013	6.43979	7.98395	9.5148	10.2678		5.15465	5.94799	7.5328	9.44753	10.1692																						5.23582	6.05111
			YTSSVGSKF	551	559	975.478	8	3.44493		4.31817	4.28421	4.54696	4.56917	4.17057		4.25759	4.34045	4.46424	4.51619	4.44832		3.69553	4.15152	4.19963	4.32214	4.37542			3.84433	4.01569	4.07379	4.07902	4.12337		3.69196	3.94044	4.05208	4.14919	4.15219		3.78763	3.96427	4.12987	4.13288	4.09812			3.96115	4.28461
			YTSSVGSKFPVRWSPPEVL	551	569	2136.11	15	4.92741		4.64731	5.07203	6.43424	8.31592	8.86071		4.60944	5.36412	6.70737	8.34851	9.02119		4.19799	5.02651	6.17315	8.09857	8.81004																						4.65722	5.21269
			YTSSVGSKFPVRWSPPEVLM	551	570	2267.15	16	5.42935		4.65351	5.40668	7.10736	8.73388	9.3249		4.4656	5.72121	7.35127	8.89356	9.32759		4.40259	5.27705	6.9678	8.79696	9.65224			4.51409	5.01878	6.97162	8.46603	9.32363		4.33413	5.43845	8.11774	9.14758	9.37852		4.29482	5.03374	6.77854	8.61196	9.15332			4.40893	5.1018
			TSSVGSKFPVRWSPPEVL	552	569	1973.05	14	5.08937		4.74667	5.13203	6.70981	8.45676	8.85515		4.64308	5.23253	6.86678	8.33923	8.80734		4.15073	4.84826	6.04971	8.00065	8.67332			4.39822	4.80504	6.00773	7.83712	8.55695		4.34234	5.03064	6.98262	8.30627	8.52943		4.3318	4.83718	6.26371	8.00206	8.57233			4.45898	5.16375
			PVRWSPPEVL	560	569	1179.65	6	5.02692		0.614484	0.853648	2.24929	3.95257	4.45486		0.606565	0.948717	2.36699	3.72998	4.28123		0.492577	0.745769	1.93105	3.51289	4.25631			0.56432	0.786383	1.80804	3.28749	4.29691		0.593456	1.09821	2.68901	3.8556	4.07907		0.484256	0.764001	1.97247	3.43365	3.99811			0.615512	0.879837
			MYSKFSSKSDI	570	580	1292.62	10	3.37251																											1.26472	2.41931	3.51331	3.7481	3.77868		1.21758	2.14107	3.37874	3.70388	3.58391
			MYSKFSSKSDIWA	570	582	1549.74	12	4.43615		0.936367	1.80622	2.68666	2.68941	2.88573		1.06207	1.96668	2.8044	3.04476	2.99638		0.989411	1.81311	2.706	2.94097	3.04814			1.25763	2.07863	3.16086	3.26064	3.38979		1.11055	2.05769	2.83646	3.18434	3.35699		0.999935	1.8799	2.90706	3.04389	3.13636			1.11331	2.03049
			MYSKFSSKSDIWAF	570	583	1696.8	13	5.16931		0.980301	1.76708	2.55008	2.57944	2.76331		0.871632	1.75156	2.61012	2.82648	2.72674		0.87087	1.60164	2.44533	2.80523	2.79621																						0.925449	1.67201
			YSKFSSKSDIWA	571	582	1418.7	11	4.21352		1.10506	1.88358	2.73948	2.86515	2.88848		0.965929	1.69239	2.59097	2.75743	2.82828		0.912342	1.56781	2.46992	2.72245	2.7867			0.995766	1.73195	2.67497	2.85433	2.92549		0.975623	1.81083	2.71123	2.92386	3.15603		0.866144	1.55339	2.52108	2.75311	2.84448			0.966189	1.70931
			YSKFSSKSDIWAF	571	583	1565.76	12	5.30137		0.901648	1.65933	2.45883	2.63332	2.67953		0.796698	1.51267	2.35594	2.55278	2.64315		0.766711	1.44739	2.26361	2.51588	2.58415			0.859177	1.60939	2.46966	2.5678	2.66416		0.847432	1.67242	2.52778	2.74678	2.92561		0.774836	1.45817	2.38472	2.58596	2.6895			0.783092	1.50716
			SSKSDIWA	575	582	893.436	7	3.93448		0.404934	0.537669	1.10936	1.3084	1.3484		0.445745	0.598326	1.09444	1.30851	1.35228		0.351273	0.467442	0.943928	1.21982	1.30097			0.414597	0.58922	1.09866	1.39967	1.46711		0.476147	0.785305	1.25498	1.4994	1.73036		0.419616	0.616831	1.09745	1.41822	1.41991			0.457523	0.597295
			SSKSDIWAF	575	583	1040.5	8	5.44518		0.312847	0.433889	0.867964	0.982568	1.04027		0.283409	0.35034	0.725642	0.943278	0.947486		0.17076	0.283656	0.667061	0.863653	0.876487			0.311301	0.404591	0.799405	0.961856	1.02321		0.285667	0.440097	0.878471	1.05625	1.21738		0.283896	0.350204	0.726871	0.911526	0.9626			0.323339	0.436665
			MWEIYSL	587	593	941.444	6	6.37904		0.0785555	0.050046	0.113123	0.248503	0.561745		-0.0009675	-0.028565	0.0317895	0.215588	0.563554		-0.0121955	-0.0480045	0.052096	0.140048	0.510936			0.0604145	0.048325	0.0664865	0.180335	0.470003		0.03101	0.04574	0.24269	0.581581	0.705945		0.004399	0.012891	0.012852	0.152694	0.448261			0.064717	0.0705715
			MWEIYSLGKMPYERF	587	601	1949.93	13	5.96737		1.70882	3.09319	4.09791	5.00619	5.6328		1.75676	3.26838	4.21853	5.24874	5.7721		1.69632	3.15735	4.05168	5.1092	5.65737			1.6106	2.85578	3.94842	4.78766	5.61348		1.78511	3.561	4.82204	5.48933	5.6241		1.57353	3.1312	4.08387	5.09397	5.62785			1.47329	2.83335
			MWEIYSLGKMPYERFTNSE	587	605	2381.09	17	5.75924		3.14929	5.26433	6.4286	7.29219	7.9608		3.23795	5.56433	6.54703	7.52337	8.14959		3.04543	5.02731	6.23854	7.0271	7.91203			2.76204	4.82699	6.111	6.78898	7.7211		3.31721	5.6828	6.96413	7.72825	7.84129		2.77676	4.9339	6.07776	7.0197	7.63414			2.59939	4.74862
			WEIYSLGKM	588	596	1126.56	8	5.54328		0.53433	0.742617	1.32029	2.40568	2.9249		0.50672	0.859833	1.33727	2.28711	3.06809		0.676635	0.964735	1.36294	2.38065	3.11787			0.51875	0.871476	1.13285	2.19686	2.77035		0.620104	1.25144	2.33634	2.92422	3.06086		0.440497	0.809539	1.28583	2.14807	2.87669			0.494372	0.935164
			WEIYSLGKMPYE	588	599	1515.72	10	5.69326		0.891078	2.03001	2.62564	3.67367	4.236		0.993032	2.26095	2.87297	3.94937	4.46844		0.895178	2.08793	2.62002	3.58025	4.35471			0.790396	1.94375	2.52056	3.29059	4.10127		0.97007	2.38837	3.59534	4.18732	4.43089		0.765819	1.92045	2.61842	3.47864	4.16833			0.72145	1.90362
			WEIYSLGKMPYERF	588	601	1818.89	12	5.72137		1.72346	3.01945	4.1027	4.98835	5.63331		1.73917	3.27549	4.19839	5.11659	5.63261		1.52174	2.78943	3.73824	4.65334	5.4113			1.51293	2.71119	3.66344	4.54906	5.3715		1.72412	3.4495	4.62188	5.19888	5.36521		1.45856	2.80474	3.78445	4.58093	5.20595			1.41636	2.69421
			WEIYSLGKMPYERFTNS	588	604	2121.01	15	5.29919		2.76103	4.49977	5.71028	6.59359	7.36201		2.8458	4.92038	5.82925	6.95682	7.28169		2.67081	4.34467	5.63135	6.42838	7.18885																						2.59116	4.25894
			WEIYSLGKMPYERFTNSE	588	605	2250.05	16	5.51805		3.43792	5.36866	6.37455	7.41213	8.20507		3.2791	5.56981	6.5119	7.47825	8.02154		3.12052	5.14767	6.27875	7.16352	7.8388			3.08451	5.31092	6.45469	7.30293	8.12201		3.44369	6.03899	7.57496	8.08746	8.3542		2.99001	5.27738	6.41053	7.41005	7.93411			2.86371	5.0567
			WEIYSLGKMPYERFTNSETAE	588	608	2551.18	19	5.47724		3.35613	5.93275	8.34395	9.26957	9.97778		3.42999	6.65485	8.50543	9.54258	10.093		3.32951	6.13737	8.19045	9.521	9.98152			2.86019	5.36554	7.78338	8.77536	9.73489		3.57979	6.75297	8.75384	9.40831	9.50691		2.9302	5.5901	7.80795	8.77789	9.35327			2.77816	5.23543
			IYSLGKMPYERF	590	601	1503.77	10	4.91803		1.92193	3.73822	4.42961	5.49917	6.30163								1.89481	3.57543	4.51636	5.47558	6.20926			1.79747	3.13256	4.24108	5.15895	6.02725		1.98622	4.05275	5.33354	6.00003	6.11708		1.62579	3.34496	4.21231	5.39743	5.87803			1.86454	3.49793
			IYSLGKMPYERFTNSE	590	605	1934.93	14	4.72787		3.75794	5.81496	6.60464	7.86071	8.49389		3.96066	6.06634	7.18622	8.25971	8.77637		3.65649	5.79114	6.64668	8.00484	8.56654			3.04693	5.24066	6.53248	7.45151	8.30786		3.63368	6.32819	7.60367	8.37531	8.54163		3.282	5.63575	6.66608	7.73653	8.29985
			IYSLGKMPYERFTNSETAE	590	608	2236.06	17	4.7016		3.8793	6.81114	9.0947	10.1605	10.6289		3.69824	6.99939	8.90265	9.93599	10.379		3.54406	6.44837	8.48008	9.85063	10.3986			3.08202	5.71091	8.29578	9.4729	10.1888		3.74014	7.4748	9.51664	10.2358	10.3831		3.12948	5.93337	8.51211	9.52096	10.2126			3.54706	6.16914
			YSLGKMPYERFTNSETAE	591	608	2122.97	16	4.51563								3.88611	7.61085	9.19606	10.2786	10.8617		3.71786	6.60989	8.78593	9.92484	10.4914			3.08429	6.04401	8.40901	9.63682	10.2251		3.60632	7.66489	9.44933	10.2642	10.5884		2.96201	6.41681	8.45214	9.47536	10.1264
			GKMPYERF	594	601	1027.5	6	3.81465		1.49932	2.95815	3.78376	3.73141	3.74692		1.68624	3.16971	3.77038	3.72116	3.69478		1.6073	2.87265	3.71363	3.60831	3.68575									1.65072	3.23862	3.62412	3.57736	3.54351		1.46181	2.81556	3.57645	3.55788	3.52945			1.39616	2.79746
			GKMPYERFTNSE	594	605	1458.67	10	3.78843		3.2179	5.32149	6.09431	6.1348	6.18314		3.24369	5.52672	6.00079	6.15548	6.10541		2.97289	5.23707	5.90085	5.89243	5.9699			2.86002	5.0729	6.05748	6.06674	6.12906		3.40146	5.49959	6.01907	6.08016	6.13862		2.93642	5.16517	6.04827	6.04292	6.00674			2.7566	5.00464
			GKMPYERFTNSETAE	594	608	1759.8	13	3.79798		3.24393	5.89062	8.02773	8.08777	8.11215		3.29039	6.33875	7.95583	7.89667	7.81113		3.12363	5.64558	7.67671	7.79481	7.78007			2.9176	5.43982	7.86764	8.03343	8.08977		3.6572	6.78988	8.07964	8.06909	7.98932		3.00555	5.64352	7.98203	8.08976	8.14679			2.66641	5.13457
			RFTNSETAE	600	608	1054.48	8	2.39589		1.81632	3.18639	4.97282	4.59318	4.64923								1.89731	3.11529	4.70438	4.67539	4.67591			1.52213	2.79122	4.24457	4.53205	4.50837		1.90709	3.77453	4.47578	4.60619	4.50669		1.66509	2.85918	4.44272	4.53985	4.54916
			TNSETAEHIAQGLRLPRPHL	602	621	2240.19	17	4.47411																											4.35663	7.37231	9.71938	10.2548	10.5746		3.84717	5.89969	9.42573	10.0087	10.2755
			TNSETAEHIAQGLRLPRPHLAS	602	623	2398.26	19	4.30722		4.75292	6.78266	10.6164	11.4151	11.9776		4.74738	7.7155	10.5311	11.3817	11.9623		4.64953	6.50908	10.1352	11.1515	11.9531			4.25137	6.02878	9.59562	10.8928	11.5144		4.83713	7.83435	10.5605	11.2126	11.832		4.17444	6.25942	9.86628	10.864	11.5054			4.38805	6.12287
			TAEHIAQGLRLPRPHL	606	621	1809.02	13	4.0558		3.33576	4.34763	6.57887	7.27522	7.71539		3.37444	4.7517	6.85095	7.37854	7.75977		3.22233	4.33265	6.51858	7.14563	7.54524			3.13812	4.00771	6.22642	7.0441	7.48439		3.28479	4.8838	6.88492	7.28822	7.65957		3.13149	4.21816	6.41335	7.09209	7.46122			3.16429	4.09263
			TAEHIAQGLRLPRPHLAS	606	623	1967.09	15	3.83453		3.83658	4.84761	7.25814	8.03835	8.84178		3.75341	5.15557	7.43459	8.19509	8.89553		3.63982	4.82571	6.91857	7.91835	8.69106			3.54778	4.4867	6.76509	7.83637	8.50413		3.90771	5.55521	7.72722	8.41703	9.02578		3.58631	4.80309	7.20682	8.06744	8.79706			3.54483	4.57939
			TAEHIAQGLRLPRPHLASE	606	624	2096.14	16	3.87443		3.98717	5.05342	7.3177	8.26303	8.91231		4.0271	5.48204	7.66179	8.26275	9.01432		3.92212	5.15519	7.27565	8.13605	8.63569			3.87779	4.74619	7.05114	8.07358	8.72403		4.47559	6.1828	8.22733	8.95721	9.56479		4.06906	5.42241	7.80859	8.71525	9.32237			3.82734	4.8472
			AEHIAQGLRLPRPHLAS	607	623	1866.05	14	3.38511		3.38099	4.14575	5.88434	6.74369	7.46129		3.40459	4.45705	6.17031	6.93465			3.4349	4.3362	5.89441	6.89228	7.37218																						3.22102	4.22675
			HIAQGLRLPRPHL	609	621	1507.9	10	3.82616		3.12433	3.87456	5.22826	5.51619	5.94128		3.01954	3.98744	5.09526	5.47722	5.87162		3.08282	3.81207	5.0491	5.357	5.79468			2.89818	3.51467	4.91515	5.22095	5.57011		2.9878	3.91498	5.14224	5.49467	5.79898		2.8351	3.58336	4.91352	5.26594	5.64443			3.02181	3.68184
			HIAQGLRLPRPHLAS	609	623	1665.97	12	3.58063		3.50421	4.15437	5.64598	6.26597	6.86211		3.32829	4.30736	5.44063	6.10571	6.8422		3.34998	4.18436	5.3922	6.0144	6.73268			3.38216	4.07267	5.64466	6.13346	6.79827		3.49854	4.65725	5.87238	6.50877	7.15936		3.39764	4.2449	5.5757	6.18912	6.89463			3.34146	4.02612
			HIAQGLRLPRPHLASE	609	624	1795.01	13	3.61602		3.98318	4.70531	6.12279	6.62723	7.33313		3.82098	4.82248	6.08663	6.61315	7.32927		3.70256	4.66577	5.78368	6.4413	7.03808			3.70366	4.36772	5.82348	6.34116	7.01018		3.80534	4.95525	6.10128	6.75991	7.35683		3.59576	4.3876	5.854	6.44734	7.09059			3.84109	4.6001
			LRLPRPHLAS	614	623	1159.71	7	3.43938		2.25943	2.2638	2.40801	2.71263	3.33457		2.23979	2.35273	2.40515	2.82481	3.46125		2.14889	2.24691	2.33531	2.788	3.37474			2.08968	2.13846	2.23081	2.57301	3.22481		2.10432	2.14799	2.31897	2.91267	3.50267		2.09428	2.18226	2.20833	2.63157	3.27394			2.29719	2.37461
			LRLPRPHLASE	614	624	1288.75	8	3.48306																											2.66628	2.72125	2.87248	3.45849	4.01798		2.60786	2.80895	2.79433	3.16638	3.85545
			ASERVYTIM	622	630	1069.53	8	4.52834		2.19026	2.88131	3.33365	3.96855	4.58826		1.99613	2.86804	3.31743	4.05515	4.54449		1.99207	2.62262	3.11005	3.9365	4.42927			1.83705	2.68136	3.20629	3.78542	4.07983		1.75594	2.63945	3.11635	3.63355	4.2378		1.82499	2.50371	3.16591	3.74389	4.28393			2.04629	2.73181
			ERVYTIM	624	630	911.466	6	4.17623		0.157639	0.313722	0.898927	1.51146	1.92554		0.16147	0.329878	1.03197	1.55013	1.95773		0.035769	0.253187	0.8703	1.46921	1.87864			0.0946347	0.215663	0.837074	1.27714	1.80277		0.037846	0.129409	0.69284	1.23215	1.69589		0.062676	0.139029	0.747087	1.22733	1.69334			-0.0346635	0.0509665
			YSCWHEKA	631	638	1023.44	7	3.19697																											1.42211	1.83752	1.97157	2.04276	2.00371		1.11274	1.91162	2.06306	2.17552	2.18073
			YSCWHEKADERPSF	631	644	1754.76	12	3.96698		1.54623	2.29196	3.00633	3.79089	4.13602		1.51688	2.34277	2.99949	3.85138	4.27201		1.50011	2.26774	2.92263	3.75209	4.22388			1.57768	2.258	3.01978	3.78568	4.24648		1.55812	2.28513	2.99527	3.77882	4.21812		1.5067	2.18913	2.91935	3.70399	4.16015			1.60447	2.30637
			SCWHEKADERPSF	632	644	1591.7	11	3.96782		1.44765	2.15192	2.85723	3.57923	3.93237		1.44777	2.16614	2.79795	3.58738	4.06557		1.42174	2.04842	2.7787	3.45751	3.90828			1.3949	2.04466	2.6911	3.47404	3.88526		1.37186	2.01454	2.67244	3.4329	3.81437		1.33727	2.08003	2.69701	3.53889	3.85309			1.41827	2.04536
			CWHEKADERPSF	633	644	1504.66	10	3.9671		1.66392	2.35833	2.93542	3.62428	3.92551		1.43706	2.20672	2.76167	3.57132	4.03072		1.46722	2.11461	2.77461	3.48258	3.9154			1.38392	2.06067	2.59803	3.40845	3.84149															1.53195	2.16643
			WHEKADERPSF	634	644	1401.65	9	2.9613		1.49598	2.28204	3.04128	3.94364	4.29735		1.51928	2.2965	3.04248	3.73457	4.31681		1.42964	2.27925	2.92612	3.66686	4.08486																						1.49916	2.19997
			HEKADERPSF	635	644	1215.58	8	2.7496		1.12909	1.79681	2.48753	3.29388	3.66346		1.29633	2.022	2.55237	3.48401	3.88965		1.31325	2.00125	2.65186	3.4449	3.90674			1.31808	1.99339	2.45768	3.4665	3.83022		1.35142	2.02247	2.68732	3.42203	3.81659		1.25457	1.98775	2.60223	3.44895	3.80501			1.24648	1.86435
			KILLSNIL	645	652	913.608	7	5.34761		0.045163	0.0353865	0.0804435	0.266879	0.692468		0.0834408	0.0764575	0.107824	0.28501	0.753883		0.0255345	-0.00934	0.069472	0.192624	0.670723			0.0613745	0.0401955	0.079208	0.205038	0.582577		0.075377	0.038879	0.087331	0.21441	0.606079		0.060086	0.029734	0.060027	0.207121	0.587135			0.0535635	0.046328
			KILLSNILDV	645	654	1127.7	9	5.76777		0.078775	0.088134	0.208821	0.710553	1.60727		0.125107	0.111577	0.247167	0.79072	1.89136		0.032741	0.00116	0.197794	0.623236	1.75897			0.047888	0.063778	0.119306	0.469613	1.39086		0.041987	0.054635	0.124096	0.527486	1.47362		0.049279	0.089407	0.107407	0.526505	1.45313			0.128641	0.073934
			DVMDEESHHHHHH	653	665	1646.65	12	2.09014		2.3354	2.69819	2.82097	2.65371	2.78056		2.25674	2.71878	2.75188	2.82137	2.7705		2.11107	2.53688	2.63055	2.63084	2.69692			2.08985		2.37021	2.59224	2.56325															2.02478	2.491
			MDEESHHHHHH	655	665	1432.56	10	1.97393		1.62568	1.83314	2.02073	1.9633	2.00334		1.6275	1.88235	2.04694	2.02514	1.98573		1.49639	1.6891	1.98061	1.78485	1.99047									1.50017		1.81081	1.55098	1.79149		1.31645	1.83991	1.79103		1.90347			1.56205	1.74604
			DEESHHHHHH	656	665	1301.52	9	1.33586		1.37326	1.49796	1.60045	1.6035	1.61293		1.27067	1.52838	1.62945	1.66238	1.53464		1.28422	1.41659	1.6861	1.60198	1.5162																						1.33191	1.50507
			*Puprple = Data in Figure 4 panel c
[truncated: 132 more columns]

## Sheet: Figure 6
		Relative Deuterium Incorporation: ALL DATA																										Relative Difference: ALL DATA (Mutant BTK - WT BTK)																				Relative Difference: ALL DATA (Mutant BTK - WT BTK)
									WT BTK4						T474I BTK						L528W BTK														T474I BTK vs WT BTK4						L528W BTK VS WT BTK4
		Sequence	Start	End	MHP	MaxUptake	RT		10 sec	1 min	10 min	1 hour	4 hours		10 sec	1 min	10 min	1 hour	4 hours		10 sec	1 min	10 min	1 hour	4 hours			Sequence	Start	End	MHP	MaxUptake	RT		10 sec	1 min	10 min	1 hour	4 hours		10 sec	1 min	10 min	1 hour	4 hours			Sequence	Start
		AAVILES	2	8	702.403	6	3.50991		1.43406	2.20447	3.23838	3.73141	3.91589		1.4389	2.29798	3.26412	3.76007	3.99363		1.45017	2.45469	3.29012	3.72024	3.93504			AAVILES	2	8	702.403	6	3.50991		0.004843	0.093513	0.025736	0.02866	0.077741		0.016112	0.250226	0.05174	-0.011177	0.019158			AAVILES	2
		IFLKRSQQKKKTSPLNF	9	25	2063.21	15	3.42301		6.31534	6.38306	6.38107	6.46735	6.5952		6.15615	6.3785	6.31632	6.26389	6.33673		6.08631	6.33187	6.29141	6.4378	6.48699			IFLKRSQQKKKTSPLNF	9	25	2063.21	15	3.42301		-0.159185	-0.004561	-0.06475	-0.203453	-0.258472		-0.229031	-0.051196	-0.089654	-0.029551	-0.108213			IFLKRSQQKKKTSPLNF	9
		LKRSQQKKKTSPLNF	11	25	1803.06	13	2.35942		6.51779	6.69718	6.67467	6.64362	6.63813		6.45522	6.49772	6.40201	6.45899	6.4512		6.56905	6.76556	6.7485	6.78862	6.75208			LKRSQQKKKTSPLNF	11	25	1803.06	13	2.35942		-0.062569	-0.199462	-0.27266	-0.184633	-0.186932		0.05126	0.068375	0.073828	0.145003	0.113956			LKRSQQKKKTSPLNF	11
		LTVHKLSYYE	32	41	1252.66	9	3.9901		0.485445	1.17344	2.05741	2.5753	2.65877		0.480228	1.1948	2.02008	2.5484	2.83143		0.517371	1.24084	2.26859	2.6843	2.76852			LTVHKLSYYE	32	41	1252.66	9	3.9901		-0.005217	0.021367	-0.037325	-0.026894	0.172661		0.031926	0.0674	0.211184	0.109	0.109756			LTVHKLSYYE	32
		LTVHKLSY	32	39	960.551	7	2.99714		0.383214	0.840626	1.26032	1.30993	1.4537		0.459763	0.917929	1.28203	1.38033	1.53827		0.52352	1.01562	1.37373	1.45042	1.6188			LTVHKLSY	32	39	960.551	7	2.99714		0.076549	0.077303	0.021713	0.070398	0.084566		0.140306	0.174997	0.113411	0.140491	0.165096			LTVHKLSY	32
		TVHKLSY	33	39	847.467	6	2.99716		0.392692	0.780022	1.23432	1.22516	1.37861		0.427523	0.847434	1.24343	1.28379	1.42933		0.432516	0.845711	1.26891	1.30848	1.41897			TVHKLSY	33	39	847.467	6	2.99716		0.034831	0.067412	0.009108	0.058631	0.050724		0.039824	0.065689	0.034589	0.083326	0.040362			TVHKLSY	33
		YEYDFERGRRGSKKGSIDVE	40	59	2391.17	19	3.42813		4.61332	6.74255	8.01793	8.37466	8.41431		4.77888	6.50794	7.85797	8.05349	8.1208		4.56867	6.7283	7.84797	8.06005	8.20106			YEYDFERGRRGSKKGSIDVE	40	59	2391.17	19	3.42813		0.165555	-0.23461	-0.159954	-0.321177	-0.293509		-0.044652	-0.014252	-0.169962	-0.314617	-0.213253			YEYDFERGRRGSKKGSIDVE	40
		FERGRRGSKKGSIDVE	44	59	1820.97	15	1.62609		3.67295	5.63389	6.79606	6.98747	7.05443		3.71317	5.61235	6.37124	6.89432	6.98537		3.70817	5.67624	6.77145	7.07299	7.1422			FERGRRGSKKGSIDVE	44	59	1820.97	15	1.62609		0.040225	-0.021541	-0.424818	-0.093147	-0.069063		0.035224	0.042349	-0.024611	0.085519	0.087766			FERGRRGSKKGSIDVE	44
		VEKITCVE	58	65	920.476	7	3.27178		0.041427	0.30155	0.838733	0.973949	1.48897		0.122683	0.396836	0.880628	1.07456	1.62756		0.237479	0.468417	0.965497	1.11998	1.61907			VEKITCVE	58	65	920.476	7	3.27178		0.081256	0.095286	0.041895	0.100616	0.138598		0.196052	0.166867	0.126764	0.146028	0.130101			VEKITCVE	58
		VETVIPEKNPPPERQIPRRGEESSEM	64	89	3004.52	20	3.17758		9.67648	10.8771	11.3431	11.8289	12.3797		9.65839	10.8151	11.1479	11.6486	12.2737		9.5509	10.9034	11.3762	11.7874	12.3358			VETVIPEKNPPPERQIPRRGEESSEM	64	89	3004.52	20	3.17758		-0.018094	-0.06208	-0.195259	-0.180312	-0.105992		-0.125589	0.026297	0.033071	-0.041458	-0.043879			VETVIPEKNPPPERQIPRRGEESSEM	64
		VETVIPEKNPPPERQIPRRGEE	64	85	2570.37	16	2.49629		7.80413	9.09775	9.61181	10.1124	10.5785		7.98463	8.98338	9.38546	9.87207	10.5393		7.86336	9.29374	9.60786	9.91722	10.6444			VETVIPEKNPPPERQIPRRGEE	64	85	2570.37	16	2.49629		0.180503	-0.114374	-0.226346	-0.240327	-0.039246		0.059238	0.195995	-0.003943	-0.195174	0.065883			VETVIPEKNPPPERQIPRRGEE	64
		VETVIPEKNPPPERQIPRRGEESSE	64	88	2873.48	19	2.48546		9.1683	10.4611	10.9408	11.433	11.9528		9.25514	10.4368	10.852	11.2385	11.9949		9.04274	10.5367	10.855	11.267	11.8881			VETVIPEKNPPPERQIPRRGEESSE	64	88	2873.48	19	2.48546		0.086841	-0.024294	-0.088802	-0.194502	0.042085		-0.125556	0.075559	-0.085778	-0.166051	-0.064751			VETVIPEKNPPPERQIPRRGEESSE	64
		TVIPEKNPPPERQIPRRGEE	66	85	2342.26	14	2.25397		7.60762	8.49235	8.70898	9.11835	9.48484		7.79859	8.67481	8.72638	9.24421	9.52201		7.61556	8.54835	8.7876	8.98203	9.49667			TVIPEKNPPPERQIPRRGEE	66	85	2342.26	14	2.25397		0.190979	0.182463	0.017396	0.125858	0.037175		0.007945	0.056006	0.078617	-0.136326	0.011832			TVIPEKNPPPERQIPRRGEE	66
		TVIPEKNPPPERQIPRRGEESSE	66	88	2645.36	17	2.25162		8.89699	9.95218	10.1629	10.5361	11.0148		9.27732	10.0249	10.0414	10.5982	10.9037		8.90143	9.99659	10.1809	10.5386	11.0542			TVIPEKNPPPERQIPRRGEESSE	66	88	2645.36	17	2.25162		0.380328	0.072732	-0.12151	0.062109	-0.111184		0.004438	0.044418	0.018054	0.002455	0.039346			TVIPEKNPPPERQIPRRGEESSE	66
		TVIPEKNPPPERQIPRRGEESSEM	66	89	2776.4	18	2.54299		9.40367	10.3818	10.5788	10.9366	11.2572		9.54512	10.3459	10.4742	10.8861	11.2223		9.40844	10.344	10.5958	10.8643	11.3578			TVIPEKNPPPERQIPRRGEESSEM	66	89	2776.4	18	2.54299		0.141451	-0.035942	-0.104585	-0.050453	-0.03498		0.004778	-0.037813	0.017016	-0.072229	0.100538			TVIPEKNPPPERQIPRRGEESSEM	66
		IERFPYPFQ	95	103	1196.61	6	5.34136		0.783036	1.12206	1.1663	1.16128	1.25951		0.894041	1.1636	1.11846	1.12634	1.24427		0.932929	1.22009	1.23616	1.23437	1.34824			IERFPYPFQ	95	103	1196.61	6	5.34136		0.111005	0.04154	-0.047842	-0.034936	-0.015237		0.149893	0.098033	0.069864	0.073098	0.088733			IERFPYPFQ	95
		VVYDEGPLYVFSPTEE	104	119	1843.86	13	5.94753		2.09447	2.809	4.2219	5.01713	5.21643		2.17532	3.03331	4.28324	4.95633	5.11048		2.14811	3.21727	4.28542	4.88469	5.23761			VVYDEGPLYVFSPTEE	104	119	1843.86	13	5.94753		0.080857	0.224315	0.061349	-0.060803	-0.105951		0.053645	0.408271	0.063519	-0.132443	0.021182			VVYDEGPLYVFSPTEE	104
		VIRYNSDL	131	138	979.521	7	3.71419		3.41769	3.76835	4.33944	4.36608	4.49614		3.51309	3.86184	4.21712	4.35258	4.33866		3.45338	3.8826	4.28531	4.26671	4.50478			VIRYNSDL	131	138	979.521	7	3.71419		0.095397	0.093497	-0.122319	-0.013497	-0.157484		0.03569	0.114254	-0.054129	-0.099373	0.008635			VIRYNSDL	131
		VQKYHPCF	139	146	1021.49	6	3.69542		0.182382	0.375823	0.558362	0.939633	1.61796		0.264947	0.491103	0.633043	1.10855	1.74783		0.303462	0.5472	0.650594	1.06188	1.74139			VQKYHPCF	139	146	1021.49	6	3.69542		0.082565	0.11528	0.074681	0.168913	0.129876		0.12108	0.171377	0.092232	0.122249	0.123431			VQKYHPCF	139
		QKYHPCF	140	146	922.424	5	3.29826		0.176854	0.411935	0.54377	0.954122	1.59702		0.191069	0.441968	0.5911	1.10597	1.72183		0.289868	0.476035	0.662961	1.07726	1.71369			QKYHPCF	140	146	922.424	5	3.29826		0.014215	0.030033	0.04733	0.151845	0.124807		0.113014	0.0641	0.119191	0.123133	0.116665			QKYHPCF	140
		WIDGQYL	147	153	894.436	6	5.41884		0.758684	1.15609	1.39145	2.16316	2.7385		0.796984	1.14176	1.29301	2.12517	2.72285		0.768281	1.16904	1.40333	2.08458	2.73769			WIDGQYL	147	153	894.436	6	5.41884		0.0383	-0.014329	-0.098439	-0.03799	-0.015653		0.009597	0.01295	0.011884	-0.078579	-0.00081			WIDGQYL	147
		LCCSQTAKNAMGCQ	153	166	1457.6	13	3.46418		4.58505	6.27802	7.29565	7.62344	8.00104		4.7533	6.10281	6.92985	7.3683	7.74007		4.63388	6.21193	6.96342	7.33827	7.7397			LCCSQTAKNAMGCQ	153	166	1457.6	13	3.46418		0.168253	-0.175211	-0.365796	-0.255138	-0.260966		0.048833	-0.066088	-0.332234	-0.285171	-0.261345			LCCSQTAKNAMGCQ	153
		CCSQTAKNAMGCQ	154	166	1344.52	12	2.3026		4.34449	5.66161	6.56987	6.99135	7.33568		4.57462	5.80225	6.54542	7.03945	7.38421		4.42297	5.77941	6.55155	7.02429	7.4096			CCSQTAKNAMGCQ	154	166	1344.52	12	2.3026		0.230127	0.140644	-0.02445	0.048099	0.048524		0.078477	0.117799	-0.018319	0.032937	0.073916			CCSQTAKNAMGCQ	154
		SQTAKNAMGC	156	165	1010.44	9	1.98118		4.02219	5.15577	5.74118	5.78996	5.75129		4.41953	5.3415	5.88646	5.87646	5.93108		4.16182	5.34667	5.77999	5.82465	5.93499			SQTAKNAMGC	156	165	1010.44	9	1.98118		0.397337	0.185728	0.145278	0.086499	0.17979		0.139624	0.190905	0.038815	0.034695	0.183707			SQTAKNAMGC	156
		SQTAKNAMGCQ	156	166	1138.5	10	1.814		3.55498	4.61239	5.27953	5.43621	5.80207		3.7663	4.83053	5.32979	5.52329	5.95755		3.64039	4.74952	5.27614	5.45715	5.85383			SQTAKNAMGCQ	156	166	1138.5	10	1.814		0.211328	0.218133	0.05026	0.087079	0.155484		0.085412	0.137124	-0.003394	0.020943	0.051761			SQTAKNAMGCQ	156
		SQTAKNAMGCQIL	156	168	1364.67	12	3.96216		4.32701	5.71819	6.88947	7.13474	7.54699		4.33253	5.68395	6.77984	7.16772	7.61474		4.3305	5.89105	6.82986	7.1308	7.50873			SQTAKNAMGCQIL	156	168	1364.67	12	3.96216		0.005523	-0.03424	-0.109625	0.03298	0.067751		0.003494	0.172856	-0.059612	-0.003943	-0.038255			SQTAKNAMGCQIL	156
		ILENRNGSLKPGSS	167	180	1471.79	12	2.61107		7.65349	7.66463	7.68347	7.6692	7.70672		7.56675	7.62646	7.52083	7.59715	7.5655		7.6021	7.64354	7.64864	7.64153	7.70444			ILENRNGSLKPGSS	167	180	1471.79	12	2.61107		-0.086742	-0.038172	-0.162649	-0.072047	-0.141219		-0.05139	-0.021088	-0.034834	-0.027667	-0.002284			ILENRNGSLKPGSS	167
		DQILKKPLPPEPTAAPISTTEL	195	216	2359.31	16	4.28228		11.8375	11.9398	11.8838	11.9877	11.9003		11.6061	11.6632	11.6935	11.7573	11.6837		11.6876	11.656	11.77	11.6984	11.7815			DQILKKPLPPEPTAAPISTTEL	195	216	2359.31	16	4.28228		-0.231436	-0.276565	-0.190269	-0.230347	-0.216573		-0.149986	-0.283789	-0.113769	-0.28931	-0.118736			DQILKKPLPPEPTAAPISTTEL	195
		DQILKKPLPPEPTAAPIST	195	213	2016.14	13	3.28125		9.72126	9.73895	9.74337	9.85153	9.81361		9.65491	9.74728	9.74191	9.69175	9.73039		9.64282	9.71696	9.75405	9.7606	9.78394			DQILKKPLPPEPTAAPIST	195	213	2016.14	13	3.28125		-0.066353	0.00833	-0.001465	-0.159781	-0.083223		-0.07844	-0.021995	0.01068	-0.090926	-0.029675			DQILKKPLPPEPTAAPIST	195
		DQILKKPLPPEPTAAPISTTE	195	215	2246.23	15	3.30365		10.9557	11.0041	10.9669	11.0919	11.1253		10.8376	10.9538	10.9358	10.9164	10.9805		10.8119	10.912	10.9624	10.9267	11.0366			DQILKKPLPPEPTAAPISTTE	195	215	2246.23	15	3.30365		-0.118114	-0.050219	-0.031186	-0.175495	-0.144799		-0.143854	-0.092065	-0.004543	-0.165132	-0.088689			DQILKKPLPPEPTAAPISTTE	195
		QILKKPLPPEPTAAPIST	196	213	1901.11	12	3.08478		9.01436	9.0005	9.00809	9.08174	9.13129		9.02862	8.97525	9.00317	9.00134	9.06394		8.92581	9.03473	9.01716	9.07223	9.10211			QILKKPLPPEPTAAPIST	196	213	1901.11	12	3.08478		0.014265	-0.025255	-0.004923	-0.080404	-0.067357		-0.088546	0.034227	0.009061	-0.009512	-0.029186			QILKKPLPPEPTAAPIST	196
		QILKKPLPPEPTAAPISTTE	196	215	2131.2	14	3.11517		10.194	10.2503	10.2299	10.3054	10.3444		10.1594	10.2534	10.2673	10.3357	10.2587		10.234	10.1766	10.2701	10.2856	10.2881			QILKKPLPPEPTAAPISTTE	196	215	2131.2	14	3.11517		-0.034609	0.003063	0.037361	0.030226	-0.085647		0.039991	-0.073731	0.04017	-0.019826	-0.056257			QILKKPLPPEPTAAPISTTE	196
		ILKKPLPPEPTAAPIST	197	213	1773.05	11	2.92685		7.92911	7.93479	7.93306	8.04922	7.95571		8.06638	8.05156	8.00096	8.0048	7.96635		7.95281	7.92677	8.05079	8.08667	8.05523			ILKKPLPPEPTAAPIST	197	213	1773.05	11	2.92685		0.137274	0.116764	0.067909	-0.044418	0.01064		0.0237	-0.008021	0.117731	0.037449	0.099518			ILKKPLPPEPTAAPIST	197
		TELKKVVAL	214	222	1000.64	8	3.47449		1.05951	1.85432	2.51335	3.61939	5.04441		1.174	2.01083	2.62232	3.89126	5.2496		1.00917	1.89961	2.37063	3.23854	4.49014			TELKKVVAL	214	222	1000.64	8	3.47449		0.114484	0.156513	0.10897	0.271873	0.205192		-0.050341	0.045291	-0.142717	-0.380845	-0.554275			TELKKVVAL	214
		LKKVVAL	216	222	770.55	6	2.52307		0.07401	0.334006	0.789205	1.65952	2.96834		0.14466	0.405526	0.862918	1.93644	3.13052		0.151738	0.393371	0.706035	1.41603	2.61226			LKKVVAL	216	222	770.55	6	2.52307		0.07065	0.07152	0.073713	0.276914	0.162185		0.077728	0.059365	-0.08317	-0.243488	-0.356071			LKKVVAL	216
		YDYMPMNAND	223	232	1233.46	8	4.3896		2.85293	3.62076	3.93481	4.42015	4.7347		2.94888	3.56686	3.82739	4.38118	4.71406		2.62501	3.55075	3.8388	4.21261	4.60424			YDYMPMNAND	223	232	1233.46	8	4.3896		0.095949	-0.053905	-0.10742	-0.038967	-0.020635		-0.227913	-0.070011	-0.096014	-0.207537	-0.130459			YDYMPMNAND	223
		YDYMPMNA	223	230	1004.39	6	4.3162		2.20166	2.92568	3.08795	3.28471	3.6015		2.32655	2.94933	3.05994	3.3575	3.60245		2.05306	2.9093	3.08745	3.17025	3.46763			YDYMPMNA	223	230	1004.39	6	4.3162		0.124889	0.023649	-0.028013	0.07279	0.00095		-0.1486	-0.016378	-0.000503	-0.114464	-0.133869			YDYMPMNA	223
		LQLRKGEEYF	233	242	1282.68	9	4.16021		0.067806	0.112617	1.04481	2.66695	4.6002		0.117562	0.224608	1.10796	3.05605	4.71217		0.190602	0.219164	0.903992	2.28176	4.03287			LQLRKGEEYF	233	242	1282.68	9	4.16021		0.049756	0.111991	0.063151	0.389093	0.111972		0.122796	0.106547	-0.140814	-0.385191	-0.567332			LQLRKGEEYF	233
		LQLRKGEE	233	240	972.547	7	1.86963		0.261643	0.292585	1.22621	2.81286	4.20288		0.304705	0.42567	1.2033	2.89556	4.11176		0.378404	0.436461	1.15377	2.44436	3.86104			LQLRKGEE	233	240	972.547	7	1.86963		0.043062	0.133085	-0.022913	0.082698	-0.091117		0.116761	0.143876	-0.072444	-0.368501	-0.34184			LQLRKGEE	233
		LQLRKGEEY	233	241	1135.61	8	2.657		0.238899	0.347817	1.1849	2.57967	3.99956		0.253586	0.362565	1.24862	2.77057	3.97985		0.272757	0.374188	1.04526	2.29903	3.53703			LQLRKGEEY	233	241	1135.61	8	2.657		0.014687	0.014748	0.063714	0.190903	-0.01971		0.033858	0.026371	-0.13964	-0.280632	-0.46253			LQLRKGEEY	233
		QLRKGEEY	234	241	1022.53	7	2.65722		0.196931	0.242075	1.01545	2.48374	4.10002		0.344283	0.129993	1.24746	2.94189	4.09201		0.208354	0.271961	0.878436	2.1236	3.54826			QLRKGEEY	234	241	1022.53	7	2.65722		0.147352	-0.112082	0.232014	0.458144	-0.008013		0.011423	0.029886	-0.137012	-0.360148	-0.551767			QLRKGEEY	234
		RKGEEYF	236	242	928.452	6	3.0615		0.127434	0.187429	0.736257	1.59668	2.57463		0.211551	0.296819	0.781116	1.61269	2.41006		0.129416	0.155744	0.680016	1.3812	2.22855			RKGEEYF	236	242	928.452	6	3.0615		0.084117	0.10939	0.044859	0.016016	-0.164563		0.001982	-0.031685	-0.056241	-0.215478	-0.346078			RKGEEYF	236
		ILEESNLPWWRARDKNGQEGYIPSN	243	267	2972.46	22	4.81069		3.74035	5.12768	7.42816	10.587	12.4301		3.82076	5.10578	7.54121	10.5181	12.2818		3.68298	5.12815	7.12397	9.75515	11.7963			ILEESNLPWWRARDKNGQEGYIPSN	243	267	2972.46	22	4.81069		0.080407	-0.021902	0.113059	-0.068838	-0.148322		-0.057369	0.000466	-0.304186	-0.83183	-0.633828			ILEESNLPWWRARDKNGQEGYIPSN	243
		ILEESNLPWWRARDKNGQEGYIPSNY	243	268	3135.53	23	5.04349		3.40669	4.7104	7.21421	10.6406	12.6519		3.45673	4.59199	7.18581	10.6116	12.4141		3.39966	4.72075	6.86941	9.68589	11.9665			ILEESNLPWWRARDKNGQEGYIPSNY	243	268	3135.53	23	5.04349		0.050036	-0.118406	-0.028397	-0.029011	-0.237872		-0.007037	0.010351	-0.344795	-0.954675	-0.685448			ILEESNLPWWRARDKNGQEGYIPSNY	243
		EESNLPWWRARDKNGQEGYIPSN	245	267	2746.3	20	4.51001		2.81765	4.07319	6.23006	9.07939	11.0296		2.915	4.06834	6.25865	9.25507	10.8746		2.75755	4.11337	5.95695	8.27272	10.4142			EESNLPWWRARDKNGQEGYIPSN	245	267	2746.3	20	4.51001		0.097349	-0.004857	0.028598	0.175684	-0.155011		-0.060103	0.040178	-0.273103	-0.806668	-0.615342			EESNLPWWRARDKNGQEGYIPSN	245
		EESNLPWWRARDKNGQEGYIPSNY	245	268	2909.36	21	4.80071		2.76175	4.02333	6.26715	9.56475	11.6712		2.83405	3.94279	6.18196	9.58435	11.5558		2.66088	4.04226	5.87999	8.61496	10.9645			EESNLPWWRARDKNGQEGYIPSNY	245	268	2909.36	21	4.80071		0.072297	-0.080538	-0.085196	0.019596	-0.115445		-0.100871	0.018931	-0.38716	-0.949794	-0.706697			EESNLPWWRARDKNGQEGYIPSNY	245
		ESNLPWWRARDKNGQEGYIPSNY	246	268	2780.32	20	4.77829		2.25627	3.47102	5.68959	9.12836	11.127		2.27019	3.47075	5.63633	9.18696	10.9764		2.17192	3.50086	5.32477	8.11546	10.3836			ESNLPWWRARDKNGQEGYIPSNY	246	268	2780.32	20	4.77829		0.013916	-0.000265	-0.053263	0.058598	-0.15054		-0.084357	0.029844	-0.364814	-1.0129	-0.743402			ESNLPWWRARDKNGQEGYIPSNY	246
		AEDSIEM	272	278	794.324	6	3.87612		2.25065	2.76398	3.19214	3.20887	3.20134		2.41541	2.88455	3.18373	3.22614	3.2612		2.25291	2.82993	3.22819	3.24517	3.27643			AEDSIEM	272	278	794.324	6	3.87612		0.164766	0.120569	-0.008405	0.01727	0.059862		0.002262	0.065952	0.036056	0.036307	0.075085			AEDSIEM	272
		YEWYSKHMTRSQAEQL	279	294	2056.95	15	4.04424		2.46083	3.37084	4.86342	6.47049	7.81015		2.563	3.4037	4.84979	6.4546	7.76325		2.4845	3.43874	4.81685	6.0338	7.40484			YEWYSKHMTRSQAEQL	279	294	2056.95	15	4.04424		0.102164	0.032857	-0.013623	-0.015888	-0.046903		0.02367	0.067902	-0.046565	-0.436685	-0.405307			YEWYSKHMTRSQAEQL	279
		WYSKHMTRSQAEQL	281	294	1764.85	13	3.39046		2.79553	3.55184	4.02557	5.42034	6.75411		2.96121	3.67877	4.22822	5.64964	6.9092		2.91409	3.65872	4.22786	5.07181	6.41112			WYSKHMTRSQAEQL	281	294	1764.85	13	3.39046		0.165674	0.126927	0.202646	0.229297	0.155093		0.11856	0.106881	0.20229	-0.348529	-0.34299			WYSKHMTRSQAEQL	281
		YSKHMTRSQAEQL	282	294	1578.77	12	2.6798		2.7619	3.40057	3.68354	4.87402	6.36724		2.87186	3.47909	3.76202	5.14864	6.44327		2.80306	3.50507	3.83818	4.67063	6.00052			YSKHMTRSQAEQL	282	294	1578.77	12	2.6798		0.109965	0.078525	0.078482	0.274614	0.076039		0.041161	0.104504	0.154647	-0.203389	-0.366711			YSKHMTRSQAEQL	282
		LLKQEGKEGGF	294	304	1205.65	10	2.67407		1.49029	2.14747	3.5475	4.89117	5.69566		1.64509	2.21081	3.49893	4.91995	5.56911		1.74522	2.45693	3.64723	4.69524	5.54504			LLKQEGKEGGF	294	304	1205.65	10	2.67407		0.154798	0.063334	-0.04857	0.028781	-0.126553		0.254924	0.309454	0.099735	-0.195929	-0.15062			LLKQEGKEGGF	294
		LKQEGKEGGF	295	304	1092.57	9	2.63692		1.30114	1.84498	3.27799	4.33822	4.79522		1.4894	2.10145	3.40639	4.39008	4.75486		1.58681	2.22471	3.36269	4.21558	4.79065			LKQEGKEGGF	295	304	1092.57	9	2.63692		0.188253	0.256467	0.128409	0.051863	-0.040357		0.285669	0.37973	0.084706	-0.122642	-0.004571			LKQEGKEGGF	295
		IVRDSSKAGKYTVSV	305	319	1609.89	14	3.10193		3.88545	4.45817	5.10951	6.75022	8.28905		3.86327	4.43898	5.11244	6.93312	8.18477		3.90335	4.57786	5.0535	6.21996	7.86493			IVRDSSKAGKYTVSV	305	319	1609.89	14	3.10193		-0.022178	-0.019189	0.002931	0.182898	-0.104284		0.017906	0.119687	-0.056003	-0.53026	-0.42412			IVRDSSKAGKYTVSV	305
		FAKSTGEPQGVIRH	320	333	1526.81	12	2.52985		5.25936	6.05983	6.87294	7.1862	7.51245		5.28	6.20746	6.81856	7.1351	7.47526		5.23831	6.37021	6.83125	7.01728	7.40023			FAKSTGEPQGVIRH	320	333	1526.81	12	2.52985		0.020638	0.147628	-0.054388	-0.051098	-0.037191		-0.021047	0.310375	-0.041697	-0.16892	-0.11222			FAKSTGEPQGVIRH	320
		FAKSTGEPQGVIRHYVV	320	336	1888.01	15	3.83109		5.2613	6.14804	7.05573	7.83581	8.80509		4.83967	6.24497	6.94212	7.84269	8.61055		5.17332	6.40545	7.03289	7.62246	8.41567			FAKSTGEPQGVIRHYVV	320	336	1888.01	15	3.83109		-0.421628	0.096925	-0.113612	0.006882	-0.194541		-0.087977	0.257403	-0.022844	-0.21335	-0.389417			FAKSTGEPQGVIRHYVV	320
		FAKSTGEPQGVIRHYVVC	320	337	1991.02	16	4.00974		5.22483	6.24714	7.14574	8.37377	9.49995		5.022	6.19772	7.11971	8.40708	9.32423		5.15715	6.30683	7.09052	8.03814	9.11583			FAKSTGEPQGVIRHYVVC	320	337	1991.02	16	4.00974		-0.202837	-0.049418	-0.026037	0.033305	-0.175717		-0.06768	0.059691	-0.055229	-0.335632	-0.384118			FAKSTGEPQGVIRHYVVC	320
		FAKSTGEPQGVIRHYVVCSTPQSQY	320	344	2782.36	22	3.90591		6.76168	8.6227	10.6793	12.5392	13.8384		6.66343	8.61621	10.5966	12.3708	13.651		6.81288	8.72695	10.6029	12.1015	13.4626			FAKSTGEPQGVIRHYVVCSTPQSQY	320	344	2782.36	22	3.90591		-0.098241	-0.006495	-0.08275	-0.168391	-0.18732		0.051202	0.104251	-0.076436	-0.437692	-0.375795			FAKSTGEPQGVIRHYVVCSTPQSQY	320
		AKSTGEPQGVIRHYVVCSTPQSQ	321	343	2472.23	20	3.41779		6.26171	8.03008	9.77745	11.2397	12.3247		6.19618	7.95987	9.61995	11.15	12.3692		6.20703	7.93734	9.57254	10.7898	11.9797			AKSTGEPQGVIRHYVVCSTPQSQ	321	343	2472.23	20	3.41779		-0.065526	-0.070213	-0.1575	-0.089691	0.044482		-0.054674	-0.092742	-0.204907	-0.449859	-0.344939			AKSTGEPQGVIRHYVVCSTPQSQ	321
		AKSTGEPQGVIRHYVVCSTPQSQY	321	344	2635.29	21	3.75883		6.21352	7.93861	9.88706	11.8568	13.1169		6.12018	7.94031	9.87841	11.8509	12.9747		6.18649	8.14311	9.82833	11.3693	12.7084			AKSTGEPQGVIRHYVVCSTPQSQY	321	344	2635.29	21	3.75883		-0.093343	0.001705	-0.008648	-0.005904	-0.142146		-0.027036	0.204506	-0.058729	-0.487513	-0.408458			AKSTGEPQGVIRHYVVCSTPQSQY	321
		YVVCSTPQSQY	334	344	1274.57	9	3.8944		1.6252	2.34768	3.53428	4.89015	5.48552		1.56401	2.20293	3.64136	4.8857	5.45893		1.7436	2.50071	3.56228	4.60522	5.31832			YVVCSTPQSQY	334	344	1274.57	9	3.8944		-0.061185	-0.144752	0.10708	-0.004446	-0.02659		0.118399	0.153028	0.028001	-0.284922	-0.167205			YVVCSTPQSQY	334
		YYLAEKHLFSTIPEL	344	358	1823.96	13	5.50982		2.25696	3.45928	5.01574	6.31259	6.83339		2.23388	3.43803	4.90514	6.09469	6.68252		2.36903	3.63023	5.09998	6.12897	6.70403			YYLAEKHLFSTIPEL	344	358	1823.96	13	5.50982		-0.023079	-0.021243	-0.110596	-0.217892	-0.150865		0.112071	0.170955	0.084237	-0.183621	-0.129362			YYLAEKHLFSTIPEL	344
		YLAEKHL	345	351	873.483	6	2.34725		2.04698	2.92327	3.13493	3.11728	3.1005		2.19873	3.13701	3.07256	3.08176	3.10434		2.13413	2.95226	3.12374	3.11035	3.22047			YLAEKHL	345	351	873.483	6	2.34725		0.151747	0.213747	-0.062372	-0.035525	0.003843		0.08714	0.02899	-0.011194	-0.006932	0.119973			YLAEKHL	345
		YLAEKHLFSTIPEL	345	358	1660.89	12	4.99615		2.01665	3.03314	4.29977	5.26386	5.78356		2.0784	3.1377	4.23961	5.14968	5.74758		2.16028	3.23396	4.40064	5.07662	5.64224			YLAEKHLFSTIPEL	345	358	1660.89	12	4.99615		0.061745	0.104562	-0.060161	-0.11418	-0.035985		0.143623	0.200821	0.100878	-0.187239	-0.141321			YLAEKHLFSTIPEL	345
		LAEKHLFSTIPEL	346	358	1497.83	11	4.77654		1.85369	2.57048	3.9193	4.77806	5.28761		1.83858	2.74567	3.84684	4.75957	5.22657		1.87542	2.67778	3.82182	4.5122	5.02527			LAEKHLFSTIPEL	346	358	1497.83	11	4.77654		-0.015107	0.175193	-0.072469	-0.018481	-0.06104		0.021733	0.107299	-0.09748	-0.265858	-0.262347			LAEKHLFSTIPEL	346
		LAEKHLFSTIPELINYHQHNSAG	346	368	2619.33	21	3.60737		6.80391	8.77285	10.6524	12.3386	13.3766		6.9455	8.8265	10.626	12.1273	13.1442		6.95962	8.70614	10.6057	11.8676	12.9773			LAEKHLFSTIPELINYHQHNSAG	346	368	2619.33	21	3.60737		0.141585	0.05365	-0.026342	-0.211275	-0.23248		0.155709	-0.066705	-0.046628	-0.470982	-0.399366			LAEKHLFSTIPELINYHQHNSAG	346
		TIPELINYHQHNSAGLISRLKY	354	375	2567.37	20	4.26356		3.12777	4.05753	5.97058	8.17484	9.42691		2.9874	3.86985	5.72549	7.81419	8.97319		3.17835	3.92518	5.8556	7.93095	9.24827			TIPELINYHQHNSAGLISRLKY	354	375	2567.37	20	4.26356		-0.140372	-0.187677	-0.245082	-0.360654	-0.453717		0.050579	-0.132352	-0.114981	-0.243894	-0.178637			TIPELINYHQHNSAGLISRLKY	354
		INYHQHNSAGL	359	369	1253.6	10	2.91496		2.52123	2.58493	2.90564	3.55342	3.76996		2.55077	2.66697	2.88428	3.53587	3.80049		2.57709	2.65598	2.88695	3.43985	3.78704			INYHQHNSAGL	359	369	1253.6	10	2.91496		0.029546	0.082046	-0.021358	-0.01755	0.030524		0.05586	0.07106	-0.018685	-0.11357	0.017079			INYHQHNSAGL	359
		NYHQHNSAGL	360	369	1140.52	9	2.91681		2.51412	2.53987	2.8514	3.49403	3.77954		2.50335	2.60709	2.89696	3.4828	3.75068		2.57477	2.62247	2.84175	3.35969	3.77243			NYHQHNSAGL	360	369	1140.52	9	2.91681		-0.010772	0.067224	0.045564	-0.011232	-0.028858		0.060645	0.082603	-0.009648	-0.13434	-0.007112			NYHQHNSAGL	360
		HQHNSAGL	362	369	863.412	7	1.79185		2.80624	2.7952	2.79068	2.90624	2.85136		2.8361	2.87683	2.72783	2.77931	2.86176		2.75548	2.89016	2.7933	2.83426	2.80598			HQHNSAGL	362	369	863.412	7	1.79185		0.029853	0.081623	-0.062853	-0.126925	0.010408		-0.050767	0.094959	0.002613	-0.071981	-0.045378			HQHNSAGL	362
		ISRLKYPVSKQNKNAPSTAGLGYGSW	370	395	2822.49	23	4.16418		11.3359	11.7912	13.2098	14.8416	14.8789		10.9904	11.6793	13.1326	14.5198	14.4916		11.116	11.7641	13.0735	14.7163	14.7937			ISRLKYPVSKQNKNAPSTAGLGYGSW	370	395	2822.49	23	4.16418		-0.345472	-0.111915	-0.077118	-0.321755	-0.387286		-0.219843	-0.02709	-0.136306	-0.125254	-0.085268			ISRLKYPVSKQNKNAPSTAGLGYGSW	370
		ISRLKYPVSKQNKNAPSTAGL	370	390	2272.28	18	2.74489		8.1829	8.68888	10.2	11.7698	11.7504		8.14494	8.68015	10.1984	11.6661	11.6808		8.11875	8.79561	10.0133	11.6216	11.7699			ISRLKYPVSKQNKNAPSTAGL	370	390	2272.28	18	2.74489		-0.037954	-0.008723	-0.001617	-0.103654	-0.069609		-0.064151	0.106734	-0.186761	-0.148114	0.019464			ISRLKYPVSKQNKNAPSTAGL	370
		ISRLKYPVSKQNKNAPSTAGLG	370	391	2329.3	19	2.59167		9.14009	9.61757	11.0689	12.6286	12.758		9.01432	9.59544	11.1404	12.576	12.6278		8.9747	9.65098	10.8753	12.3599	12.5562			ISRLKYPVSKQNKNAPSTAGLG	370	391	2329.3	19	2.59167		-0.125767	-0.022122	0.071462	-0.052542	-0.130226		-0.165388	0.033414	-0.193674	-0.26868	-0.201867			ISRLKYPVSKQNKNAPSTAGLG	370
		EIDPKDLTF	396	404	1077.55	7	4.87757		1.93847	2.24779	3.14759	3.7691	4.17811		2.34622	2.92104	3.76574	4.22215	4.29307		2.03706	2.23059	2.96527	3.63017	4.07158			EIDPKDLTF	396	404	1077.55	7	4.87757		0.407748	0.673248	0.618152	0.453051	0.114953		0.098592	-0.017205	-0.182312	-0.138928	-0.106528			EIDPKDLTF	396
		EIDPKDLTFL	396	405	1190.63	8	5.53737		1.56938	2.17401	3.16343	3.77379	4.1301		2.22376	3.00331	3.71445	4.30562	4.41925		1.75251	2.33142	3.14227	3.79511	4.20702			EIDPKDLTFL	396	405	1190.63	8	5.53737		0.654379	0.829306	0.551019	0.531831	0.289154		0.183129	0.157414	-0.021163	0.021314	0.076918			EIDPKDLTFL	396
		FLKELGTGQF	404	413	1139.61	9	4.69247		4.70641	5.44531	5.68554	5.80494	5.78547		4.78948	5.56823	5.67531	5.71573	5.65962		4.66871	5.44509	5.75193	5.77675	5.82688			FLKELGTGQF	404	413	1139.61	9	4.69247		0.083076	0.12292	-0.010233	-0.089208	-0.125847		-0.037697	-0.000219	0.066384	-0.028195	0.041412			FLKELGTGQF	404
		LKELGTGQF	405	413	992.541	8	3.65818		4.49301	4.99169	5.19446	5.21767	5.20936		4.84797	5.1117	5.18475	5.19573	5.14778		4.48312	5.03547	5.17515	5.23178	5.25413			LKELGTGQF	405	413	992.541	8	3.65818		0.35496	0.120009	-0.009705	-0.021936	-0.061582		-0.009887	0.043776	-0.019308	0.014112	0.044773			LKELGTGQF	405
		LKELGTGQFGVVKYGKWRGQY	405	425	2414.3	20	4.0405		5.37573	7.1157	9.69304	11.5571	12.1015		6.49151	9.01825	11.292	11.934	12.0276		5.57467	6.99073	9.03148	10.8809	11.8345			LKELGTGQFGVVKYGKWRGQY	405	425	2414.3	20	4.0405		1.11578	1.90255	1.59898	0.376867	-0.073879		0.198946	-0.124976	-0.661564	-0.676247	-0.266959			LKELGTGQFGVVKYGKWRGQY	405
		KELGTGQF	406	413	879.457	7	3.10336		3.46778	3.81557	4.04588	4.07342	4.08779		3.7683	3.99458	4.06755	4.1041	4.19928		3.46411	3.95102	4.08727	4.05126	4.12758			KELGTGQF	406	413	879.457	7	3.10336		0.300524	0.179004	0.021669	0.030676	0.111492		-0.00367	0.135445	0.041385	-0.022165	0.039789			KELGTGQF	406
		GVVKYGKWRGQYDVA	414	428	1725.91	14	3.71803		1.57736	2.47051	4.8404	6.78542	7.46569		2.42323	4.20447	7.05735	7.63241	8.07945		1.68876	2.46379	4.13433	6.18208	7.15286			GVVKYGKWRGQYDVA	414	428	1725.91	14	3.71803		0.845869	1.73396	2.21695	0.846997	0.613761		0.111391	-0.006722	-0.70607	-0.60334	-0.312832			GVVKYGKWRGQYDVA	414
		GVVKYGKWRGQY	414	425	1440.77	11	3.25527		1.44108	2.29496	4.80342	6.91996	7.60188		2.34096	4.37656	7.14831	7.64341	7.64957		1.55648	2.37888	4.16835	6.26956	7.40221			GVVKYGKWRGQY	414	425	1440.77	11	3.25527		0.899879	2.08159	2.3449	0.723449	0.047698		0.1154	0.083914	-0.63507	-0.650393	-0.199662			GVVKYGKWRGQY	414
		VKYGKWRGQY	416	425	1284.68	9	3.61974		1.18418	1.8682	3.65139	5.18152	5.82521		1.89347	3.38629	5.27998	5.80782	5.91625		1.20235	1.86224	3.14557	4.66122	5.53333			VKYGKWRGQY	416	425	1284.68	9	3.61974		0.709283	1.51809	1.62859	0.626297	0.091046		0.018166	-0.00596	-0.50582	-0.520304	-0.291876			VKYGKWRGQY	416
		IREGSMSEDEF	432	442	1299.55	10	4.05979		3.23081	4.14366	4.44891	4.82188	4.81998		3.79232	4.21568	4.66592	4.81097	4.9018		3.39933	4.2238	4.57549	4.71155	4.84926			IREGSMSEDEF	432	442	1299.55	10	4.05979		0.561509	0.07202	0.217015	-0.010906	0.081827		0.168515	0.080133	0.126581	-0.110324	0.029281			IREGSMSEDEF	432
		IREGSMSE	432	439	908.414	7	1.99575		3.41754	4.14118	4.19733	4.18816	4.22984		4.00308	4.1956	4.1108	4.16196	4.20565		3.5636	4.25893	4.15155	4.15643	4.1889			IREGSMSE	432	439	908.414	7	1.99575		0.585542	0.054423	-0.086533	-0.026199	-0.024186		0.146063	0.11775	-0.045781	-0.031734	-0.040943			IREGSMSE	432
		IREGSMSEDE	432	441	1152.48	9	2.20167		3.75292	4.60969	4.62877	4.66421	4.67809		4.33317	4.80155	4.71878	4.72683	4.779		3.9242	4.72908	4.69384	4.68961	4.74957			IREGSMSEDE	432	441	1152.48	9	2.20167		0.580248	0.191857	0.090013	0.062617	0.10091		0.171271	0.119383	0.065072	0.025398	0.071476			IREGSMSEDE	432
		IEEAKVMMNLSHEKL	443	457	1771.91	14	4.47691		1.6524	2.71049	4.56867	6.31868	7.49639		1.92621	2.96997	5.28148	6.81151	7.61506		1.82247	3.09193	4.93887	6.34659	7.45704			IEEAKVMMNLSHEKL	443	457	1771.91	14	4.47691		0.273812	0.259482	0.712809	0.492825	0.118672		0.170072	0.38144	0.370206	0.027908	-0.039348			IEEAKVMMNLSHEKL	443
		AKVMMNLSHEKL	446	457	1400.74	11	3.26972		0.892023	1.7033	2.97256	4.01387	4.82619		1.18538	1.97068	3.38198	4.37371	5.02614		1.07718	2.08108	3.17713	4.05299	4.74546			AKVMMNLSHEKL	446	457	1400.74	11	3.26972		0.293359	0.267377	0.40942	0.35984	0.199947		0.185154	0.377778	0.204575	0.039123	-0.080731			AKVMMNLSHEKL	446
		KVMMNLSHEKL	447	457	1329.7	10	3.15827		0.947472	1.55543	2.3007	3.41084	4.22928		1.16335	1.67239	2.58462	3.57781	4.28613		0.989366	1.63774	2.3896	3.22989	4.07904			KVMMNLSHEKL	447	457	1329.7	10	3.15827		0.215873	0.116964	0.283925	0.166966	0.056847		0.041894	0.082315	0.088897	-0.180953	-0.150239			KVMMNLSHEKL	447
		NLSHEKL	451	457	840.457	6	3.08465		0.72628	1.01181	1.15802	1.33027	1.69464		0.901784	1.09879	1.14258	1.41867	1.7797		0.844453	1.13643	1.17805	1.36088	1.68697			NLSHEKL	451	457	840.457	6	3.08465		0.175504	0.086983	-0.015438	0.088405	0.085058		0.118173	0.124623	0.020033	0.030611	-0.007674			NLSHEKL	451
		YGVCTKQRPIF	461	471	1311.69	9	3.74959		1.69236	1.99183	2.3805	2.72268	3.319		1.75525	2.21201	2.45785	3.17338	3.75444		1.84916	2.22496	2.47788	2.78754	3.42313			YGVCTKQRPIF	461	471	1311.69	9	3.74959		0.062887	0.220176	0.077347	0.450693	0.435436		0.156798	0.23313	0.097382	0.064854	0.104131			YGVCTKQRPIF	461
		GVCTKQRPIF	462	471	1148.62	8	4.10956		1.55455	1.79917	2.13431	2.43046	2.89903		1.6037	1.98787	2.27124	2.82144	3.36165		1.68691	2.02611	2.23568	2.50999	3.03755			GVCTKQRPIF	462	471	1148.62	8	4.10956		0.049152	0.188692	0.136934	0.390976	0.462624		0.132359	0.226937	0.101372	0.079525	0.138522			GVCTKQRPIF	462
		TKQRPIF	465	471	889.525	5	3.35501		0.918154	1.13367	1.38656	1.46929	1.76773		1.01015	1.26057	1.47597	1.75113	2.20441		0.934348	1.29657	1.39607	1.47021	1.7809			TKQRPIF	465	471	889.525	5	3.35501		0.091992	0.126897	0.089405	0.281834	0.436677		0.016194	0.162896	0.009508	0.000915	0.013176			TKQRPIF	465
		YMANGCL	476	482	771.316	6	4.24434		1.45592	1.92854	2.52449	2.54917	2.50191		1.62465	2.05182	2.47833	2.53967	2.61816		1.17603	1.69164	2.27778	2.51901	2.59986			YMANGCL	476	482	771.316	6	4.24434		0.168732	0.123273	-0.046156	-0.009504	0.116244		-0.279885	-0.2369	-0.246704	-0.030162	0.097943			YMANGCL	476
		LNYLREMRHRFQTQQL	483	498	2133.11	15	4.34625		4.80256	5.72693	6.83564	7.09226	7.37984		4.79526	5.59856	6.7675	6.79948	7.06258		4.80165	5.58606	6.85115	6.89185	7.21346			LNYLREMRHRFQTQQL	483	498	2133.11	15	4.34625		-0.007307	-0.12837	-0.068136	-0.292784	-0.317259		-0.000917	-0.140874	0.015514	-0.200413	-0.166378			LNYLREMRHRFQTQQL	483
		LREMRHRFQTQQL	486	498	1742.92	12	3.08443		4.28902	5.14914	5.98105	6.1333	6.01579		4.425	5.17916	5.84327	5.89837	5.95477		4.31202	5.29176	5.85914	5.81111	5.96128			LREMRHRFQTQQL	486	498	1742.92	12	3.08443		0.135983	0.030019	-0.137779	-0.234931	-0.061028		0.023008	0.142621	-0.12191	-0.322193	-0.054513			LREMRHRFQTQQL	486
		MRHRFQTQQL	489	498	1344.7	9	2.90072		2.80374	3.50996	4.01683	4.02978	4.00046		2.80608	3.49363	3.97227	4.07116	3.93369		2.86234	3.53253	4.04089	3.95726	4.02547			MRHRFQTQQL	489	498	1344.7	9	2.90072		0.002339	-0.016333	-0.044553	0.041374	-0.066767		0.058597	0.022566	0.024061	-0.072521	0.02501			MRHRFQTQQL	489
		CKDVCEAM	502	509	898.347	7	3.41541		0.059243	0.031965	0.084974	0.020912	0.019791		0.132433	0.115993	0.048434	0.156973	0.107255		0.097108	0.094977	0.149018	0.147453	0.146467			CKDVCEAM	502	509	898.347	7	3.41541		0.07319	0.084028	-0.03654	0.136061	0.087464		0.037865	0.063012	0.064044	0.126541	0.126676			CKDVCEAM	502
		MEYLESKQFL	509	518	1287.63	9	5.00205		0.139714	0.420697	1.49009	2.63986	3.24908		0.24743	0.724896	1.69889	3.33857	3.55436		0.184051	0.642274	1.48888	2.37475	2.90075			MEYLESKQFL	509	518	1287.63	9	5.00205		0.107716	0.304199	0.2088	0.698706	0.305284		0.044337	0.221577	-0.00121	-0.265119	-0.348334			MEYLESKQFL	509
		EYLESKQFL	510	518	1156.59	8	4.34687		0.153196	0.43487	1.43567	2.49125	3.13942		0.18346	0.669098	1.78492	2.97011	3.48776		0.240614	0.526121	1.43366	2.34377	2.85441			EYLESKQFL	510	518	1156.59	8	4.34687		0.030264	0.234228	0.349243	0.478853	0.348343		0.087418	0.091251	-0.002012	-0.147477	-0.285			EYLESKQFL	510
		YLESKQFL	511	518	1027.55	7	4.15041		0.136821	0.419844	1.38233	2.41286	2.95571		0.201692	0.60779	1.69222	2.72051	3.11821		0.243603	0.534245	1.34671	2.20751	2.67278			YLESKQFL	511	518	1027.55	7	4.15041		0.064871	0.187946	0.309892	0.307649	0.162507		0.106782	0.114401	-0.03562	-0.205345	-0.282925			YLESKQFL	511
		YLESKQFLHRDLAARNCL	511	528	2177.13	17	4.06312		0.334858	0.75852	2.43456	3.88778	4.67538		0.46331	1.19594	2.95527	4.38186	5.10018									YLESKQFLHRDLAARNCL	511	528	2177.13	17	4.06312		0.128452	0.437424	0.520711	0.494087	0.424802									YLESKQFLHRDLAARNCL	511
		ESKQFLHRDLAARNCL	513	528	1900.98	15	3.59799		0.48525	0.914189	2.39058	3.62544	4.26268		0.526583	1.34061	2.95013	4.03493	4.72993									ESKQFLHRDLAARNCL	513	528	1900.98	15	3.59799		0.041333	0.426421	0.559552	0.40949	0.467256									ESKQFLHRDLAARNCL	513
		LHRDLAARNC	518	527	1168.6	9	2.37484		0.281672	0.390436	1.09542	1.6259	1.85465		0.385115	0.589321	1.26101	1.82198	2.21126									LHRDLAARNC	518	527	1168.6	9	2.37484		0.103443	0.198885	0.165591	0.196077	0.356605									LHRDLAARNC	518
		RNCLVNDQGVVKVSDF	525	540	1792.9	15	4.5345		1.46217	2.27853	2.89616	3.26642	3.78953		1.48812	2.50279	2.91207	3.43045	3.84699									RNCLVNDQGVVKVSDF	525	540	1792.9	15	4.5345		0.025953	0.224262	0.015913	0.164032	0.057461									RNCLVNDQGVVKVSDF	525
		RNCLVNDQGVVKVSDFGL	525	542	1963.01	17	4.85025		1.38969	2.53624	4.14422	4.61732	5.04481		2.04614	3.56432	4.35302	4.66385	5.06895									RNCLVNDQGVVKVSDFGL	525	542	1963.01	17	4.85025		0.656453	1.02808	0.2088	0.046529	0.024134									RNCLVNDQGVVKVSDFGL	525
		CLVNDQGVVKVSDF	527	540	1522.76	13	4.80129		1.46634	2.32099	2.97587	3.26817	3.82366		1.57035	2.48521	3.04171	3.42972	3.72772									CLVNDQGVVKVSDF	527	540	1522.76	13	4.80129		0.104011	0.164221	0.065844	0.161552	-0.09594									CLVNDQGVVKVSDF	527
		CLVNDQGVVKVSD	527	539	1375.69	12	3.36087		1.61772	2.42385	2.58008	2.80101	3.26111		1.70512	2.31398	2.36544	2.88362	3.31557									CLVNDQGVVKVSD	527	539	1375.69	12	3.36087		0.087393	-0.109876	-0.214638	0.082616	0.054463									CLVNDQGVVKVSD	527
		VNDQGVVKVSDF	529	540	1306.66	11	4.30265		1.18768	1.92252	2.48019	2.86171	3.22609		1.32699	2.15958	2.5951	2.97431	3.24646		1.11959	1.93481	2.32062	2.58626	2.835			VNDQGVVKVSDF	529	540	1306.66	11	4.30265		0.139307	0.237062	0.114908	0.112593	0.020368		-0.068091	0.012285	-0.159573	-0.275456	-0.391093			VNDQGVVKVSDF	529
		VNDQGVVKVSDFGLSR	529	544	1719.9	15	4.28898		2.25225	4.04079	5.72753	6.24298	6.63041		3.10229	5.15407	6.01574	6.28375	6.62459		2.28024	4.25624	5.52927	5.93759	6.17372			VNDQGVVKVSDFGLSR	529	544	1719.9	15	4.28898		0.850033	1.11328	0.28821	0.040767	-0.00582		0.027984	0.215449	-0.198258	-0.305397	-0.456695			VNDQGVVKVSDFGLSR	529
		VNDQGVVKVSDFGLSRY	529	545	1882.97	16	4.71269		2.12102	4.0169	6.2859	6.74986	7.04544		3.24544	5.52169	6.53758	6.77919	7.10307		2.3078	4.18734	6.20207	6.65878	6.78369			VNDQGVVKVSDFGLSRY	529	545	1882.97	16	4.71269		1.12442	1.50479	0.251678	0.029324	0.057627		0.186778	0.170445	-0.083829	-0.091078	-0.261748			VNDQGVVKVSDFGLSRY	529
		VNDQGVVKVSDFGLSRYVL	529	547	2095.12	18	5.49519		2.26113	4.81415	7.68224	8.24706	8.47821		3.78692	6.5578	7.92085	8.10827	8.47537		2.52362	4.97676	7.47527	8.05108	8.1567			VNDQGVVKVSDFGLSRYVL	529	547	2095.12	18	5.49519		1.52579	1.74366	0.238616	-0.138792	-0.002838		0.262493	0.162615	-0.206973	-0.195977	-0.321508			VNDQGVVKVSDFGLSRYVL	529
		VNDQGVVKVSDFGLSRYVLDD	529	549	2325.17	20	5.31938		2.96158	5.43798	8.39446	8.91571	9.16631		4.4139	7.34934	8.586	8.91335	9.20114		3.11786	5.66646	8.10177	8.74204	8.91772			VNDQGVVKVSDFGLSRYVLDD	529	549	2325.17	20	5.31938		1.45232	1.91136	0.191535	-0.002361	0.034833		0.15628	0.228486	-0.292686	-0.173669	-0.248589			VNDQGVVKVSDFGLSRYVLDD	529
		VNDQGVVKVSD	529	539	1159.6	10	2.40409		1.27159	2.00412	2.19137	2.43502	2.81508		1.40428	2.08243	2.26344	2.59675	2.88407		1.30443	2.16833	2.21471	2.26058	2.47968			VNDQGVVKVSD	529	539	1159.6	10	2.40409		0.132691	0.078304	0.072071	0.16173	0.068987		0.032837	0.164213	0.023344	-0.174441	-0.335399			VNDQGVVKVSD	529
		VNDQGVVKVSDFGL	529	542	1476.77	13	4.79574		1.1368	2.27476	3.61288	4.09032	4.43959		2.00276	3.35013	4.0393	4.44521	4.74357		1.13042	2.30692	3.46715	3.80362	4.07685			VNDQGVVKVSDFGL	529	542	1476.77	13	4.79574		0.865962	1.07537	0.426413	0.354882	0.303981		-0.006378	0.032158	-0.145736	-0.286708	-0.362734			VNDQGVVKVSDFGL	529
		VNDQGVVKVSDFGLSRYVLDDE	529	550	2454.21	21	5.07486		3.21903	5.74887	8.72841	9.27594	9.50994		4.6259	7.58967	8.93444	9.16354	9.33759		3.20064	5.83333	8.30484	8.78128	9.00477			VNDQGVVKVSDFGLSRYVLDDE	529	550	2454.21	21	5.07486		1.40688	1.8408	0.206029	-0.112394	-0.172349		-0.01839	0.084458	-0.423574	-0.494655	-0.50517			VNDQGVVKVSDFGLSRYVLDDE	529
		FGLSRYVL	540	547	954.541	7	5.25		1.04117	2.41513	4.01278	4.13429	4.13071		1.98884	3.47636	3.98958	4.02761	4.09645		1.22638	2.51397	3.8397	4.02872	4.09537			FGLSRYVL	540	547	954.541	7	5.25		0.947673	1.06124	-0.023197	-0.10668	-0.034259		0.185214	0.098843	-0.173071	-0.105567	-0.035338			FGLSRYVL	540
		FGLSRYVLDD	540	549	1184.59	9	4.94377		1.82116	3.32944	4.98279	5.1392	5.14635		2.87876	4.48159	5.05928	5.0944	5.11073		2.03695	3.45656	4.96709	5.08643	5.11457			FGLSRYVLDD	540	549	1184.59	9	4.94377		1.0576	1.15215	0.076491	-0.044793	-0.035619		0.215785	0.127115	-0.015703	-0.05277	-0.031777			FGLSRYVLDD	540
		FGLSRYVLDDE	540	550	1313.64	10	4.65322		2.15544	3.68465	5.4384	5.53615	5.49584		3.17801	4.76843	5.32734	5.4364	5.39912		2.38273	3.81002	5.30772	5.43802	5.51123			FGLSRYVLDDE	540	550	1313.64	10	4.65322		1.02258	1.08379	-0.111058	-0.099748	-0.096722		0.227293	0.12538	-0.130674	-0.098136	0.015394			FGLSRYVLDDE	540
		GLSRYVL	541	547	807.472	6	4.09191		1.1762	2.48077	3.73469	3.84183	3.77616		2.09706	3.4305	3.74987	3.76196	3.81131		1.33482	2.58865	3.59789	3.77202	3.7842			GLSRYVL	541	547	807.472	6	4.09191		0.920862	0.949731	0.015181	-0.079871	0.03515		0.158619	0.107886	-0.136799	-0.069809	0.008042			GLSRYVL	541
		GLSRYVLDDE	541	550	1166.57	9	3.84589		2.3985	3.81842	5.10393	5.20939	5.21803		3.30749	4.6947	5.11373	5.16446	5.12296		2.55689	3.87667	4.94353	5.09425	5.17662			GLSRYVLDDE	541	550	1166.57	9	3.84589		0.908991	0.876274	0.009802	-0.044928	-0.095076		0.158394	0.058248	-0.160396	-0.115145	-0.041409			GLSRYVLDDE	541
		GLSRYVLDD	541	549	1037.53	8	3.78842		1.83737	3.20099	4.55738	4.63939	4.65988		3.03016	4.32365	4.62748	4.72464	4.75499									GLSRYVLDD	541	549	1037.53	8	3.78842		1.19279	1.12266	0.070102	0.085247	0.095115									GLSRYVLDD	541
		SRYVLDD	543	549	867.421	6	2.95234		1.27774	2.18125	3.37433	3.42591	3.48116		2.12722	3.28739	3.57587	3.46298	3.48486		1.37477	2.36201	3.22874	3.3012	3.34269			SRYVLDD	543	549	867.421	6	2.95234		0.849479	1.10615	0.201546	0.037073	0.003707		0.097023	0.180762	-0.14559	-0.124703	-0.138464			SRYVLDD	543
		SRYVLDDE	543	550	996.463	7	3.08581		1.54703	2.4659	3.55337	3.63445	3.62208		2.4326	3.49518	3.853	3.77166	3.81747		1.66811	2.6545	3.5219	3.61385	3.71411			SRYVLDDE	543	550	996.463	7	3.08581		0.885569	1.02927	0.299626	0.137204	0.195392		0.121085	0.188594	-0.031477	-0.020603	0.092031			SRYVLDDE	543
		EYTSSVGSKF	550	559	1104.52	9	3.65111		4.72458	4.92165	4.98961	4.93475	4.93692		4.80348	4.90774	4.76608	4.77526	4.86489		4.67006	4.93004	4.9748	4.93081	4.98308			EYTSSVGSKF	550	559	1104.52	9	3.65111		0.078903	-0.013906	-0.223525	-0.159485	-0.072021		-0.054521	0.008386	-0.014806	-0.003936	0.04616			EYTSSVGSKF	550
		EYTSSVGSKFPVRWSPPEVL	550	569	2265.16	16	5.22855		4.97982	5.41301	6.79674	8.66856	9.35488		5.07808	5.58155	7.32895	8.68583	9.14464		5.0683	5.5157	6.52102	8.01595	9.2429			EYTSSVGSKFPVRWSPPEVL	550	569	2265.16	16	5.22855		0.098257	0.168535	0.532217	0.017269	-0.210239		0.088486	0.102686	-0.275714	-0.652611	-0.111979			EYTSSVGSKFPVRWSPPEVL	550
		EYTSSVGSKFPVRWSPPEVLM	550	570	2396.2	17	5.22068		5.25252	6.00647	7.63611	9.69353	10.4008		5.32374	6.12783	8.13641	9.70006	10.0408		5.29033	6.08619	7.36868	8.97059	10.2975			EYTSSVGSKFPVRWSPPEVLM	550	570	2396.2	17	5.22068		0.071216	0.121357	0.500305	0.006525	-0.359954		0.037816	0.079715	-0.267427	-0.722937	-0.103229			EYTSSVGSKFPVRWSPPEVLM	550
		YTSSVGSKFPVRWSPPEVLM	551	570	2267.15	16	5.42935		4.31679	5.088	6.76298	8.73202	9.40514		4.44001	5.28997	7.24933	8.90275	9.27896		4.42764	5.13817	6.50218	8.05073	9.35573			YTSSVGSKFPVRWSPPEVLM	551	570	2267.15	16	5.42935		0.123215	0.201969	0.486354	0.170738	-0.126186		0.110852	0.050169	-0.260795	-0.681281	-0.049412			YTSSVGSKFPVRWSPPEVLM	551
		YTSSVGSKFPVRWSPPEVL	551	569	2136.11	15	4.909		4.67319	5.17943	6.45595	8.33744	9.03984		4.73618	5.20228	6.75706	8.36386	8.95271		4.63702	5.13905	6.05885	7.68302	8.81426			YTSSVGSKFPVRWSPPEVL	551	569	2136.11	15	4.909		0.062985	0.022853	0.301117	0.026417	-0.087132		-0.036168	-0.040384	-0.397093	-0.654419	-0.225585			YTSSVGSKFPVRWSPPEVL	551
		PVRWSPPEVL	560	569	1179.65	6	5.02692		0.540704	0.789887	1.87999	3.70341	4.39514		0.641796	0.979535	2.33764	3.95737	4.33694		0.601217	0.772656	1.64158	3.08585	4.36138			PVRWSPPEVL	560	569	1179.65	6	5.02692		0.101092	0.189648	0.457653	0.253964	-0.058194		0.060513	-0.017231	-0.238407	-0.617556	-0.033758			PVRWSPPEVL	560
		MYSKFSSKSDIWA	570	582	1549.74	12	4.43615		0.9595	1.73513	2.63763	2.84983	2.95043		1.17046	2.14849	2.79741	2.91634	3.06957		1.14944	1.99528	2.77258	2.98299	3.05068			MYSKFSSKSDIWA	570	582	1549.74	12	4.43615		0.210957	0.413357	0.159775	0.066506	0.119141		0.189939	0.26015	0.134947	0.133163	0.100248			MYSKFSSKSDIWA	570
		MYSKFSSKSDIWAF	570	583	1696.8	13	5.14769		0.984635	1.74603	2.67861	2.91486	2.91102		1.1213	1.96123	2.65798	2.79665	2.97643		1.07469	1.86551	2.63604	2.97192	2.98469			MYSKFSSKSDIWAF	570	583	1696.8	13	5.14769		0.136662	0.215199	-0.020628	-0.118217	0.065411		0.090056	0.119484	-0.042573	0.057052	0.073676			MYSKFSSKSDIWAF	570
		YSKFSSKSDIWA	571	582	1418.7	11	3.86002		0.869728	1.5359	2.49063	2.74896	2.78335		1.11489	1.88529	2.59587	2.75523	2.92911		0.950777	1.73621	2.4759	2.61771	2.7346			YSKFSSKSDIWA	571	582	1418.7	11	3.86002		0.245162	0.349384	0.105241	0.006267	0.145758		0.081049	0.200307	-0.014728	-0.131252	-0.048757			YSKFSSKSDIWA	571
		YSKFSSKSDIWAF	571	583	1565.76	12	5.01929		0.803625	1.50903	2.37375	2.62978	2.64901		0.973276	1.70218	2.30795	2.47635	2.60899		0.866005	1.57725	2.3591	2.53307	2.58575			YSKFSSKSDIWAF	571	583	1565.76	12	5.01929		0.169651	0.193154	-0.065794	-0.153424	-0.040018		0.06238	0.068217	-0.014644	-0.096711	-0.063258			YSKFSSKSDIWAF	571
		SSKSDIWA	575	582	893.436	7	3.52775		0.346338	0.45527	0.957353	1.1773	1.26689		0.25657	0.439929	0.900613	1.09196	1.19714		0.383156	0.495312	0.898019	1.20518	1.23772			SSKSDIWA	575	582	893.436	7	3.52775		-0.089768	-0.015341	-0.05674	-0.085346	-0.069749		0.036818	0.040042	-0.059334	0.027879	-0.029163			SSKSDIWA	575
		SSKSDIWAF	575	583	1040.5	8	5.15489		0.25259	0.399898	0.7755	0.956791	0.995362		0.280384	0.401015	0.795713	0.918822	1.01813		0.324896	0.37821	0.782056	0.962083	1.01664			SSKSDIWAF	575	583	1040.5	8	5.15489		0.027794	0.001117	0.020213	-0.037969	0.022765		0.072306	-0.021688	0.006556	0.005292	0.021282			SSKSDIWAF	575
		MWEIYSL	587	593	941.444	6	6.37904		0.017151	0.004825	0.046518	0.148682	0.421156		0.020892	0.022218	0.066596	0.175279	0.47132		0.085154	0.020282	0.048694	0.127174	0.335265			MWEIYSL	587	593	941.444	6	6.37904		0.003741	0.017393	0.020078	0.026597	0.050164		0.068003	0.015457	0.002176	-0.021508	-0.085891			MWEIYSL	587
		MWEIYSLGKMPYERF	587	601	1949.93	13	5.96737		1.4621	2.74591	3.94756	4.85009	5.60085		1.67665	3.22511	3.82124	4.84688	5.52544		1.38184	2.88853	3.65925	4.2117	5.13843			MWEIYSLGKMPYERF	587	601	1949.93	13	5.96737		0.214553	0.479196	-0.126325	-0.003217	-0.075412		-0.080261	0.142622	-0.288308	-0.638398	-0.462421			MWEIYSLGKMPYERF	587
		MWEIYSLGKMPYERFTNSE	587	605	2381.09	17	5.75924		2.57845	4.66826	5.99242	6.87823	7.7024		2.86494	5.04678	5.90039	6.77527	7.61069		2.68036	4.80711	5.87755	6.33617	7.2964			MWEIYSLGKMPYERFTNSE	587	605	2381.09	17	5.75924		0.286482	0.378526	-0.092036	-0.102968	-0.091717		0.10191	0.138856	-0.114871	-0.542062	-0.406004			MWEIYSLGKMPYERFTNSE	587
		WEIYSLGKMPYERF	588	601	1818.89	12	5.72137		1.27477	2.48504	3.64918	4.60765	5.37092		1.52109	2.9285	3.65877	4.6153	5.39609		1.43679	2.75337	3.50364	4.09645	5.00418			WEIYSLGKMPYERF	588	601	1818.89	12	5.72137		0.246321	0.443459	0.00959	0.007649	0.025166		0.16202	0.26833	-0.145545	-0.511204	-0.366747			WEIYSLGKMPYERF	588
		WEIYSLGKMPYERFTNSE	588	605	2250.05	16	5.51805		2.58771	4.49761	5.90892	6.79902	7.62931		2.84465	4.9796	6.00154	6.85084	7.52659		2.69606	4.74504	5.79713	6.37274	7.26431			WEIYSLGKMPYERFTNSE	588	605	2250.05	16	5.51805		0.256941	0.481986	0.092618	0.051819	-0.102721		0.108357	0.247423	-0.11179	-0.426277	-0.365003			WEIYSLGKMPYERFTNSE	588
		WEIYSLGKMPYERFTNSETAE	588	608	2551.18	19	5.47724		2.73222	4.99259	7.75473	8.76831	9.57231		3.03769	5.71097	7.93945	8.74011	9.43299		2.69645	5.05725	7.34572	8.23686	9.19003			WEIYSLGKMPYERFTNSETAE	588	608	2551.18	19	5.47724		0.305463	0.718381	0.184725	-0.028201	-0.139324		-0.035768	0.064661	-0.409007	-0.53145	-0.382281			WEIYSLGKMPYERFTNSETAE	588
		WEIYSLGKM	588	596	1126.56	8	5.2833		0.512248	0.787924	1.23798	2.28019	2.92602		0.499378	0.925712	1.17935	2.21816	2.90036		0.367383	0.837096	1.01796	1.50071	2.39226			WEIYSLGKM	588	596	1126.56	8	5.2833		-0.01287	0.137788	-0.058632	-0.062033	-0.02566		-0.144865	0.049172	-0.220022	-0.77948	-0.533762			WEIYSLGKM	588
		WEIYSLGKMPYE	588	599	1515.72	10	5.44559		0.715338	1.87328	2.52402	3.40616	4.20265		0.952878	2.24935	2.5547	3.54305	4.30034		0.7186	2.00985	2.35476	2.84579	3.7505			WEIYSLGKMPYE	588	599	1515.72	10	5.44559		0.23754	0.376065	0.03068	0.136883	0.097691		0.003262	0.136565	-0.169263	-0.560374	-0.45214			WEIYSLGKMPYE	588
		WEIYSLGKMPYERFTNS	588	604	2121.01	15	5.27854		2.68837	4.3566	5.7039	6.59223	7.40505		2.74037	4.59075	5.60635	6.4311	7.20886		2.59005	4.50468	5.37387	5.95839	6.98056			WEIYSLGKMPYERFTNS	588	604	2121.01	15	5.27854		0.051999	0.23415	-0.097556	-0.161132	-0.196189		-0.098322	0.148078	-0.33003	-0.63384	-0.424489			WEIYSLGKMPYERFTNS	588
		GKMPYERFTNSETAE	594	608	1759.8	13	3.79798		2.77434	4.97604	7.5594	7.79379	7.77003		2.9895	5.873	7.62836	7.77814	7.85222		2.57092	5.16091	7.23346	7.73939	7.85013			GKMPYERFTNSETAE	594	608	1759.8	13	3.79798		0.215155	0.896957	0.068955	-0.015656	0.082189		-0.203417	0.184869	-0.325945	-0.054401	0.080099			GKMPYERFTNSETAE	594
		GKMPYERF	594	601	1027.5	6	3.46214		1.4607	2.87598	3.7899	3.78657	3.77226		1.6007	3.03455	3.51863	3.8274	3.69158		1.45858	2.92691	3.70063	3.72242	3.8188			GKMPYERF	594	601	1027.5	6	3.46214		0.139994	0.158573	-0.271276	0.040824	-0.080679		-0.002123	0.050931	-0.089271	-0.064154	0.046549			GKMPYERF	594
		GKMPYERFTNSE	594	605	1458.67	10	3.41839		2.70664	4.91653	5.90649	5.95291	5.96743		2.99016	5.27919	5.89309	5.94902	5.93439		2.60252	4.83554	5.80697	5.95163	5.96237			GKMPYERFTNSE	594	605	1458.67	10	3.41839		0.283517	0.362663	-0.013408	-0.003887	-0.033041		-0.104125	-0.080996	-0.099526	-0.001279	-0.005059			GKMPYERFTNSE	594
		TAEHIAQGLRLPRPHL	606	621	1809.02	13	4.0558		3.08261	4.01408	6.27968	7.17452	7.53033		3.22983	4.40881	6.41836	6.9769	7.44763		2.95247	3.95639	5.75221	6.90401	7.39625			TAEHIAQGLRLPRPHL	606	621	1809.02	13	4.0558		0.147218	0.394729	0.138678	-0.197618	-0.082696		-0.13014	-0.057687	-0.527471	-0.270506	-0.134077			TAEHIAQGLRLPRPHL	606
		TAEHIAQGLRLPRPHLAS	606	623	1967.09	15	3.83453		3.3129	4.23504	6.53761	7.52687	8.17995		3.49497	4.61434	6.75818	7.55963	8.23694		3.23605	4.16737	6.03479	7.30385	8.10107			TAEHIAQGLRLPRPHLAS	606	623	1967.09	15	3.83453		0.182069	0.379303	0.220569	0.032763	0.056985		-0.076846	-0.06767	-0.502818	-0.223021	-0.078889			TAEHIAQGLRLPRPHLAS	606
		TAEHIAQGLRLPRPHLASE	606	624	2096.14	16	3.52722		3.69238	4.73596	7.01427	8.03723	8.65362		4.01479	5.13875	7.2522	8.0257	8.63704		3.65093	4.55629	6.5308	7.85451	8.57293			TAEHIAQGLRLPRPHLASE	606	624	2096.14	16	3.52722		0.322408	0.402789	0.237934	-0.011531	-0.016574		-0.041455	-0.17967	-0.483468	-0.182717	-0.080685			TAEHIAQGLRLPRPHLASE	606
		AEHIAQGLRLPRPHLAS	607	623	1866.05	14	3.36882		3.31783	4.20201	5.93348	6.81675	7.4658		3.51812	4.55933	6.04495	6.82128	7.37022		3.35893	4.13111	5.59767	6.67264	7.37903			AEHIAQGLRLPRPHLAS	607	623	1866.05	14	3.36882		0.200291	0.357323	0.111478	0.004532	-0.095579		0.041098	-0.070895	-0.335807	-0.144106	-0.086776			AEHIAQGLRLPRPHLAS	607
		HIAQGLRLPRPHL	609	621	1507.9	10	3.82616		3.02316	3.67288	5.05375	5.47837	5.83994		2.97379	3.67117	4.93788	5.26454	5.66328		2.85578	3.57214	4.6302	5.19691	5.59584			HIAQGLRLPRPHL	609	621	1507.9	10	3.82616		-0.049367	-0.001715	-0.115866	-0.213825	-0.17666		-0.167374	-0.100744	-0.423544	-0.281453	-0.244103			HIAQGLRLPRPHL	609
		HIAQGLRLPRPHLAS	609	623	1665.97	12	3.58063		3.13077	3.77338	5.2216	5.95996	6.55707		3.26697	3.99701	5.05713	5.66183	6.25382		3.12129	3.79835	5.08815	5.75364	6.49304			HIAQGLRLPRPHLAS	609	623	1665.97	12	3.58063		0.1362	0.223622	-0.164469	-0.298132	-0.303248		-0.009481	0.024969	-0.133457	-0.206322	-0.064031			HIAQGLRLPRPHLAS	609
		HIAQGLRLPRPHLASE	609	624	1795.01	13	3.61602		3.78345	4.44632	5.77856	6.44049	7.1596		3.86511	4.60425	5.87927	6.44526	7.07739		3.74033	4.41346	5.65549	6.3931	7.02824			HIAQGLRLPRPHLASE	609	624	1795.01	13	3.61602		0.081657	0.157929	0.100708	0.004772	-0.082208		-0.043117	-0.032869	-0.123067	-0.047391	-0.13136			HIAQGLRLPRPHLASE	609
		LRLPRPHLAS	614	623	1159.71	7	3.43938		2.17446	2.21691	2.30573	2.60622	3.27308		2.11211	2.15577	2.16975	2.6278	3.37029		2.16894	2.21498	2.28157	2.58527	3.27789			LRLPRPHLAS	614	623	1159.71	7	3.43938		-0.062346	-0.061139	-0.135985	0.02158	0.097218		-0.005519	-0.001924	-0.024168	-0.020956	0.004812			LRLPRPHLAS	614
		ERVYTIM	624	630	911.466	6	4.17623		0.016495	0.115212	0.684845	1.14452	1.6279		0.061287	0.165414	0.781023	1.29486	1.80052		0.170148	0.222787	0.797872	1.2592	1.77452			ERVYTIM	624	630	911.466	6	4.17623		0.044792	0.050202	0.096178	0.150339	0.172614		0.153653	0.107575	0.113027	0.11468	0.146619			ERVYTIM	624
		YSCWHEKADERPSF	631	644	1754.76	12	3.96698		1.4797	2.14264	2.91188	3.72645	4.1327		1.65473	2.34328	2.93974	3.76096	4.18391		1.56295	2.34183	2.89354	3.69539	4.17986			YSCWHEKADERPSF	631	644	1754.76	12	3.96698		0.175028	0.200639	0.027866	0.034515	0.051212		0.083243	0.199192	-0.01834	-0.031053	0.047166			YSCWHEKADERPSF	631
		SCWHEKADERPSF	632	644	1591.7	11	3.61693		1.33052	1.94767	2.6549	3.42762	3.84682		1.47109	2.09428	2.5516	3.48102	3.84396		1.38195	2.1455	2.71483	3.4205	3.89248			SCWHEKADERPSF	632	644	1591.7	11	3.61693		0.140571	0.14661	-0.103295	0.053398	-0.002857		0.051424	0.197831	0.059927	-0.007114	0.045657			SCWHEKADERPSF	632
		WHEKADERPSF	634	644	1401.65	9	2.95647		1.50372	2.22386	2.98464	3.84238	4.27996		1.42967	2.32038	2.87587	3.62984	4.14269		1.49577	2.4008	3.00467	3.567	4.16174			WHEKADERPSF	634	644	1401.65	9	2.95647		-0.074047	0.09652	-0.108774	-0.212545	-0.137263		-0.007948	0.176932	0.020029	-0.275378	-0.118211			WHEKADERPSF	634
		HEKADERPSF	635	644	1215.58	8	2.28623		1.21898	1.78689	2.4717	3.24662	3.71316		1.34084	1.96037	2.48735	3.28653	3.68881		1.29403	1.89658	2.48712	3.16913	3.6939			HEKADERPSF	635	644	1215.58	8	2.28623		0.121862	0.173481	0.015657	0.039914	-0.024352		0.075046	0.10969	0.015422	-0.077491	-0.019267			HEKADERPSF	635
		KILLSNILDV	645	654	1127.7	9	5.76777		0.039008	0.011788	0.135234	0.466453	1.42802		0.028376	0.023876	0.061858	0.523532	1.59833		0.143676	0.057386	0.189915	0.513943	1.4344			KILLSNILDV	645	654	1127.7	9	5.76777		-0.010632	0.012088	-0.073376	0.057079	0.170316		0.104668	0.045598	0.054681	0.04749	0.00639			KILLSNILDV	645
		KILLSNIL	645	652	913.608	7	5.06317		-0.012246	-0.028835	0.017861	0.14327	0.5046		0.01298	0.0021	0.04181	0.152825	0.575269		0.081068	0.05126	0.098407	0.216753	0.624966			KILLSNIL	645	652	913.608	7	5.06317		0.025226	0.030935	0.023949	0.009555	0.070669		0.093314	0.080095	0.080546	0.073483	0.120366			KILLSNIL	645
		DVMDEESHHHHHH	653	665	1646.65	12	2.09014		2.09077	2.43042	2.64505	2.63237	2.71203		2.11472	2.54876	2.63056	2.72795	2.79352		2.15083	2.58486	2.65152	2.64331	2.77623			DVMDEESHHHHHH	653	665	1646.65	12	2.09014		0.023951	0.118336	-0.014492	0.095578	0.081487		0.060063	0.154438	0.006469	0.010933	0.064203			DVMDEESHHHHHH	653
		MDEESHHHHHH	655	665	1432.56	10	1.32277		1.55142	1.78878	1.93798	1.91465	1.97127		1.61892	1.85088	1.94646	2.02145	2.08203		1.6124	1.93278	2.00703	1.98565	2.08309			MDEESHHHHHH	655	665	1432.56	10	1.32277		0.067503	0.062101	0.008484	0.106801	0.11077		0.060987	0.144007	0.06905	0.070999	0.111823			MDEESHHHHHH	655
		DEESHHHHHH	656	665	1301.52	9	1.32583		1.36366	1.50177	1.64402	1.64654	1.66667		1.35961	1.57545	1.65933	1.64113	1.80528		1.36027	1.62401	1.76997	1.68457	1.80384			DEESHHHHHH	656	665	1301.52	9	1.32583		-0.004054	0.073678	0.015318	-0.005408	0.138611		-0.003397	0.122236	0.125959	0.038032	0.13717			DEESHHHHHH	656
		*Puprple = Data in Figure 6 panel h																										*Red = Peptides containing L528																				*Red = Peptides containing L528
		*Red = Peptides containing L528
[truncated: 46 more columns]

## Sheet: Figure 8
					T474I BTK																																T474I BTK
					Relative Deuterium Incorporation: ALL DATA																																Relative Difference Deuterium Incorporation: ALL DATA (T474I BTK:Inhibitor - T474I BTK)
												T474I BTK						T474I BTK:Zanubrutinib						T474I BTK:Tirabrutinib						T474I BTK:Pirtobrutinib														T474I BTK:Zanubrutinib
					Sequence	Start	End	MHP	MaxUptake	RT		10 sec	1 min	10 min	1 hour	4 hours		10 sec	1 min	10 min	1 hour	4 hours		10 sec	1 min	10 min	1 hour	4 hours		10 sec	1 min	10 min	1 hour	4 hours			Sequence	Start	End	MHP	MaxUptake	RT		10 sec	1 min	10 min	1 hour	4 hours
					AAVILES	2	8	702.403	6	3.06231		1.4389	2.29798	3.26412	3.76007	3.99363		1.40494	2.36571	3.22164	3.82204	4.02028		1.46118	2.25014	3.25726	3.75647	4.04565		1.42241	2.29665	3.24223	3.85332	3.93294			AAVILES	2	8	702.403	6	3.06231		-0.033961	0.067728	-0.042473	0.061967	0.026656
					IFLKRSQQKKKTSPLNF	9	25	2063.21	15	2.96787		6.15615	6.3785	6.31632	6.26389	6.33673		5.84406	5.97773	6.04561	6.17147	6.29577		5.95563	6.1263	6.13041	6.16729	6.26915		5.89946	6.03566	5.9869	6.0469	6.20007			IFLKRSQQKKKTSPLNF	9	25	2063.21	15	2.96787		-0.312097	-0.40077	-0.27071	-0.092428	-0.040959
					LKRSQQKKKTSPLNF	11	25	1803.06	13	2.33528		6.45522	6.49772	6.40201	6.45899	6.4512		6.23707	6.37344	6.31905	6.39994	6.42136		6.31795	6.44938	6.23069	6.47563	6.30257		6.34077	6.39608	6.38543	6.40996	6.44777			LKRSQQKKKTSPLNF	11	25	1803.06	13	2.33528		-0.218149	-0.124285	-0.082956	-0.059051	-0.029833
					LTVHKLSY	32	39	960.551	7	2.98212		0.459763	0.917929	1.28203	1.38033	1.53827		0.474245	0.894055	1.31044	1.45842	1.57387		0.444704	0.833829	1.30643	1.45962	1.60001		0.447364	0.918152	1.34535	1.43885	1.60281			LTVHKLSY	32	39	960.551	7	2.98212		0.014482	-0.023874	0.028408	0.078088	0.0356
					LTVHKLSYYE	32	41	1252.66	9	3.62886		0.480228	1.1948	2.02008	2.5484	2.83143		0.462898	1.29653	2.01084	2.50905	2.77104		0.445891	1.18369	2.1722	2.76509	2.90724		0.510137	1.07787	2.12814	2.47245	2.83211			LTVHKLSYYE	32	41	1252.66	9	3.62886		-0.01733	0.101728	-0.009247	-0.039352	-0.060385
					TVHKLSY	33	39	847.467	6	2.9817		0.427523	0.847434	1.24343	1.28379	1.42933		0.365922	0.816037	1.1957	1.28756	1.45291		0.404321	0.73494	1.17227	1.23692	1.39566		0.383234	0.789851	1.19095	1.25811	1.42674			TVHKLSY	33	39	847.467	6	2.9817		-0.061601	-0.031397	-0.047721	0.003766	0.023583
					YEYDFERGRRGSKKGSIDVE	40	59	2391.17	19	3.00601		4.77888	6.50794	7.85797	8.05349	8.1208		4.74482	6.80286	7.76293	8.04856	8.27465		4.34532	6.675	7.72366	7.89857	8.03555		4.49796	6.94282	7.62464	7.73829	8.13888			YEYDFERGRRGSKKGSIDVE	40	59	2391.17	19	3.00601		-0.034058	0.294925	-0.095044	-0.004923	0.153849
					FERGRRGSKKGSIDVE	44	59	1820.97	15	1.6114		3.71317	5.61235	6.37124	6.89432	6.98537		3.57443	5.53549	6.59372	6.76423	6.7453		3.57726	5.62688	6.53788	6.95528	6.88361		3.55429	5.39547	6.50058	6.67073	6.77159			FERGRRGSKKGSIDVE	44	59	1820.97	15	1.6114		-0.138744	-0.076863	0.222482	-0.130097	-0.240066
					VEKITCVE	58	65	920.476	7	2.81262		0.122683	0.396836	0.880628	1.07456	1.62756		0.107312	0.35333	0.846916	1.02152	1.56283		0.09914	0.387624	0.84011	1.05627	1.55987		0.099836	0.370335	0.889715	1.06701	1.64889			VEKITCVE	58	65	920.476	7	2.81262		-0.015371	-0.043506	-0.033712	-0.053041	-0.064738
					VETVIPEKNPPPERQIPRRGEE	64	85	2570.37	16	2.47935		7.98463	8.98338	9.38546	9.87207	10.5393		7.76245	9.08867	9.26638	9.89454	10.51		7.84064	8.71991	9.13458	9.9107	10.5888		7.87507	9.00397	9.24231	9.76894	10.496			VETVIPEKNPPPERQIPRRGEE	64	85	2570.37	16	2.47935		-0.222176	0.105294	-0.119082	0.022472	-0.029286
					VETVIPEKNPPPERQIPRRGEESSE	64	88	2873.48	19	2.4717		9.25514	10.4368	10.852	11.2385	11.9949		9.03169	10.2644	10.7127	11.3266	11.8216		9.04057	10.4721	10.6956	11.2459	11.8572		9.03431	10.3495	10.5672	11.1638	11.757			VETVIPEKNPPPERQIPRRGEESSE	64	88	2873.48	19	2.4717		-0.223453	-0.172404	-0.139313	0.088092	-0.173341
					VETVIPEKNPPPERQIPRRGEESSEM	64	89	3004.52	20	2.75774		9.65839	10.8151	11.1479	11.6486	12.2737		9.52873	10.6094	10.9913	11.8882	12.1874		9.57676	10.6385	11.0964	11.6799	12.3699		9.24536	10.5995	10.9396	11.4728	12.2143			VETVIPEKNPPPERQIPRRGEESSEM	64	89	3004.52	20	2.75774		-0.129659	-0.205667	-0.156537	0.2396	-0.086321
					TVIPEKNPPPERQIPRRGEE	66	85	2342.26	14	2.24218		7.79859	8.67481	8.72638	9.24421	9.52201		7.54125	8.48155	8.70664	9.07053	9.45872		7.73596	8.65367	8.63114	9.20691	9.54968		7.92525	8.51993	8.52185	9.05893	9.40805			TVIPEKNPPPERQIPRRGEE	66	85	2342.26	14	2.24218		-0.257346	-0.193266	-0.019742	-0.173678	-0.063294
					TVIPEKNPPPERQIPRRGEESSE	66	88	2645.36	17	2.23936		9.27732	10.0249	10.0414	10.5982	10.9037		8.9412	9.77163	9.83476	10.6402	10.9498		8.9538	9.94675	10.0922	10.6221	10.885		9.04501	9.8801	9.97005	10.4886	10.9479			TVIPEKNPPPERQIPRRGEESSE	66	88	2645.36	17	2.23936		-0.336115	-0.253277	-0.206597	0.041944	0.046151
					TVIPEKNPPPERQIPRRGEESSEM	66	89	2776.4	18	2.52948		9.54512	10.3459	10.4742	10.8861	11.2223		9.27075	10.2068	10.2322	10.9095	11.2322		9.32106	10.3624	10.2624	10.7927	11.238		9.36318	10.1843	10.2203	10.6574	11.1611			TVIPEKNPPPERQIPRRGEESSEM	66	89	2776.4	18	2.52948		-0.274364	-0.139115	-0.242014	0.023405	0.009929
					IERFPYPFQ	95	103	1196.61	6	4.87487		0.894041	1.1636	1.11846	1.12634	1.24427		0.826253	1.10032	1.1435	1.09377	1.22552		0.881275	1.06461	1.16966	1.20755	1.25552		0.780456	1.07249	1.15262	1.11763	1.18401			IERFPYPFQ	95	103	1196.61	6	4.87487		-0.067788	-0.063278	0.025039	-0.03257	-0.018754
					VVYDEGPLYVFSPTEE	104	119	1843.86	13	5.69206		2.17532	3.03331	4.28324	4.95633	5.11048		1.99196	2.93855	3.9918	4.71175	5.07061		1.95151	2.93771	3.9953	4.98318	5.34683		2.16103	3.10294	4.28821	4.78135	5.12496			VVYDEGPLYVFSPTEE	104	119	1843.86	13	5.69206		-0.183361	-0.094757	-0.291441	-0.24458	-0.039869
					VIRYNSDL	131	138	979.521	7	3.30036		3.51309	3.86184	4.21712	4.35258	4.33866		3.41887	3.67378	4.26934	4.22011	4.33485		3.39094	4.04927	4.24224	4.35309	4.32332		3.55316	3.86944	4.26844	4.24918	4.23722			VIRYNSDL	131	138	979.521	7	3.30036		-0.09422	-0.188061	0.052217	-0.132475	-0.003812
					VQKYHPCF	139	146	1021.49	6	3.27982		0.264947	0.491103	0.633043	1.10855	1.74783		0.258898	0.483298	0.64576	1.17498	1.77442		0.3226	0.466959	0.646416	1.10527	1.75882		0.244496	0.484637	0.626717	1.08857	1.75956			VQKYHPCF	139	146	1021.49	6	3.27982		-0.006049	-0.007805	0.012717	0.066436	0.026591
					QKYHPCF	140	146	922.424	5	3.27995		0.191069	0.441968	0.5911	1.10597	1.72183		0.187012	0.443111	0.586323	1.06744	1.6809		0.218267	0.437182	0.628961	1.10124	1.71919		0.182385	0.436868	0.597971	1.01486	1.69097			QKYHPCF	140	146	922.424	5	3.27995		-0.004057	0.001143	-0.004777	-0.038524	-0.040933
					WIDGQYL	147	153	894.436	6	5.11461		0.796984	1.14176	1.29301	2.12517	2.72285		0.787498	1.11758	1.38111	2.10121	2.76268		0.752466	1.12649	1.33178	2.1487	2.66557		0.800853	1.18817	1.40832	2.16372	2.72296			WIDGQYL	147	153	894.436	6	5.11461		-0.009486	-0.024177	0.088098	-0.023965	0.039829
					LCCSQTAKNAMGCQ	153	166	1457.6	13	3.04361		4.7533	6.10281	6.92985	7.3683	7.74007		4.67723	6.00593	6.80128	7.28712	7.7597		4.50201	6.14646	6.87087	7.37407	7.74447		4.60631	6.20455	6.86549	7.34924	7.78692			LCCSQTAKNAMGCQ	153	166	1457.6	13	3.04361		-0.07607	-0.096878	-0.128571	-0.081183	0.019624
					CCSQTAKNAMGCQ	154	166	1344.52	12	2.28844		4.57462	5.80225	6.54542	7.03945	7.38421		4.45862	5.73334	6.40124	6.92332	7.33997		4.55006	5.66782	6.51651	6.98788	7.40219		4.50837	5.81735	6.56772	6.96404	7.47799			CCSQTAKNAMGCQ	154	166	1344.52	12	2.28844		-0.116	-0.068907	-0.144181	-0.116128	-0.044233
					SQTAKNAMGC	156	165	1010.44	9	1.96993		4.41953	5.3415	5.88646	5.87646	5.93108		4.29154	5.21933	5.75971	5.81711	5.91546		4.4823	5.37556	5.90074	5.88394	6.02914		4.30631	5.21349	5.74505	5.8352	5.79761			SQTAKNAMGC	156	165	1010.44	9	1.96993		-0.127993	-0.122169	-0.126743	-0.059345	-0.015618
					SQTAKNAMGCQ	156	166	1138.5	10	1.80376		3.7663	4.83053	5.32979	5.52329	5.95755		3.68507	4.77886	5.18939	5.45122	5.83932		3.67073	4.77515	5.23708	5.45189	5.86587		3.75718	4.70776	5.23604	5.43291	5.88377			SQTAKNAMGCQ	156	166	1138.5	10	1.80376		-0.081229	-0.051668	-0.140399	-0.072074	-0.118231
					SQTAKNAMGCQIL	156	168	1364.67	12	3.94812		4.33253	5.68395	6.77984	7.16772	7.61474		4.24392	5.54495	6.64069	7.08669	7.71085		4.40608	5.67306	6.7282	7.15689	7.57065		4.30675	5.75305	6.76103	7.07922	7.59115			SQTAKNAMGCQIL	156	168	1364.67	12	3.94812		-0.088612	-0.138997	-0.139152	-0.081026	0.096112
					ILENRNGSLKPGSS	167	180	1471.79	12	2.14622		7.56675	7.62646	7.52083	7.59715	7.5655		7.34521	7.34441	7.34584	7.48707	7.48633		7.40946	7.49528	7.34203	7.58171	7.43308		7.55476	7.6185	7.39976	7.45022	7.44928			ILENRNGSLKPGSS	167	180	1471.79	12	2.14622		-0.221542	-0.282055	-0.174983	-0.110082	-0.079177
					DQILKKPLPPEPTAAPIST	195	213	2016.14	13	3.26869		9.65491	9.74728	9.74191	9.69175	9.73039		9.48057	9.52915	9.57092	9.57242	9.62908		9.64362	9.57362	9.47679	9.70615	9.70085		9.76684	9.63957	9.62918	9.61233	9.67484			DQILKKPLPPEPTAAPIST	195	213	2016.14	13	3.26869		-0.17434	-0.21813	-0.170992	-0.119329	-0.101313
					DQILKKPLPPEPTAAPISTTE	195	215	2246.23	15	3.29103		10.8376	10.9538	10.9358	10.9164	10.9805		10.6373	10.7592	10.7308	10.8174	10.8411		10.709	10.7681	10.7643	10.9579	10.8748		10.8091	10.7977	10.7666	10.7909	10.8274			DQILKKPLPPEPTAAPISTTE	195	215	2246.23	15	3.29103		-0.200298	-0.19469	-0.204908	-0.098929	-0.139397
					DQILKKPLPPEPTAAPISTTEL	195	216	2359.31	16	3.94773		11.6061	11.6632	11.6935	11.7573	11.6837		11.5023	11.3704	11.5711	11.4928	11.6487		11.639	11.4895	11.4855	11.7703	11.6921		11.6355	11.5322	11.4719	11.5394	11.622			DQILKKPLPPEPTAAPISTTEL	195	216	2359.31	16	3.94773		-0.103817	-0.292754	-0.122371	-0.264535	-0.034931
					QILKKPLPPEPTAAPIST	196	213	1901.11	12	3.07274		9.02862	8.97525	9.00317	9.00134	9.06394		8.79236	8.94055	8.99481	8.89841	8.95723		8.88319	8.9225	8.83319	9.00715	9.04024		8.97567	8.98547	9.11332	8.97323	9.06811			QILKKPLPPEPTAAPIST	196	213	1901.11	12	3.07274		-0.236266	-0.034699	-0.008363	-0.102925	-0.106709
					QILKKPLPPEPTAAPISTTE	196	215	2131.2	14	3.10044		10.1594	10.2534	10.2673	10.3357	10.2587		10.1203	10.1358	10.1428	10.2091	10.3872		10.0571	10.153	10.1237	10.2473	10.2719		10.1951	10.2325	10.1702	10.124	10.1805			QILKKPLPPEPTAAPISTTE	196	215	2131.2	14	3.10044		-0.039128	-0.117612	-0.12446	-0.126529	0.128426
					ILKKPLPPEPTAAPIST	197	213	1773.05	11	2.91228		8.06638	8.05156	8.00096	8.0048	7.96635		7.86475	7.9525	7.82898	8.02008	7.96038		7.92518	8.0379	7.94278	8.06497	8.03366		8.03829	7.96302	7.92226	7.98436	7.9554			ILKKPLPPEPTAAPIST	197	213	1773.05	11	2.91228		-0.201637	-0.099057	-0.171986	0.015276	-0.005968
					TELKKVVAL	214	222	1000.64	8	3.04139		1.174	2.01083	2.62232	3.89126	5.2496		1.1894	2.04268	2.83999	4.52697	5.39672		1.14298	2.01357	2.8126	4.44372	5.47554		1.12614	1.98098	2.35691	3.00513	4.2587			TELKKVVAL	214	222	1000.64	8	3.04139		0.015403	0.031849	0.217669	0.635709	0.147115
					LKKVVAL	216	222	770.55	6	2.51317		0.14466	0.405526	0.862918	1.93644	3.13052		0.14833	0.410845	1.05581	2.49546	3.37095		0.155436	0.39377	0.997361	2.42134	3.41015		0.120486	0.339196	0.643013	1.17818	2.26814			LKKVVAL	216	222	770.55	6	2.51317		0.00367	0.005319	0.192889	0.559024	0.240433
					YDYMPMNA	223	230	1004.39	6	4.29836		2.32655	2.94933	3.05994	3.3575	3.60245		2.6462	3.00691	3.06292	3.38081	3.66888		2.60626	2.96224	2.99596	3.45437	3.69566		1.82099	2.75634	2.95592	3.11561	3.30408			YDYMPMNA	223	230	1004.39	6	4.29836		0.319651	0.057582	0.002978	0.023309	0.066432
					YDYMPMNAND	223	232	1233.46	8	4.03259		2.94888	3.56686	3.82739	4.38118	4.71406		3.26457	3.67141	4.02696	4.53207	4.897		3.18604	3.59584	3.93362	4.48019	4.84366		2.5925	3.41985	3.69735	4.16907	4.47112			YDYMPMNAND	223	232	1233.46	8	4.03259		0.315694	0.104555	0.199569	0.150891	0.182942
					LQLRKGEE	233	240	972.547	7	1.85878		0.304705	0.42567	1.2033	2.89556	4.11176		0.348479	0.52357	1.5878	3.59796	4.3213		0.314014	0.398697	1.59243	3.35681	4.32583		0.296405	0.367959	1.10205	2.11199	3.4116			LQLRKGEE	233	240	972.547	7	1.85878		0.043774	0.0979	0.3845	0.702402	0.209534
					LQLRKGEEY	233	241	1135.61	8	2.64051		0.253586	0.362565	1.24862	2.77057	3.97985		0.299842	0.429374	1.58385	3.38192	4.34665		0.279189	0.366778	1.44754	3.24757	4.34908		0.23351	0.292243	0.949726	1.98433	3.23183			LQLRKGEEY	233	241	1135.61	8	2.64051		0.046256	0.066809	0.335231	0.611355	0.366799
					LQLRKGEEYF	233	242	1282.68	9	3.79114		0.117562	0.224608	1.10796	3.05605	4.71217		0.223978	0.330678	1.51423	3.8804	5.22356		0.193053	0.256059	1.51039	3.65227	5.09514		0.143771	0.213207	0.867467	1.99123	3.5432			LQLRKGEEYF	233	242	1282.68	9	3.79114		0.106416	0.10607	0.406269	0.824354	0.511388
					QLRKGEEY	234	241	1022.53	7	2.63909		0.344283	0.129993	1.24746	2.94189	4.09201		0.321295	0.618977	1.66057	3.58135	4.39131		0.395214	0.385109	1.33221	3.33853	4.42857		0.084001	0.042575	0.870594	1.80291	3.06676			QLRKGEEY	234	241	1022.53	7	2.63909		-0.022988	0.488984	0.413113	0.639465	0.299295
					RKGEEYF	236	242	928.452	6	3.03946		0.211551	0.296819	0.781116	1.61269	2.41006		0.116064	0.299141	0.908458	1.95316	2.63145		0.181249	0.263364	0.908477	1.91233	2.66398		0.197176	0.266168	0.64625	1.30655	1.90088			RKGEEYF	236	242	928.452	6	3.03946		-0.095487	0.002322	0.127342	0.340466	0.221385
					ILEESNLPWWRARDKNGQEGYIPSN	243	267	2972.46	22	4.51444		3.82076	5.10578	7.54121	10.5181	12.2818		3.89782	5.10494	8.17297	11.4345	12.7293		3.88784	5.13021	7.79061	11.3512	12.757		3.69667	4.84051	6.76788	9.07221	10.9846			ILEESNLPWWRARDKNGQEGYIPSN	243	267	2972.46	22	4.51444		0.077056	-0.000838	0.631758	0.916328	0.447463
					ILEESNLPWWRARDKNGQEGYIPSNY	243	268	3135.53	23	4.76751		3.45673	4.59199	7.18581	10.6116	12.4141		3.47505	4.69213	7.82377	11.3827	12.7715		3.45153	4.59619	7.67139	11.2652	12.7522		3.22345	4.38784	6.41141	8.84537	11.086			ILEESNLPWWRARDKNGQEGYIPSNY	243	268	3135.53	23	4.76751		0.018326	0.100139	0.637961	0.771151	0.357437
					EESNLPWWRARDKNGQEGYIPSN	245	267	2746.3	20	4.18484		2.915	4.06834	6.25865	9.25507	10.8746		2.99783	4.21119	6.98996	10.0746	11.3326		2.93235	4.15739	6.73103	9.95792	11.2462		2.69354	3.91569	5.63736	7.77004	9.73138			EESNLPWWRARDKNGQEGYIPSN	245	267	2746.3	20	4.18484		0.082827	0.142851	0.731308	0.819574	0.45806
					EESNLPWWRARDKNGQEGYIPSNY	245	268	2909.36	21	4.50002		2.83405	3.94279	6.18196	9.58435	11.5558		2.86956	4.06857	7.04659	10.6677	11.9608		2.8112	4.07457	6.74688	10.4523	11.908		2.57545	3.83115	5.54124	7.90758	10.1364			EESNLPWWRARDKNGQEGYIPSNY	245	268	2909.36	21	4.50002		0.035505	0.125774	0.864629	1.08331	0.405023
					ESNLPWWRARDKNGQEGYIPSNY	246	268	2780.32	20	4.47594		2.27019	3.47075	5.63633	9.18696	10.9764		2.39118	3.52465	6.45494	10.0697	11.3482		2.35767	3.64648	6.27851	10.0303	11.4036		2.08149	3.26283	5.09499	7.29102	9.7299			ESNLPWWRARDKNGQEGYIPSNY	246	268	2780.32	20	4.47594		0.12099	0.053899	0.818611	0.882745	0.371767
					AEDSIEM	272	278	794.324	6	3.45699		2.41541	2.88455	3.18373	3.22614	3.2612		2.44966	2.93122	3.19098	3.21816	3.24772		2.4234	2.88759	3.15683	3.25163	3.24981		2.2571	2.74357	3.16135	3.22967	3.22036			AEDSIEM	272	278	794.324	6	3.45699		0.034251	0.04668	0.007243	-0.007974	-0.013488
					YEWYSKHMTRSQAEQL	279	294	2056.95	15	3.68793		2.563	3.4037	4.84979	6.4546	7.76325		2.64092	3.48316	5.18737	6.9525	7.957		2.63724	3.50561	5.02985	6.84377	7.88468		2.32874	3.15443	4.29731	5.72648	7.05257			YEWYSKHMTRSQAEQL	279	294	2056.95	15	3.68793		0.07792	0.079465	0.337573	0.497906	0.19375
					WYSKHMTRSQAEQL	281	294	1764.85	13	2.96645		2.96121	3.67877	4.22822	5.64964	6.9092		3.09013	3.68724	4.3003	6.00748	7.04263		2.98834	3.52375	4.27485	5.95106	7.02935		2.67094	3.51444	3.85231	4.72812	6.04724			WYSKHMTRSQAEQL	281	294	1764.85	13	2.96645		0.128923	0.008475	0.072087	0.357839	0.133425
					YSKHMTRSQAEQL	282	294	1578.77	12	2.21351		2.87186	3.47909	3.76202	5.14864	6.44327		3.0024	3.5564	3.95515	5.64628	6.53876		2.95544	3.48244	3.9978	5.59682	6.64179		2.69622	3.47815	3.54644	4.38521	5.62626			YSKHMTRSQAEQL	282	294	1578.77	12	2.21351		0.130537	0.077306	0.193131	0.497641	0.095483
					LLKQEGKEGGF	294	304	1205.65	10	2.66237		1.64509	2.21081	3.49893	4.91995	5.56911		1.55885	2.42053	3.93387	5.33461	5.5857		1.74046	2.24078	3.88847	5.14215	5.62592		1.61013	2.14279	3.38829	4.38893	5.25112			LLKQEGKEGGF	294	304	1205.65	10	2.66237		-0.086242	0.209725	0.434944	0.414665	0.016592
					LKQEGKEGGF	295	304	1092.57	9	2.15265		1.4894	2.10145	3.40639	4.39008	4.75486		1.53817	2.16082	3.60331	4.62507	4.82378		1.54841	2.08109	3.5371	4.60771	4.82616		1.394	1.98715	3.15912	4.03655	4.61622			LKQEGKEGGF	295	304	1092.57	9	2.15265		0.04877	0.059371	0.196914	0.234985	0.068921
					IVRDSSKAGKYTVSV	305	319	1609.89	14	2.6422		3.86327	4.43898	5.11244	6.93312	8.18477		3.82457	4.48293	5.50254	7.52929	8.33764		3.81399	4.4114	5.35366	7.40551	8.4081		3.80166	4.3439	4.75494	5.79724	7.40656			IVRDSSKAGKYTVSV	305	319	1609.89	14	2.6422		-0.0387	0.043952	0.390102	0.596173	0.152878
					FAKSTGEPQGVIRH	320	333	1526.81	12	2.07104		5.28	6.20746	6.81856	7.1351	7.47526		5.08271	6.07067	6.77238	7.15758	7.37353		5.10286	5.98092	6.66333	7.15274	7.37838		5.17501	5.91019	6.54837	6.86231	7.21511			FAKSTGEPQGVIRH	320	333	1526.81	12	2.07104		-0.197289	-0.136791	-0.046172	0.022473	-0.101731
					FAKSTGEPQGVIRHYVV	320	336	1888.01	15	3.45582		4.83967	6.24497	6.94212	7.84269	8.61055		5.07304	6.17423	6.94226	8.05093	8.78837		5.10921	6.22075	7.00829	8.12565	8.77301		5.05366	6.13649	6.64472	7.17864	8.00705			FAKSTGEPQGVIRHYVV	320	336	1888.01	15	3.45582		0.233373	-0.070735	0.00014	0.208242	0.177816
					FAKSTGEPQGVIRHYVVC	320	337	1991.02	16	3.6503		5.022	6.19772	7.11971	8.40708	9.32423		4.9858	6.16443	7.06192	8.72212	9.4478		5.01721	6.21735	7.05846	8.67214	9.47924		4.88393	6.02493	6.71758	7.52131	8.49484			FAKSTGEPQGVIRHYVVC	320	337	1991.02	16	3.6503		-0.036197	-0.033284	-0.057783	0.315039	0.123574
					FAKSTGEPQGVIRHYVVCSTPQSQY	320	344	2782.36	22	3.83976		6.66343	8.61621	10.5966	12.3708	13.651		6.51859	8.43784	10.6606	12.8679	13.7059		6.50017	8.53992	10.6601	12.9339	13.8412		6.40441	8.26957	9.98078	11.3269	12.8349			FAKSTGEPQGVIRHYVVCSTPQSQY	320	344	2782.36	22	3.83976		-0.144841	-0.178368	0.064044	0.497074	0.054859
					AKSTGEPQGVIRHYVVCSTPQSQ	321	343	2472.23	20	3.39925		6.19618	7.95987	9.61995	11.15	12.3692		6.12846	7.79726	9.79394	11.6889	12.5197		6.0476	7.97137	9.73733	11.8078	12.5212		6.13791	7.81405	9.12957	10.4067	11.5531			AKSTGEPQGVIRHYVVCSTPQSQ	321	343	2472.23	20	3.39925		-0.067716	-0.162605	0.173988	0.538897	0.150583
					AKSTGEPQGVIRHYVVCSTPQSQY	321	344	2635.29	21	3.75883		6.12018	7.94031	9.87841	11.8509	12.9747		6.08411	7.8556	10.24	12.2439	12.9885		6.15692	8.00401	10.1293	12.1943	13.1099		5.88859	7.75641	9.38771	10.8079	12.1799			AKSTGEPQGVIRHYVVCSTPQSQY	321	344	2635.29	21	3.75883		-0.036072	-0.084717	0.361619	0.392985	0.013717
					YVVCSTPQSQY	334	344	1274.57	9	3.52138		1.56401	2.20293	3.64136	4.8857	5.45893		1.53323	2.22681	3.91371	5.11425	5.5722		1.55209	2.12386	3.77289	4.99607	5.75145		1.52646	2.13029	3.21818	4.2405	5.14694			YVVCSTPQSQY	334	344	1274.57	9	3.52138		-0.030781	0.023873	0.272348	0.228546	0.113268
					YYLAEKHLFSTIPEL	344	358	1823.96	13	5.23596		2.23388	3.43803	4.90514	6.09469	6.68252		2.25117	3.37947	5.01588	6.29084	6.73721		2.22793	3.41714	4.9816	6.33175	6.7168		2.20329	3.31122	4.73743	5.7573	6.36409			YYLAEKHLFSTIPEL	344	358	1823.96	13	5.23596		0.017292	-0.058558	0.110733	0.19614	0.054692
					YLAEKHL	345	351	873.483	6	2.32944		2.19873	3.13701	3.07256	3.08176	3.10434		2.15802	2.94068	3.08751	3.00091	2.99528		2.25813	3.22621	3.17659	3.13525	3.15517		2.10727	3.04187	3.02455	3.13844	3.23097			YLAEKHL	345	351	873.483	6	2.32944		-0.040712	-0.196335	0.014946	-0.080849	-0.109065
					YLAEKHLFSTIPEL	345	358	1660.89	12	4.97963		2.0784	3.1377	4.23961	5.14968	5.74758		1.99881	3.08782	4.4009	5.41914	5.73595		2.02542	3.07351	4.43783	5.42848	5.73348		2.00264	3.05827	4.15506	4.83361	5.44229			YLAEKHLFSTIPEL	345	358	1660.89	12	4.97963		-0.079588	-0.049882	0.161291	0.269458	-0.011624
					LAEKHLFSTIPEL	346	358	1497.83	11	4.75533		1.83858	2.74567	3.84684	4.75957	5.22657		1.71541	2.63948	3.95408	4.80427	5.21362		1.72691	2.57321	3.83778	4.93004	5.11483		1.75792	2.5733	3.56527	4.36884	4.90471			LAEKHLFSTIPEL	346	358	1497.83	11	4.75533		-0.123177	-0.10619	0.107245	0.044697	-0.012949
					LAEKHLFSTIPELINYHQHNSAG	346	368	2619.33	21	3.58961		6.9455	8.8265	10.626	12.1273	13.1442		6.84165	8.86279	10.785	12.629	13.3284		6.74727	8.92651	10.7521	12.4595	13.3059		6.79644	8.71145	10.219	11.3132	12.6045			LAEKHLFSTIPELINYHQHNSAG	346	368	2619.33	21	3.58961		-0.103852	0.036292	0.158975	0.5017	0.184205
					TIPELINYHQHNSAGLISRLKY	354	375	2567.37	20	4.2435		2.9874	3.86985	5.72549	7.81419	8.97319		2.91029	3.74943	5.60206	7.70358	8.87871		2.9871	3.74983	5.62599	7.84493	8.94059		2.95226	3.75329	5.63517	7.69108	8.92441			TIPELINYHQHNSAGLISRLKY	354	375	2567.37	20	4.2435		-0.077109	-0.120428	-0.123433	-0.110607	-0.094484
					INYHQHNSAGL	359	369	1253.6	10	2.44847		2.55077	2.66697	2.88428	3.53587	3.80049		2.55627	2.65435	3.04806	3.6894	3.81527		2.58515	2.58721	2.9865	3.64752	3.79326		2.57031	2.61905	2.7577	3.28565	3.74691			INYHQHNSAGL	359	369	1253.6	10	2.44847		0.005496	-0.012616	0.163777	0.153535	0.014779
					NYHQHNSAGL	360	369	1140.52	9	2.44776		2.50335	2.60709	2.89696	3.4828	3.75068		2.56511	2.58703	3.04215	3.62546	3.75717		2.55642	2.53296	2.95019	3.66282	3.77639		2.56485	2.60625	2.69627	3.14683	3.71258			NYHQHNSAGL	360	369	1140.52	9	2.44776		0.061759	-0.020069	0.145186	0.142662	0.006491
					HQHNSAGL	362	369	863.412	7	1.30708		2.8361	2.87683	2.72783	2.77931	2.86176		2.77963	2.78697	2.84894	2.83179	2.86648		2.74648	2.83131	2.72446	2.7975	2.8193		2.775	2.79486	2.81647	2.76812	2.80753			HQHNSAGL	362	369	863.412	7	1.30708		-0.05647	-0.089852	0.12111	0.052475	0.004713
					ISRLKYPVSKQNKNAPSTAGL	370	390	2272.28	18	2.72166		8.14494	8.68015	10.1984	11.6661	11.6808		8.03555	8.67271	10.5537	11.6337	11.6468		7.99722	8.68174	10.4266	11.5904	11.6176		7.82873	8.35994	9.47724	11.3165	11.6657			ISRLKYPVSKQNKNAPSTAGL	370	390	2272.28	18	2.72166		-0.109392	-0.007447	0.355301	-0.032418	-0.033972
					ISRLKYPVSKQNKNAPSTAGLG	370	391	2329.3	19	2.57835		9.01432	9.59544	11.1404	12.576	12.6278		9.04986	9.57869	11.2709	12.4706	12.5431		9.12764	9.7491	11.1402	12.6856	12.6135		8.51873	9.26876	10.3515	12.1462	12.4632			ISRLKYPVSKQNKNAPSTAGLG	370	391	2329.3	19	2.57835		0.035534	-0.016758	0.130519	-0.105403	-0.084722
					ISRLKYPVSKQNKNAPSTAGLGYGSW	370	395	2822.49	23	3.80539		10.9904	11.6793	13.1326	14.5198	14.4916		11.0992	11.6644	13.4408	14.4821	14.5002		11.0623	11.8736	13.3006	14.5744	14.5695		10.6034	11.4007	12.3193	14.168	14.5506			ISRLKYPVSKQNKNAPSTAGLGYGSW	370	395	2822.49	23	3.80539		0.108771	-0.014882	0.308168	-0.037766	0.008531
					EIDPKDLTF	396	404	1077.55	7	4.55568		2.34622	2.92104	3.76574	4.22215	4.29307		2.15415	2.6148	3.56987	4.21286	4.35762		1.98435	2.35281	3.32425	3.85315	4.19032		2.05872	2.15503	2.61024	3.47264	3.79972			EIDPKDLTF	396	404	1077.55	7	4.55568		-0.19207	-0.306244	-0.195869	-0.009285	0.06456
					EIDPKDLTFL	396	405	1190.63	8	5.25907		2.22376	3.00331	3.71445	4.30562	4.41925		2.00662	2.83661	3.70079	4.23289	4.4117		1.85865	2.53292	3.46198	4.00098	4.3305		1.67926	2.07246	2.84293	3.59206	3.89646			EIDPKDLTFL	396	405	1190.63	8	5.25907		-0.217141	-0.166708	-0.013665	-0.07273	-0.007548
					FLKELGTGQF	404	413	1139.61	9	4.35682		4.78948	5.56823	5.67531	5.71573	5.65962		4.74398	5.15843	5.25721	5.53248	5.63666		4.41558	5.45239	5.59098	5.75294	5.73402		3.31905	4.09422	4.91625	5.34449	5.52669			FLKELGTGQF	404	413	1139.61	9	4.35682		-0.045505	-0.409796	-0.4181	-0.183259	-0.022959
					LKELGTGQF	405	413	992.541	8	3.64233		4.84797	5.1117	5.18475	5.19573	5.14778		4.69276	4.95614	5.05845	4.99934	5.13993		4.44224	4.95088	5.04183	5.1724	5.17146		3.58736	4.00634	4.38689	4.92373	5.13003			LKELGTGQF	405	413	992.541	8	3.64233		-0.155203	-0.155559	-0.126299	-0.196394	-0.007846
					LKELGTGQFGVVKYGKWRGQY	405	425	2414.3	20	4.02069		6.49151	9.01825	11.292	11.934	12.0276		5.7926	7.37039	9.71708	11.1984	11.9306		5.64753	6.98274	8.99982	10.8865	11.7546		3.8497	5.26392	7.14937	8.65759	10.194			LKELGTGQFGVVKYGKWRGQY	405	425	2414.3	20	4.02069		-0.698915	-1.64786	-1.57494	-0.735534	-0.096958
					KELGTGQF	406	413	879.457	7	3.09058		3.7683	3.99458	4.06755	4.1041	4.19928		3.65913	3.94141	3.94732	4.0585	4.11278		3.56594	3.78248	4.04459	4.1001	4.14032		2.79396	3.13265	3.49804	3.93864	4.14551			KELGTGQF	406	413	879.457	7	3.09058		-0.109172	-0.053161	-0.120234	-0.045599	-0.086508
					GVVKYGKWRGQY	414	425	1440.77	11	3.2346		2.34096	4.37656	7.14831	7.64341	7.64957		1.70593	2.81838	5.26089	6.91509	7.40782		1.76182	2.68543	4.52951	6.29484	7.30201		1.35655	2.03456	3.10415	4.18228	5.51212			GVVKYGKWRGQY	414	425	1440.77	11	3.2346		-0.635023	-1.55817	-1.88742	-0.728316	-0.241755
					GVVKYGKWRGQYDVA	414	428	1725.91	14	3.34256		2.42323	4.20447	7.05735	7.63241	8.07945		1.78593	2.83404	5.19067	6.78841	7.45639		1.90903	2.77738	4.6878	6.32841	7.37446		1.53192	2.18941	3.18937	4.0967	5.39242			GVVKYGKWRGQYDVA	414	428	1725.91	14	3.34256		-0.637304	-1.37043	-1.86668	-0.844008	-0.623062
					VKYGKWRGQY	416	425	1284.68	9	3.23737		1.89347	3.38629	5.27998	5.80782	5.91625		1.39492	2.26463	4.19849	5.36679	5.75951		1.42309	2.08666	3.57564	4.80553	5.57802		1.10012	1.60644	2.49464	3.34827	4.3045			VKYGKWRGQY	416	425	1284.68	9	3.23737		-0.498542	-1.12166	-1.08149	-0.441025	-0.15674
					IREGSMSE	432	439	908.414	7	1.9805		4.00308	4.1956	4.1108	4.16196	4.20565		3.96263	4.01989	4.04095	4.15424	4.15081		4.0461	3.96852	4.08813	4.11741	4.15612		2.31631	3.23975	4.14811	4.13946	4.13491			IREGSMSE	432	439	908.414	7	1.9805		-0.040449	-0.175711	-0.069844	-0.007725	-0.054841
					IREGSMSEDE	432	441	1152.48	9	2.1891		4.33317	4.80155	4.71878	4.72683	4.779		4.31268	4.5226	4.48455	4.58888	4.62714		4.31586	4.45158	4.59923	4.7163	4.60715		2.69511	3.69213	4.49026	4.5822	4.62644			IREGSMSEDE	432	441	1152.48	9	2.1891		-0.020496	-0.278952	-0.234236	-0.137946	-0.151863
					IREGSMSEDEF	432	442	1299.55	10	3.6708		3.79232	4.21568	4.66592	4.81097	4.9018		3.72714	4.19283	4.58246	4.67624	4.74194		3.75847	4.07375	4.56327	4.76008	4.78099		2.42827	3.32898	4.26465	4.63292	4.86372			IREGSMSEDEF	432	442	1299.55	10	3.6708		-0.065186	-0.022852	-0.083467	-0.134733	-0.159862
					IEEAKVMMNLSHEKL	443	457	1771.91	14	4.14274		1.92621	2.96997	5.28148	6.81151	7.61506		1.55527	2.79547	4.5149	6.66817	7.6459		1.53781	2.67394	4.87566	6.9811	7.60977		1.0997	2.31178	3.88574	5.42423	6.85993			IEEAKVMMNLSHEKL	443	457	1771.91	14	4.14274		-0.370939	-0.174499	-0.766581	-0.143334	0.030839
					AKVMMNLSHEKL	446	457	1400.74	11	3.25573		1.18538	1.97068	3.38198	4.37371	5.02614		1.01724	1.72005	3.02622	4.42059	4.97935		1.04457	1.74477	3.15026	4.60463	5.03765		0.762391	1.42742	2.54625	3.62462	4.47256			AKVMMNLSHEKL	446	457	1400.74	11	3.25573		-0.168145	-0.250626	-0.355757	0.046881	-0.046788
					KVMMNLSHEKL	447	457	1329.7	10	3.1419		1.16335	1.67239	2.58462	3.57781	4.28613		0.991873	1.61132	2.32655	3.62369	4.33807		1.1814	1.67141	2.6116	3.85727	4.34851		0.752954	1.18563	1.88178	2.78407	3.74562			KVMMNLSHEKL	447	457	1329.7	10	3.1419		-0.171472	-0.061068	-0.258074	0.045884	0.051939
					NLSHEKL	451	457	840.457	6	2.1483		0.901784	1.09879	1.14258	1.41867	1.7797		0.782977	1.01032	1.1506	1.52155	1.72804		0.862527	0.968942	1.18036	1.5169	1.72805		0.66732	0.89854	1.18774	1.51092	1.78564			NLSHEKL	451	457	840.457	6	2.1483		-0.118807	-0.08847	0.008013	0.102875	-0.051655
					YGVCTKQRPIF	461	471	1311.69	9	3.73243		1.75525	2.21201	2.45785	3.17338	3.75444		1.52862	1.94184	2.31881	2.93852	3.54682		1.63097	1.92587	2.37069	3.07135	3.55894		1.7984	2.13141	2.26706	2.38158	2.73809			YGVCTKQRPIF	461	471	1311.69	9	3.73243		-0.226634	-0.27017	-0.139035	-0.234854	-0.207617
					GVCTKQRPIF	462	471	1148.62	8	3.73216		1.6037	1.98787	2.27124	2.82144	3.36165		1.40334	1.77346	2.10461	2.64288	3.19912		1.55343	1.78398	2.17528	2.79978	3.23923		1.60397	1.89654	2.1363	2.15564	2.41656			GVCTKQRPIF	462	471	1148.62	8	3.73216		-0.200359	-0.214403	-0.166632	-0.17856	-0.162531
					TKQRPIF	465	471	889.525	5	2.87963		1.01015	1.26057	1.47597	1.75113	2.20441		0.854604	1.15421	1.35654	1.59662	2.02802		0.969832	1.16688	1.4642	1.78829	2.15254		0.987504	1.30259	1.40382	1.42179	1.5734			TKQRPIF	465	471	889.525	5	2.87963		-0.155542	-0.106358	-0.119422	-0.154501	-0.176383
					YMANGCL	476	482	771.316	6	3.84715		1.62465	2.05182	2.47833	2.53967	2.61816														0.53479	0.956791	1.46888	1.77896	2.21954			YMANGCL	476	482	771.316	6	3.84715
					LNYLREMRHRFQTQQL	483	498	2133.11	15	4.3056		4.79526	5.59856	6.7675	6.79948	7.06258														4.6098	5.34507	6.42901	6.54316	6.9034			LNYLREMRHRFQTQQL	483	498	2133.11	15	4.3056
					LREMRHRFQTQQL	486	498	1742.92	12	2.60127		4.425	5.17916	5.84327	5.89837	5.95477		3.6507	4.49765	5.26645	5.28185	5.42237		3.99028	4.89309	5.55945	5.63673	5.61979		4.1634	4.9847	5.57603	5.85419	5.78806			LREMRHRFQTQQL	486	498	1742.92	12	2.60127		-0.774301	-0.681517	-0.576821	-0.616521	-0.532401
					MRHRFQTQQL	489	498	1344.7	9	2.42497		2.80608	3.49363	3.97227	4.07116	3.93369		2.48834	3.1215	3.70418	3.62261	3.99619		2.54824	3.1445	3.83086	3.71136	3.74402		2.69405	3.36765	3.92683	3.86196	3.992			MRHRFQTQQL	489	498	1344.7	9	2.42497		-0.31774	-0.372122	-0.268097	-0.44855	0.062498
					CKDVCEAM	502	509	898.347	7	2.95334		0.132433	0.115993	0.048434	0.156973	0.107255		0.052709	0.027541	0.023331	0.047913	0.064236		0.073465	-0.089582	0.048045	0.042205	0.030216		0.061381	-0.008022	0.04302	0.018187	0.049514			CKDVCEAM	502	509	898.347	7	2.95334		-0.079724	-0.088452	-0.025103	-0.10906	-0.043019
					MEYLESKQFL	509	518	1287.63	9	4.68854		0.24743	0.724896	1.69889	3.33857	3.55436		0.075638	0.672359	1.70745	3.08694	3.47234		0.431596	1.11562	2.60275	3.26842	3.57022		0.190614	0.656695	1.45266	2.43311	3.1228			MEYLESKQFL	509	518	1287.63	9	4.68854		-0.171792	-0.052537	0.008559	-0.25163	-0.082028
					EYLESKQFL	510	518	1156.59	8	4.33198		0.18346	0.669098	1.78492	2.97011	3.48776		0.250785	0.725655	1.81234	2.95971	3.45668		0.374293	1.1675	2.50071	3.42263	3.49552		0.196982	0.57981	1.38609	2.38674	2.8907			EYLESKQFL	510	518	1156.59	8	4.33198		0.067325	0.056557	0.027418	-0.010396	-0.031078
					YLESKQFL	511	518	1027.55	7	4.13524		0.201692	0.60779	1.69222	2.72051	3.11821		0.188584	0.597556	1.62359	2.66184	3.04987		0.399005	1.06499	2.27331	2.94139	3.07452		0.147195	0.447111	1.24614	2.17865	2.48691			YLESKQFL	511	518	1027.55	7	4.13524		-0.013108	-0.010234	-0.068638	-0.058669	-0.068347
					YLESKQFLHRDLAARNCL	511	528	2177.13	17	3.70188		0.46331	1.19594	2.95527	4.38186	5.10018		0.503601	1.32985	3.0686	4.27419	4.82243		0.918227	2.28441	4.04758	5.35695	6.18412		0.395563	0.882179	2.04424	3.40385	3.89838			YLESKQFLHRDLAARNCL	511	528	2177.13	17	3.70188		0.040291	0.133902	0.113328	-0.107676	-0.277752
					ESKQFLHRDLAARNCL	513	528	1900.98	15	3.19142		0.526583	1.34061	2.95013	4.03493	4.72993		0.594345	1.57033	3.12644	4.00542	4.55981		1.14516	2.23561	3.82267	5.01086	6.13786		0.512503	1.11317	1.95074	3.14727	3.60413			ESKQFLHRDLAARNCL	513	528	1900.98	15	3.19142		0.067762	0.229721	0.176307	-0.029511	-0.170125
					LHRDLAARNC	518	527	1168.6	9	2.36122		0.385115	0.589321	1.26101	1.82198	2.21126		0.345994	0.611175	1.46588	1.73412	1.97088		0.70757	1.12737	1.80869	2.58772	3.30406		0.283873	0.394654	0.945482	1.47825	1.70343			LHRDLAARNC	518	527	1168.6	9	2.36122		-0.039121	0.021854	0.20487	-0.087866	-0.240378
					RNCLVNDQGVVKVSDF	525	540	1792.9	15	4.20076		1.48812	2.50279	2.91207	3.43045	3.84699		0.961823	1.93307	2.46202	3.05041	3.37694		1.09629	2.10026	2.78473	3.29864	3.79674		0.964062	1.80617	2.13384	2.38266	2.77544			RNCLVNDQGVVKVSDF	525	540	1792.9	15	4.20076		-0.526299	-0.569721	-0.45005	-0.380043	-0.470048
					RNCLVNDQGVVKVSDFGL	525	542	1963.01	17	4.83157		2.04614	3.56432	4.35302	4.66385	5.06895		1.19491	2.591	3.67515	4.32992	4.77966		1.3601	3.12741	3.99219	4.48047	5.02166		0.948637	1.75404	2.26467	2.91906	3.89535			RNCLVNDQGVVKVSDFGL	525	542	1963.01	17	4.83157		-0.851229	-0.973322	-0.677873	-0.33393	-0.289286
					CLVNDQGVVKVSD	527	539	1375.69	12	3.35289		1.70512	2.31398	2.36544	2.88362	3.31557		1.16544	2.0347	2.3444	2.59475	3.07263		1.2974	2.04949	2.42381	2.72619	3.21577		1.25068	2.01243	2.34436	2.57824	2.67648			CLVNDQGVVKVSD	527	539	1375.69	12	3.35289		-0.53968	-0.279274	-0.021044	-0.288877	-0.242942
					CLVNDQGVVKVSDF	527	540	1522.76	13	4.49133		1.57035	2.48521	3.04171	3.42972	3.72772		0.94994	1.98653	2.54576	2.97544	3.50626		1.13673	2.17878	2.88579	3.09563	3.59955		1.05884	1.85766	2.33147	2.46872	2.7462			CLVNDQGVVKVSDF	527	540	1522.76	13	4.49133		-0.620414	-0.498681	-0.495951	-0.454286	-0.221455
					VNDQGVVKVSD	529	539	1159.6	10	2.39291		1.40428	2.08243	2.26344	2.59675	2.88407		0.867631	1.70318	2.15582	2.3564	2.68901		0.937638	1.75906	2.21623	2.49599	2.75602		0.835909	1.62094	2.07559	2.15684	2.25568			VNDQGVVKVSD	529	539	1159.6	10	2.39291		-0.536651	-0.379242	-0.107619	-0.240356	-0.195061
					VNDQGVVKVSDF	529	540	1306.66	11	3.94159		1.32699	2.15958	2.5951	2.97431	3.24646		0.759238	1.49318	2.12334	2.54838	2.99123		0.756652	1.6308	2.35145	2.72803	3.00182		0.682029	1.41953	1.79552	1.99389	2.2657			VNDQGVVKVSDF	529	540	1306.66	11	3.94159		-0.567749	-0.666406	-0.471764	-0.425926	-0.255228
					VNDQGVVKVSDFGL	529	542	1476.77	13	4.77918		2.00276	3.35013	4.0393	4.44521	4.74357		1.24696	2.38002	3.59831	4.05389	4.56486		1.19421	2.73256	3.76435	4.22457	4.5269		0.812195	1.71627	2.26467	2.80939	3.51456			VNDQGVVKVSDFGL	529	542	1476.77	13	4.77918		-0.755803	-0.970112	-0.440987	-0.391316	-0.178705
					VNDQGVVKVSDFGLSR	529	544	1719.9	15	3.93876		3.10229	5.15407	6.01574	6.28375	6.62459		2.20514	3.85382	5.24238	5.88706	6.24027		2.41572	4.53447	5.41103	5.98849	6.56931		1.53028	2.71078	3.59879	4.38891	5.43636			VNDQGVVKVSDFGLSR	529	544	1719.9	15	3.93876		-0.897149	-1.30025	-0.77336	-0.396696	-0.384324
					VNDQGVVKVSDFGLSRY	529	545	1882.97	16	4.39821		3.24544	5.52169	6.53758	6.77919	7.10307		2.51511	4.51338	5.68085	6.35554	6.76579		2.74445	4.9285	6.15355	6.55767	6.93645		1.2827	2.44073	3.50643	4.5315	5.75152			VNDQGVVKVSDFGLSRY	529	545	1882.97	16	4.39821		-0.73033	-1.00831	-0.856727	-0.42365	-0.337274
					VNDQGVVKVSDFGLSRYVL	529	547	2095.12	18	5.22274		3.78692	6.5578	7.92085	8.10827	8.47537		3.08798	5.80078	7.12958	7.75687	8.10576		3.36735	6.08843	7.42446	7.97201	8.19026		1.33804	2.80141	4.28058	5.56726	7.00777			VNDQGVVKVSDFGLSRYVL	529	547	2095.12	18	5.22274		-0.698941	-0.757025	-0.791274	-0.351402	-0.36961
					VNDQGVVKVSDFGLSRYVLDD	529	549	2325.17	20	5.03921		4.4139	7.34934	8.586	8.91335	9.20114		3.82407	6.61457	7.90777	8.42054	8.89299		4.07115	6.88476	8.24902	8.75243	9.00528		1.94694	3.54299	5.05461	6.53109	7.82326			VNDQGVVKVSDFGLSRYVLDD	529	549	2325.17	20	5.03921		-0.589839	-0.734762	-0.678222	-0.492808	-0.308156
					VNDQGVVKVSDFGLSRYVLDDE	529	550	2454.21	21	5.05309		4.6259	7.58967	8.93444	9.16354	9.33759		4.0693	6.87495	8.1372	8.79851	9.08476		4.27785	7.15353	8.38527	8.90925	9.28598		2.18336	3.74512	5.1762	6.64121	8.01852			VNDQGVVKVSDFGLSRYVLDDE	529	550	2454.21	21	5.05309		-0.556608	-0.714722	-0.797244	-0.365035	-0.25283
					FGLSRYVL	540	547	954.541	7	4.94083		1.98884	3.47636	3.98958	4.02761	4.09645		2.03301	3.43386	3.94321	4.00348	4.01892		2.04282	3.50511	3.946	3.97213	4.05144		0.551995	1.16233	2.14147	3.05719	3.82579			FGLSRYVL	540	547	954.541	7	4.94083		0.044163	-0.042503	-0.046368	-0.024127	-0.077527
					FGLSRYVLDD	540	549	1184.59	9	4.61993		2.87876	4.48159	5.05928	5.0944	5.11073		2.8061	4.35885	4.93944	4.93237	5.02853		2.92878	4.46666	4.93979	5.06069	5.0554		1.27893	2.0705	3.038	3.90987	4.78861			FGLSRYVLDD	540	549	1184.59	9	4.61993		-0.072663	-0.122738	-0.119844	-0.162032	-0.082201
					FGLSRYVLDDE	540	550	1313.64	10	4.63395		3.17801	4.76843	5.32734	5.4364	5.39912		3.05552	4.65294	5.13335	5.29128	5.30463		3.24633	4.99743	5.29253	5.36185	5.31838		1.60919	2.4271	3.39088	4.22205	5.10887			FGLSRYVLDDE	540	550	1313.64	10	4.63395		-0.12249	-0.115488	-0.19399	-0.145127	-0.09449
					GLSRYVL	541	547	807.472	6	4.0702		2.09706	3.4305	3.74987	3.76196	3.81131		2.09085	3.45265	3.67163	3.71745	3.74879		2.2146	3.58065	3.68951	3.83371	3.80644		0.700268	1.47267	2.39882	3.08579	3.76377			GLSRYVL	541	547	807.472	6	4.0702		-0.006214	0.022149	-0.078244	-0.044513	-0.062518
					GLSRYVLDD	541	549	1037.53	8	3.77289		3.03016	4.32365	4.62748	4.72464	4.75499		3.016	4.26221	4.60795	4.67753	4.77568		3.10847	4.41338	4.6586	4.70526	4.73804		1.47067	2.22033	3.1976	3.93885	4.57089			GLSRYVLDD	541	549	1037.53	8	3.77289		-0.014159	-0.061441	-0.01953	-0.0471	0.020688
					GLSRYVLDDE	541	550	1166.57	9	3.82771		3.30749	4.6947	5.11373	5.16446	5.12296		3.35145	4.78094	4.85274	5.00858	5.03321		3.41726	4.87671	4.95944	5.01015	5.06028		1.80648	2.60476	3.55341	4.32726	4.98263			GLSRYVLDDE	541	550	1166.57	9	3.82771		0.043955	0.086237	-0.260988	-0.155884	-0.089749
					SRYVLDD	543	549	867.421	6	2.93745		2.12722	3.28739	3.57587	3.46298	3.48486		2.45607	3.11629	3.45947	3.54043	3.27095		2.18202	3.21029	3.52236	3.36834	3.53896		1.09395	1.59931	2.04159	2.81391	3.25468			SRYVLDD	543	549	867.421	6	2.93745		0.328844	-0.171103	-0.116408	0.077453	-0.213914
					SRYVLDDE	543	550	996.463	7	3.07168		2.4326	3.49518	3.853	3.77166	3.81747		2.60863	3.54915	3.66947	3.72044	3.76058		2.61919	3.60363	3.73532	3.75264	3.83269		1.38309	1.88297	2.41667	3.13165	3.66514			SRYVLDDE	543	550	996.463	7	3.07168		0.176036	0.053966	-0.183528	-0.051216	-0.056893
					EYTSSVGSKF	550	559	1104.52	9	3.23675		4.80348	4.90774	4.76608	4.77526	4.86489		4.66563	4.82891	4.79941	4.64457	4.83604		4.83705	4.79222	4.7287	4.80401	4.75501		4.38065	4.69716	4.76615	4.82048	4.83544			EYTSSVGSKF	550	559	1104.52	9	3.23675		-0.13785	-0.078833	0.033331	-0.130688	-0.028851
					EYTSSVGSKFPVRWSPPEVL	550	569	2265.16	16	4.97764		5.07808	5.58155	7.32895	8.68583	9.14464		4.90915	5.39215	7.00244	8.68119	9.03087		5.24389	6.20646	8.15346	8.89571	9.08967		4.4013	5.23468	6.46259	8.10578	8.9503			EYTSSVGSKFPVRWSPPEVL	550	569	2265.16	16	4.97764		-0.168929	-0.189398	-0.326516	-0.004633	-0.11377
					EYTSSVGSKFPVRWSPPEVLM	550	570	2396.2	17	5.20443		5.32374	6.12783	8.13641	9.70006	10.0408		4.87174	5.8719	8.24172	9.63347	10.0585		5.49473	6.89803	9.07415	9.86048	9.89753		4.42129	5.69952	7.36392	8.79982	9.73695			EYTSSVGSKFPVRWSPPEVLM	550	570	2396.2	17	5.20443		-0.451991	-0.255931	0.105306	-0.066585	0.017728
					YTSSVGSKFPVRWSPPEVL	551	569	2136.11	15	4.89407		4.73618	5.20228	6.75706	8.36386	8.95271		4.51506	4.92059	6.57718	8.20519	8.66037		4.93414	6.01797	7.73719	8.6282	8.78421		4.10778	4.96538	6.011	7.65746	8.5402			YTSSVGSKFPVRWSPPEVL	551	569	2136.11	15	4.89407		-0.221122	-0.281691	-0.179888	-0.158671	-0.292344
					YTSSVGSKFPVRWSPPEVLM	551	570	2267.15	16	5.15183		4.44001	5.28997	7.24933	8.90275	9.27896		4.15801	5.08701	7.03625	8.73816	9.19978		4.67267	6.37719	8.38693	9.00717	9.25425		3.8022	4.7535	6.42861	8.09695	8.87023			YTSSVGSKFPVRWSPPEVLM	551	570	2267.15	16	5.15183		-0.282	-0.202961	-0.213084	-0.164592	-0.079179
					PVRWSPPEVL	560	569	1179.65	6	4.71664		0.641796	0.979535	2.33764	3.95737	4.33694		0.560188	0.916884	2.40449	3.80666	4.21537		0.88382	1.72547	3.37318	4.08169	4.2455		0.487672	0.773573	1.83789	3.29465	4.12988			PVRWSPPEVL	560	569	1179.65	6	4.71664		-0.081608	-0.062651	0.066845	-0.150715	-0.121577
					MYSKFSSKSDIWA	570	582	1549.74	12	4.08062		1.17046	2.14849	2.79741	2.91634	3.06957		1.16472	2.112	2.79381	2.98344	3.13656		1.63032	2.46425	2.93669	3.20498	3.54911		0.894313	1.7151	2.62902	2.97877	3.07896			MYSKFSSKSDIWA	570	582	1549.74	12	4.08062		-0.005733	-0.036493	-0.003599	0.067106	0.066986
					MYSKFSSKSDIWAF	570	583	1696.8	13	5.13436		1.1213	1.96123	2.65798	2.79665	2.97643		1.01338	2.03181	2.63925	2.82862	3.04151		1.34226	2.42914	2.64032	2.90884	3.28515		0.782045	1.59205	2.35715	2.82544	2.97326			MYSKFSSKSDIWAF	570	583	1696.8	13	5.13436		-0.10792	0.070583	-0.018729	0.031978	0.06508
					YSKFSSKSDIWA	571	582	1418.7	11	3.8429		1.11489	1.88529	2.59587	2.75523	2.92911		0.989346	1.71817	2.49901	2.76222	2.76907		1.44569	2.0607	2.67292	2.95398	3.31583		0.721718	1.41256	2.32312	2.73863	2.82763			YSKFSSKSDIWA	571	582	1418.7	11	3.8429		-0.125544	-0.167119	-0.096853	0.00699	-0.160042
					YSKFSSKSDIWAF	571	583	1565.76	12	4.99844		0.973276	1.70218	2.30795	2.47635	2.60899		0.822339	1.5513	2.18165	2.3566	2.52516		1.27896	1.96348	2.41648	2.71468	3.0222		0.626049	1.27599	2.08145	2.33348	2.42116			YSKFSSKSDIWAF	571	583	1565.76	12	4.99844		-0.150937	-0.150879	-0.126308	-0.119752	-0.083832
					SSKSDIWA	575	582	893.436	7	3.5092		0.25657	0.439929	0.900613	1.09196	1.19714		0.212344	0.39874	0.868447	1.04183	1.13133		0.467244	0.67942	1.10379	1.32361	1.57947		0.133226	0.290552	0.69389	1.0212	1.07742			SSKSDIWA	575	582	893.436	7	3.5092		-0.044226	-0.041189	-0.032166	-0.050127	-0.065809
					SSKSDIWAF	575	583	1040.5	8	5.13673		0.280384	0.401015	0.795713	0.918822	1.01813		0.211678	0.295492	0.677953	0.81665	0.913524		0.365643	0.578508	0.857453	1.07987	1.44901		0.222546	0.27299	0.562244	0.804766	0.896209			SSKSDIWAF	575	583	1040.5	8	5.13673		-0.068706	-0.105523	-0.11776	-0.102172	-0.104603
					MWEIYSL	587	593	941.444	6	6.13416		0.020892	0.022218	0.066596	0.175279	0.47132		-0.078156	-0.092984	0.007435	0.127036	0.419289		-0.005697	-0.020794	0.237796	0.54026	0.70072		0.034917	0.001973	0.102546	0.180613	0.508623			MWEIYSL	587	593	941.444	6	6.13416		-0.099048	-0.115202	-0.059161	-0.048243	-0.052031
					MWEIYSLGKMPYERF	587	601	1949.93	13	5.71693		1.67665	3.22511	3.82124	4.84688	5.52544		1.52387	3.03296	3.82875	4.84133	5.54702		2.08324	3.5251	4.62709	5.65814	5.74139		1.58665	2.89948	3.66127	4.64317	5.50185			MWEIYSLGKMPYERF	587	601	1949.93	13	5.71693		-0.152779	-0.192141	0.007518	-0.005544	0.021576
					MWEIYSLGKMPYERFTNSE	587	605	2381.09	17	5.5046		2.86494	5.04678	5.90039	6.77527	7.61069		2.84692	5.07776	5.95733	6.90907	7.57406		3.53197	5.62543	6.74207	7.63921	7.82277		2.70075	4.65995	5.85738	6.65992	7.51585			MWEIYSLGKMPYERFTNSE	587	605	2381.09	17	5.5046		-0.018014	0.030976	0.056941	0.133801	-0.036621
					WEIYSLGKM	588	596	1126.56	8	5.26478		0.499378	0.925712	1.17935	2.21816	2.90036		0.218437	0.979601	1.37911	2.07089	2.89804		0.635101	1.01402	2.05364	2.90884	3.00332		0.566935	1.05675	1.17616	2.29987	2.81087			WEIYSLGKM	588	596	1126.56	8	5.26478		-0.280941	0.053889	0.199757	-0.147274	-0.002328
					WEIYSLGKMPYE	588	599	1515.72	10	5.42673		0.952878	2.24935	2.5547	3.54305	4.30034		0.838286	1.95647	2.58912	3.73455	4.39461		1.05705	2.39189	3.47809	4.21831	4.54819		0.708915	1.89932	2.51968	3.39296	4.27656			WEIYSLGKMPYE	588	599	1515.72	10	5.42673		-0.114592	-0.292871	0.034422	0.191509	0.094276
					WEIYSLGKMPYERF	588	601	1818.89	12	5.46282		1.52109	2.9285	3.65877	4.6153	5.39609		1.41528	2.78459	3.65133	4.63542	5.28522		1.95514	3.32072	4.67601	5.31257	5.5108		1.39929	2.65808	3.67548	4.54511	5.34387			WEIYSLGKMPYERF	588	601	1818.89	12	5.46282		-0.105812	-0.143902	-0.007444	0.020123	-0.110865
					WEIYSLGKMPYERFTNS	588	604	2121.01	15	5.2564		2.74037	4.59075	5.60635	6.4311	7.20886		2.78541	4.67436	5.55335	6.61939	7.21351		3.34849	5.32888	6.52701	7.23423	7.47438		2.66652	4.38485	5.47006	6.4311	7.24089			WEIYSLGKMPYERFTNS	588	604	2121.01	15	5.2564		0.045038	0.083607	-0.052998	0.188286	0.004649
					WEIYSLGKMPYERFTNSE	588	605	2250.05	16	5.25498		2.84465	4.9796	6.00154	6.85084	7.52659		2.82808	4.92287	5.68552	6.8376	7.50901		3.55184	5.44524	6.69371	7.48147	7.79115		2.63334	4.58518	5.55708	6.69138	7.46228			WEIYSLGKMPYERFTNSE	588	605	2250.05	16	5.25498		-0.016566	-0.056725	-0.316018	-0.013233	-0.017585
					WEIYSLGKMPYERFTNSETAE	588	608	2551.18	19	5.21157		3.03769	5.71097	7.93945	8.74011	9.43299		3.03317	5.80675	7.70498	8.82868	9.35557		3.99397	7.06471	8.65079	9.40785	9.6669		2.72538	5.23027	7.52467	8.59484	9.40108			WEIYSLGKMPYERFTNSETAE	588	608	2551.18	19	5.21157		-0.00451	0.095788	-0.234475	0.088573	-0.077417
					GKMPYERF	594	601	1027.5	6	3.44326		1.6007	3.03455	3.51863	3.8274	3.69158		1.59766	3.16641	3.71026	3.7553	3.74278		1.94235	3.46248	3.73505	3.74722	3.80138		1.64649	2.95565	3.74673	3.74273	3.80272			GKMPYERF	594	601	1027.5	6	3.44326		-0.003031	0.131858	0.191636	-0.072091	0.051204
					GKMPYERFTNSE	594	605	1458.67	10	3.39811		2.99016	5.27919	5.89309	5.94902	5.93439		2.98902	5.17568	5.81894	5.91193	5.9409		3.66449	5.50125	5.71096	5.8504	5.94874		2.86553	4.94248	5.79049	5.79998	5.8609			GKMPYERFTNSE	594	605	1458.67	10	3.39811		-0.001138	-0.103518	-0.074143	-0.037086	0.006504
					GKMPYERFTNSETAE	594	608	1759.8	13	3.41725		2.9895	5.873	7.62836	7.77814	7.85222		2.94814	5.74987	7.52365	7.67133	7.74907		3.97729	6.88313	7.59742	7.657	7.66721		2.67332	5.27278	7.46383	7.66575	7.71814			GKMPYERFTNSETAE	594	608	1759.8	13	3.41725		-0.041357	-0.123134	-0.104711	-0.106805	-0.103155
					TAEHIAQGLRLPRPHL	606	621	1809.02	13	3.69791		3.22983	4.40881	6.41836	6.9769	7.44763		3.1304	4.39969	6.2852	6.81573	7.27847		3.73599	5.36205	6.68334	7.33764	7.55924		3.03857	4.12385	6.03601	6.9105	7.2365			TAEHIAQGLRLPRPHL	606	621	1809.02	13	3.69791		-0.099429	-0.009121	-0.133162	-0.161171	-0.169164
					TAEHIAQGLRLPRPHLAS	606	623	1967.09	15	3.46604		3.49497	4.61434	6.75818	7.55963	8.23694		3.43185	4.5895	6.71205	7.49776	8.15072		3.91398	5.58653	7.11768	7.99474	8.38693		3.36081	4.42489	6.4057	7.37512	8.08966			TAEHIAQGLRLPRPHLAS	606	623	1967.09	15	3.46604		-0.063116	-0.024847	-0.046128	-0.061867	-0.086219
					TAEHIAQGLRLPRPHLASE	606	624	2096.14	16	3.51069		4.01479	5.13875	7.2522	8.0257	8.63704		3.93746	5.11525	7.17592	8.02583	8.56176		4.29007	6.19598	7.45474	8.32583	8.74245		3.75668	4.92253	6.87636	7.82129	8.45503			TAEHIAQGLRLPRPHLASE	606	624	2096.14	16	3.51069		-0.077326	-0.023504	-0.076282	0.000131	-0.075283
					AEHIAQGLRLPRPHLAS	607	623	1866.05	14	3.35515		3.51812	4.55933	6.04495	6.82128	7.37022		3.3882	4.37429	5.95751	6.74888	7.41038		3.77054	5.20199	6.33956	7.11911	7.64438		3.32074	4.17126	5.93236	6.57166	7.36041			AEHIAQGLRLPRPHLAS	607	623	1866.05	14	3.35515		-0.129917	-0.185042	-0.08744	-0.072396	0.040158
					HIAQGLRLPRPHL	609	621	1507.9	10	3.44031		2.97379	3.67117	4.93788	5.26454	5.66328		2.84497	3.61322	4.78524	5.1449	5.60094		3.24258	4.34459	5.01726	5.55458	5.75274		2.9118	3.63965	4.78707	5.1341	5.61163			HIAQGLRLPRPHL	609	621	1507.9	10	3.44031		-0.128814	-0.057951	-0.152637	-0.119641	-0.062347
					HIAQGLRLPRPHLAS	609	623	1665.97	12	3.16845		3.26697	3.99701	5.05713	5.66183	6.25382		3.17214	3.99203	5.14308	5.70133	6.30594		3.43854	4.53808	5.34559	6.01048	6.46782		3.10431	3.87391	5.10087	5.59036	6.20792			HIAQGLRLPRPHLAS	609	623	1665.97	12	3.16845		-0.094826	-0.004975	0.085945	0.039495	0.05212
					HIAQGLRLPRPHLASE	609	624	1795.01	13	3.22183		3.86511	4.60425	5.87927	6.44526	7.07739		3.78106	4.59251	5.75166	6.39591	6.97996		4.0448	5.19506	6.02668	6.84096	7.24685		3.74615	4.55242	5.68859	6.34338	6.9483			HIAQGLRLPRPHLASE	609	624	1795.01	13	3.22183		-0.084045	-0.011742	-0.127607	-0.049347	-0.097432
					LRLPRPHLAS	614	623	1159.71	7	3.02342		2.11211	2.15577	2.16975	2.6278	3.37029		1.99049	2.08416	2.1518	2.51795	3.35332		2.11131	2.09045	2.41898	3.1063	3.54849		2.14992	2.13907	2.23712	2.55849	3.29903			LRLPRPHLAS	614	623	1159.71	7	3.02342		-0.121622	-0.071611	-0.017943	-0.109855	-0.016971
					ERVYTIM	624	630	911.466	6	3.78369		0.061287	0.165414	0.781023	1.29486	1.80052		0.001416	0.0836	0.750409	1.26553	1.7103		0.043023	0.08582	0.747302	1.20085	1.78686		0.034193	0.144901	0.75397	1.31632	1.77579			ERVYTIM	624	630	911.466	6	3.78369		-0.059871	-0.081814	-0.030614	-0.029334	-0.090211
					YSCWHEKADERPSF	631	644	1754.76	12	3.60174		1.65473	2.34328	2.93974	3.76096	4.18391		1.47691	2.13011	2.83695	3.61511	4.02977		1.57317	2.32334	3.00626	3.72062	4.13515		1.48356	2.18212	2.83246	3.64071	4.17729			YSCWHEKADERPSF	631	644	1754.76	12	3.60174		-0.177818	-0.213164	-0.102793	-0.145853	-0.154138
					SCWHEKADERPSF	632	644	1591.7	11	3.60398		1.47109	2.09428	2.5516	3.48102	3.84396		1.37115	1.99181	2.64663	3.47083	3.80211		1.44287	2.11584	2.82905	3.5567	3.94923		1.35345	2.06458	2.68182	3.40713	3.88558			SCWHEKADERPSF	632	644	1591.7	11	3.60398		-0.099946	-0.102465	0.095025	-0.010181	-0.041852
					WHEKADERPSF	634	644	1401.65	9	2.93814		1.42967	2.32038	2.87587	3.62984	4.14269		1.49344	2.38038	2.96089	3.80978	4.34457		1.60205	2.40629	3.14271	3.90346	4.15031		1.56227	2.34115	2.98531	3.71408	4.24885			WHEKADERPSF	634	644	1401.65	9	2.93814		0.063767	0.059998	0.085024	0.179945	0.20188
					HEKADERPSF	635	644	1215.58	8	2.26775		1.34084	1.96037	2.48735	3.28653	3.68881		1.27767	1.88524	2.43715	3.2812	3.68143		1.38427	1.94007	2.61211	3.36541	3.72087		1.26216	1.83564	2.43473	3.21374	3.71379			HEKADERPSF	635	644	1215.58	8	2.26775		-0.063175	-0.075132	-0.050204	-0.005332	-0.007383
					KILLSNIL	645	652	913.608	7	5.04797		0.01298	0.0021	0.04181	0.152825	0.575269		0.020777	-0.005425	0.035341	0.167507	0.559068		0.041431	-0.01627	0.036373	0.188658	0.61317		0.008894	0.006187	0.060896	0.183672	0.551927			KILLSNIL	645	652	913.608	7	5.04797		0.007797	-0.007525	-0.006469	0.014682	-0.016201
					KILLSNILDV	645	654	1127.7	9	5.49471		0.028376	0.023876	0.061858	0.523532	1.59833		-0.022034	-0.004075	0.071665	0.49906	1.53291		0.025014	-0.035876	0.108389	0.543828	1.61696		-0.004773	-0.006406	0.112793	0.504074	1.52949			KILLSNILDV	645	654	1127.7	9	5.49471		-0.05041	-0.027951	0.009807	-0.024472	-0.065418
					DVMDEESHHHHHH	653	665	1646.65	12	1.29316		2.11472	2.54876	2.63056	2.72795	2.79352		2.09586	2.50956	2.71705	2.70249	2.73325		2.06825	2.37632	2.69094	2.6865	2.70211		2.0847	2.43612	2.65759	2.69943	2.69672			DVMDEESHHHHHH	653	665	1646.65	12	1.29316		-0.018862	-0.039193	0.086485	-0.025459	-0.060271
					MDEESHHHHHH	655	665	1432.56	10	1.29486		1.61892	1.85088	1.94646	2.02145	2.08203		1.50963	1.78255	1.92647	1.95699	2.00832		1.52482	1.68504	1.892	1.93122	1.93146		1.581	1.81256	1.95491	1.9768	1.99676			MDEESHHHHHH	655	665	1432.56	10	1.29486		-0.109289	-0.068327	-0.019992	-0.064455	-0.073718
					DEESHHHHHH	656	665	1301.52	9	1.29335		1.35961	1.57545	1.65933	1.64113	1.80528		1.31112	1.53803	1.67374	1.57664	1.6916		1.36544	1.47702	1.67297	1.64569	1.65036		1.41252	1.53089	1.75659	1.72406	1.73139			DEESHHHHHH	656	665	1301.52	9	1.29335		-0.048495	-0.037418	0.014405	-0.064494	-0.113678
					*Puprple = Data in Figure 8 panel e
[truncated: 171 more columns]
